# Supplementary material for: Elongation inhibitors do not prevent the release of puromycylated nascent polypeptide chains from ribosomes
Source: eLife journal article supplement (doi:10.7554/elife.60048), 2020-08-26
Supplement: supp [file elife-60048-supp-v1.zip]

Archive with 15 entries (15 files):
- elife_poa_e60048_Figure_1_figure_supplement_1.pdf
- elife_poa_e60048_Figure_1_figure_supplement_2.pdf
- elife_poa_e60048_Figure_2_figure_supplement_1.pdf
- elife_poa_e60048_Figure_3_figure_supplement_1.pdf
- elife_poa_e60048_Figure_3_figure_supplement_2.pdf
- elife_poa_e60048_Figure_3_video_1.avi
- elife_poa_e60048_Figure_1_source_data_1.docx
- elife_poa_e60048_Figure_1_source_data_2.xlsx
- elife_poa_e60048_Figure_1_source_data_3.xlsx
- elife_poa_e60048_Figure_1_source_data_4.xlsx
- elife_poa_e60048_Figure_2_source_data_1.pdf
- elife_poa_e60048_Figure_2_source_data_2.xlsx
- elife_poa_e60048_Figure_3_source_data_1.xlsx
- elife_poa_e60048_Figure_4_source_data_1.docx
- elife_poa_e60048_Transparent_Reporting_File.docx
