# Supplementary material for: Elongation inhibitors do not prevent the release of puromycylated nascent polypeptide chains from ribosomes
Source: eLife journal article supplement (doi:10.7554/elife.60048), 2020-08-26

A

Puro Washout

After Puro Washout

5 min Puro  
↓  
2x washes  
+ fresh media  
↓ 15-45min  
Fix and Stain  
(IF / PLA)

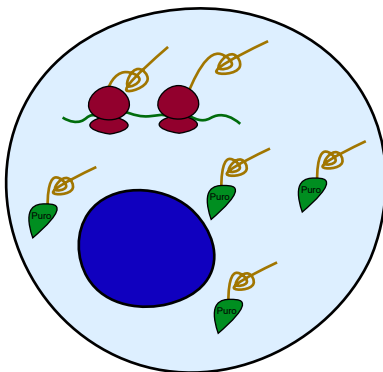

B

Harringtonine Runoff

After Harringtonine Runoff

5 min +/- Puro  
↓  
2x washes  
+ fresh media (+ Harr)  
↓ 20min  
5 min +/- Puro  
↓  
Fix and Stain  
(IF / PLA)

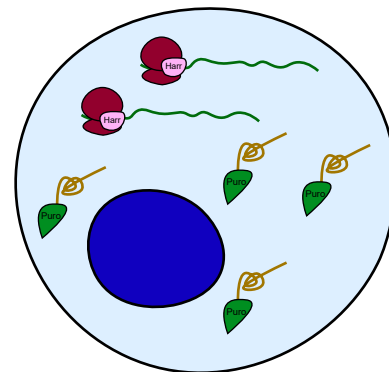

C

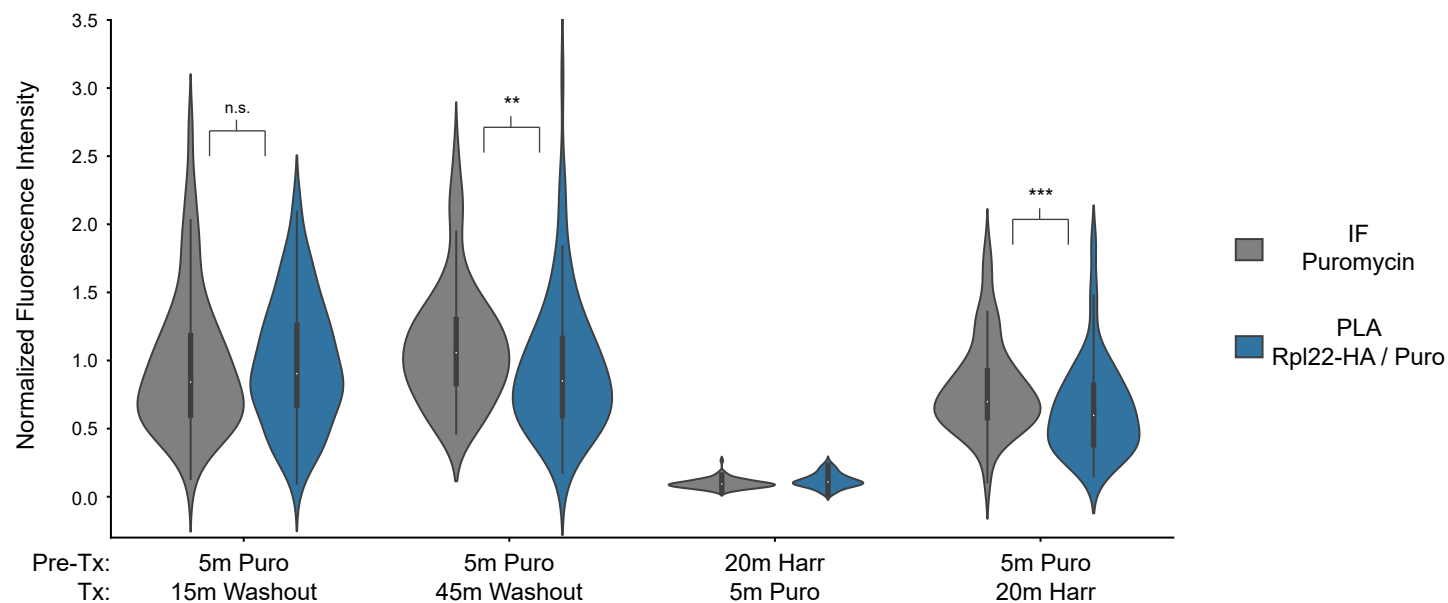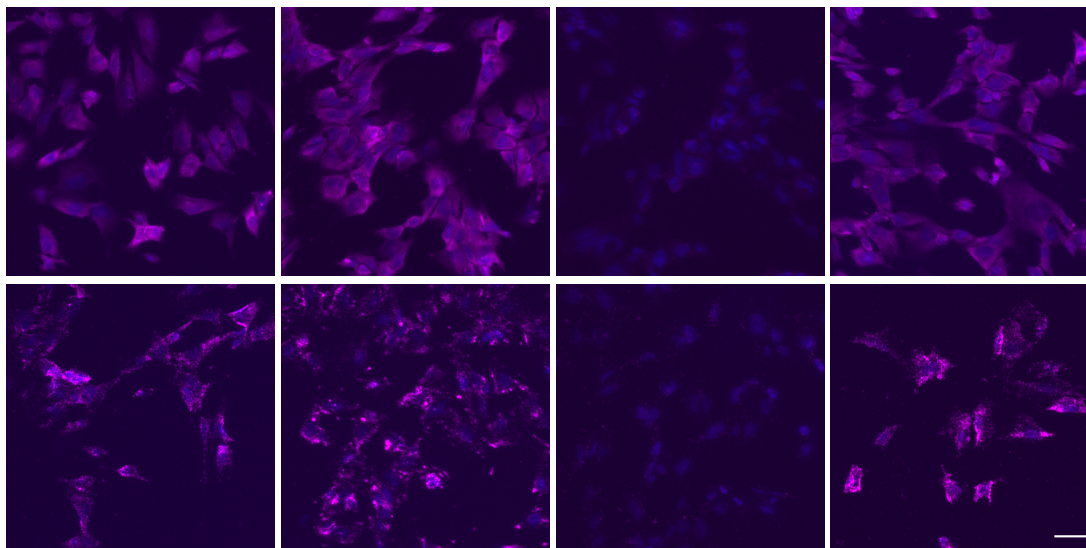

Supplement: supp [file elife-60048-supp-v1.zip › elife_poa_e60048_Figure_1_figure_supplement_2.pdf]
