# Supplementary material for: Elongation inhibitors do not prevent the release of puromycylated nascent polypeptide chains from ribosomes
Source: eLife journal article supplement (doi:10.7554/elife.60048), 2020-08-26
Supplement: supp [file elife-60048-supp-v1.zip › elife_poa_e60048_Figure_1_source_data_2.xlsx]

## Sheet: Figure 1C
groups	Normalized Fluorescence Intensity	Cells.Condition	Fluor
333.NoPuro_IF		333.NoPuro	IF
333.NoPuro_IF		333.NoPuro	IF
333.NoPuro_IF		333.NoPuro	IF
333.NoPuro_IF		333.NoPuro	IF
333.NoPuro_IF		333.NoPuro	IF
333.NoPuro_IF		333.NoPuro	IF
333.NoPuro_IF		333.NoPuro	IF
333.NoPuro_IF		333.NoPuro	IF
333.NoPuro_IF		333.NoPuro	IF
333.NoPuro_IF		333.NoPuro	IF
333.NoPuro_IF		333.NoPuro	IF
333.NoPuro_IF		333.NoPuro	IF
333.NoPuro_IF		333.NoPuro	IF
333.NoPuro_IF		333.NoPuro	IF
333.NoPuro_IF		333.NoPuro	IF
333.NoPuro_IF		333.NoPuro	IF
333.NoPuro_IF		333.NoPuro	IF
333.NoPuro_IF		333.NoPuro	IF
333.NoPuro_IF		333.NoPuro	IF
333.NoPuro_IF		333.NoPuro	IF
333.NoPuro_IF		333.NoPuro	IF
333.NoPuro_IF		333.NoPuro	IF
333.NoPuro_IF		333.NoPuro	IF
333.NoPuro_IF		333.NoPuro	IF
333.NoPuro_IF		333.NoPuro	IF
333.NoPuro_IF		333.NoPuro	IF
333.NoPuro_IF		333.NoPuro	IF
333.NoPuro_IF		333.NoPuro	IF
333.NoPuro_IF		333.NoPuro	IF
333.NoPuro_IF		333.NoPuro	IF
333.NoPuro_IF		333.NoPuro	IF
333.NoPuro_IF		333.NoPuro	IF
333.NoPuro_IF	0.00498471	333.NoPuro	IF
333.NoPuro_IF	0.0256304	333.NoPuro	IF
333.NoPuro_IF	0.0216606	333.NoPuro	IF
333.NoPuro_IF	0.011598	333.NoPuro	IF
333.NoPuro_IF	0.0104426	333.NoPuro	IF
333.NoPuro_IF	0.0147	333.NoPuro	IF
333.NoPuro_IF	0.00973245	333.NoPuro	IF
333.NoPuro_IF	0.0213999	333.NoPuro	IF
333.NoPuro_IF	0.0306682	333.NoPuro	IF
333.NoPuro_IF	0.0265759	333.NoPuro	IF
333.NoPuro_IF	0.0140095	333.NoPuro	IF
333.NoPuro_IF	0.0193301	333.NoPuro	IF
333.NoPuro_IF	0.042826	333.NoPuro	IF
333.NoPuro_IF	0.0234396	333.NoPuro	IF
333.NoPuro_IF	0.0259181	333.NoPuro	IF
333.NoPuro_IF	0.0282993	333.NoPuro	IF
333.NoPuro_IF	0.018861	333.NoPuro	IF
333.NoPuro_IF	0.0215683	333.NoPuro	IF
333.NoPuro_IF	0.0274707	333.NoPuro	IF
333.NoPuro_IF	0.0162551	333.NoPuro	IF
333.NoPuro_IF	0.00229399	333.NoPuro	IF
333.NoPuro_IF	0.0190116	333.NoPuro	IF
333.NoPuro_IF	0.0275076	333.NoPuro	IF
333.NoPuro_IF	0.0111463	333.NoPuro	IF
333.NoPuro_IF	0.0181192	333.NoPuro	IF
333.NoPuro_IF	0.0418358	333.NoPuro	IF
333.NoPuro_IF	0.0291706	333.NoPuro	IF
333.NoPuro_IF	0.0334607	333.NoPuro	IF
333.NoPuro_IF	0.0254704	333.NoPuro	IF
333.NoPuro_IF	0.0261291	333.NoPuro	IF
333.NoPuro_IF	0.0116048	333.NoPuro	IF
333.NoPuro_IF	0.0209736	333.NoPuro	IF
333.NoPuro_IF	0.0253495	333.NoPuro	IF
333.NoPuro_IF	0.048195	333.NoPuro	IF
333.NoPuro_IF	0.01686	333.NoPuro	IF
333.NoPuro_IF	0.0173176	333.NoPuro	IF
333.NoPuro_IF	0.00811139	333.NoPuro	IF
333.NoPuro_IF	0.0264903	333.NoPuro	IF
333.NoPuro_IF	0.0309978	333.NoPuro	IF
333.NoPuro_IF	0.0209899	333.NoPuro	IF
333.NoPuro_IF	0.106829	333.NoPuro	IF
333.NoPuro_IF	0.124503	333.NoPuro	IF
333.NoPuro_IF	0.177155	333.NoPuro	IF
333.NoPuro_IF	0.196795	333.NoPuro	IF
333.NoPuro_IF	0.217261	333.NoPuro	IF
333.NoPuro_IF	0.140551	333.NoPuro	IF
333.NoPuro_IF	0.200451	333.NoPuro	IF
333.NoPuro_IF	0.192037	333.NoPuro	IF
333.NoPuro_IF	-0.00294977	333.NoPuro	IF
333.NoPuro_IF	-0.0158295	333.NoPuro	IF
333.NoPuro_IF	0.00635894	333.NoPuro	IF
333.NoPuro_IF	-0.00657287	333.NoPuro	IF
333.NoPuro_IF	0.102392	333.NoPuro	IF
333.NoPuro_IF	0.0784452	333.NoPuro	IF
333.NoPuro_IF	0.0205112	333.NoPuro	IF
333.NoPuro_IF	0.11817	333.NoPuro	IF
333.NoPuro_IF	0.073991	333.NoPuro	IF
333.NoPuro_IF	0.146275	333.NoPuro	IF
333.NoPuro_IF	0.110195	333.NoPuro	IF
333.NoPuro_IF	0.113593	333.NoPuro	IF
333.NoPuro_IF	0.0784314	333.NoPuro	IF
333.NoPuro_IF	0.0626143	333.NoPuro	IF
333.NoPuro_IF	0.158748	333.NoPuro	IF
333.NoPuro_IF	0.262239	333.NoPuro	IF
333.NoPuro_IF	0.185432	333.NoPuro	IF
333.NoPuro_IF	0.121857	333.NoPuro	IF
333.NoPuro_IF	0.104857	333.NoPuro	IF
333.NoPuro_IF	0.101827	333.NoPuro	IF
333.NoPuro_IF	0.0780502	333.NoPuro	IF
333.NoPuro_IF	0.113982	333.NoPuro	IF
333.NoPuro_IF	0.144733	333.NoPuro	IF
333.NoPuro_IF	0.147119	333.NoPuro	IF
333.NoPuro_IF	0.0361322	333.NoPuro	IF
333.NoPuro_IF	0.0264697	333.NoPuro	IF
333.NoPuro_IF	0.119708	333.NoPuro	IF
333.NoPuro_IF	0.136101	333.NoPuro	IF
333.NoPuro_IF	0.115122	333.NoPuro	IF
333.NoPuro_IF	0.181939	333.NoPuro	IF
333.NoPuro_IF	0.0778843	333.NoPuro	IF
333.NoPuro_IF	0.0668559	333.NoPuro	IF
333.NoPuro_IF	0.177038	333.NoPuro	IF
333.NoPuro_IF	0.0983695	333.NoPuro	IF
333.NoPuro_IF	0.18217	333.NoPuro	IF
333.NoPuro_IF	0.169444	333.NoPuro	IF
333.NoPuro_IF	0.325566	333.NoPuro	IF
333.NoPuro_IF	0.218236	333.NoPuro	IF
333.NoPuro_IF	0.234618	333.NoPuro	IF
333.NoPuro_IF	0.235238	333.NoPuro	IF
333.NoPuro_IF		333.NoPuro	IF
333.NoPuro_IF		333.NoPuro	IF
333.NoPuro_IF		333.NoPuro	IF
333.NoPuro_IF		333.NoPuro	IF
333.NoPuro_IF		333.NoPuro	IF
333.NoPuro_IF		333.NoPuro	IF
333.NoPuro_IF		333.NoPuro	IF
333.NoPuro_IF		333.NoPuro	IF
333.NoPuro_IF		333.NoPuro	IF
333.NoPuro_IF		333.NoPuro	IF
333.NoPuro_IF		333.NoPuro	IF
333.NoPuro_IF		333.NoPuro	IF
333.NoPuro_IF	0.0563555	333.NoPuro	IF
333.NoPuro_IF	0.0347329	333.NoPuro	IF
333.NoPuro_IF	0.0585991	333.NoPuro	IF
333.NoPuro_IF	0.0615469	333.NoPuro	IF
333.NoPuro_IF	0.0418602	333.NoPuro	IF
333.NoPuro_IF	0.0404808	333.NoPuro	IF
333.NoPuro_IF	0.0443252	333.NoPuro	IF
333.NoPuro_IF	0.0356427	333.NoPuro	IF
333.NoPuro_IF	0.0465575	333.NoPuro	IF
333.NoPuro_IF	0.0515825	333.NoPuro	IF
333.NoPuro_IF	0.0796871	333.NoPuro	IF
333.NoPuro_IF	0.0851167	333.NoPuro	IF
333.NoPuro_IF	0.0841593	333.NoPuro	IF
333.NoPuro_IF	0.0400943	333.NoPuro	IF
333.NoPuro_IF	0.0518539	333.NoPuro	IF
333.NoPuro_IF	0.0511729	333.NoPuro	IF
333.NoPuro_IF	0.0584716	333.NoPuro	IF
333.NoPuro_IF	0.0533146	333.NoPuro	IF
333.NoPuro_IF	0.0707833	333.NoPuro	IF
333.NoPuro_IF	0.0972696	333.NoPuro	IF
333.NoPuro_IF	0.0741	333.NoPuro	IF
333.NoPuro_IF	0.0519221	333.NoPuro	IF
333.NoPuro_IF	0.076403	333.NoPuro	IF
333.NoPuro_IF	0.0714311	333.NoPuro	IF
333.NoPuro_IF	0.0638236	333.NoPuro	IF
333.NoPuro_IF	0.00478363	333.NoPuro	IF
333.NoPuro_IF	0.0215388	333.NoPuro	IF
333.NoPuro_IF	0.0356677	333.NoPuro	IF
333.NoPuro_IF	0.0263506	333.NoPuro	IF
333.NoPuro_IF	0.0174624	333.NoPuro	IF
333.NoPuro_IF	0.0112712	333.NoPuro	IF
333.NoPuro_IF	0.0351356	333.NoPuro	IF
333.NoPuro_IF		333.NoPuro	IF
333.NoPuro_IF		333.NoPuro	IF
333.NoPuro_IF		333.NoPuro	IF
333.NoPuro_IF		333.NoPuro	IF
333.NoPuro_IF		333.NoPuro	IF
333.NoPuro_IF		333.NoPuro	IF
333.NoPuro_IF		333.NoPuro	IF
333.NoPuro_IF		333.NoPuro	IF
333.NoPuro_PLA	0.494958	333.NoPuro	PLA
333.NoPuro_PLA	0.0959512	333.NoPuro	PLA
333.NoPuro_PLA	0.455179	333.NoPuro	PLA
333.NoPuro_PLA	0.0824375	333.NoPuro	PLA
333.NoPuro_PLA	0.131909	333.NoPuro	PLA
333.NoPuro_PLA	0.133431	333.NoPuro	PLA
333.NoPuro_PLA	0.215056	333.NoPuro	PLA
333.NoPuro_PLA	0.114864	333.NoPuro	PLA
333.NoPuro_PLA	0.0684708	333.NoPuro	PLA
333.NoPuro_PLA	0.256144	333.NoPuro	PLA
333.NoPuro_PLA	0.0587319	333.NoPuro	PLA
333.NoPuro_PLA	0.0652137	333.NoPuro	PLA
333.NoPuro_PLA	0.0624225	333.NoPuro	PLA
333.NoPuro_PLA	0.0265169	333.NoPuro	PLA
333.NoPuro_PLA	0.0255175	333.NoPuro	PLA
333.NoPuro_PLA	0.102848	333.NoPuro	PLA
333.NoPuro_PLA	0.0477236	333.NoPuro	PLA
333.NoPuro_PLA	0.204317	333.NoPuro	PLA
333.NoPuro_PLA	0.162934	333.NoPuro	PLA
333.NoPuro_PLA	0.123606	333.NoPuro	PLA
333.NoPuro_PLA	0.210063	333.NoPuro	PLA
333.NoPuro_PLA	0.0869889	333.NoPuro	PLA
333.NoPuro_PLA	0.148772	333.NoPuro	PLA
333.NoPuro_PLA	0.0846037	333.NoPuro	PLA
333.NoPuro_PLA	0.0949694	333.NoPuro	PLA
333.NoPuro_PLA	0.123309	333.NoPuro	PLA
333.NoPuro_PLA	0.0959799	333.NoPuro	PLA
333.NoPuro_PLA	0.292785	333.NoPuro	PLA
333.NoPuro_PLA	0.187523	333.NoPuro	PLA
333.NoPuro_PLA	0.0797573	333.NoPuro	PLA
333.NoPuro_PLA	0.107945	333.NoPuro	PLA
333.NoPuro_PLA	0.0785628	333.NoPuro	PLA
333.NoPuro_PLA	0.0272674	333.NoPuro	PLA
333.NoPuro_PLA	0.0216805	333.NoPuro	PLA
333.NoPuro_PLA	-0.00219534	333.NoPuro	PLA
333.NoPuro_PLA	-0.00295551	333.NoPuro	PLA
333.NoPuro_PLA	0.012883	333.NoPuro	PLA
333.NoPuro_PLA	0.00189546	333.NoPuro	PLA
333.NoPuro_PLA	-0.000831737	333.NoPuro	PLA
333.NoPuro_PLA	0.0117615	333.NoPuro	PLA
333.NoPuro_PLA	0.0181049	333.NoPuro	PLA
333.NoPuro_PLA	0.0193117	333.NoPuro	PLA
333.NoPuro_PLA	0.0229867	333.NoPuro	PLA
333.NoPuro_PLA	-0.00244775	333.NoPuro	PLA
333.NoPuro_PLA	-0.00125487	333.NoPuro	PLA
333.NoPuro_PLA	0.00963848	333.NoPuro	PLA
333.NoPuro_PLA	-0.00320056	333.NoPuro	PLA
333.NoPuro_PLA	0.0100175	333.NoPuro	PLA
333.NoPuro_PLA	0.0206716	333.NoPuro	PLA
333.NoPuro_PLA	0.0129353	333.NoPuro	PLA
333.NoPuro_PLA	-0.00156615	333.NoPuro	PLA
333.NoPuro_PLA	0.000293435	333.NoPuro	PLA
333.NoPuro_PLA	0.0135806	333.NoPuro	PLA
333.NoPuro_PLA	0.0128992	333.NoPuro	PLA
333.NoPuro_PLA	-0.000786848	333.NoPuro	PLA
333.NoPuro_PLA	0.00266815	333.NoPuro	PLA
333.NoPuro_PLA	0.00463297	333.NoPuro	PLA
333.NoPuro_PLA	0.00652861	333.NoPuro	PLA
333.NoPuro_PLA	0.00800186	333.NoPuro	PLA
333.NoPuro_PLA	0.0291307	333.NoPuro	PLA
333.NoPuro_PLA	0.0119322	333.NoPuro	PLA
333.NoPuro_PLA	0.0150715	333.NoPuro	PLA
333.NoPuro_PLA	0.0321383	333.NoPuro	PLA
333.NoPuro_PLA	0.00893497	333.NoPuro	PLA
333.NoPuro_PLA		333.NoPuro	PLA
333.NoPuro_PLA		333.NoPuro	PLA
333.NoPuro_PLA		333.NoPuro	PLA
333.NoPuro_PLA		333.NoPuro	PLA
333.NoPuro_PLA		333.NoPuro	PLA
333.NoPuro_PLA		333.NoPuro	PLA
333.NoPuro_PLA		333.NoPuro	PLA
333.NoPuro_PLA		333.NoPuro	PLA
333.NoPuro_PLA	0.00295958	333.NoPuro	PLA
333.NoPuro_PLA	-2.62e-05	333.NoPuro	PLA
333.NoPuro_PLA	0.000838135	333.NoPuro	PLA
333.NoPuro_PLA	0.0251203	333.NoPuro	PLA
333.NoPuro_PLA	0.00696164	333.NoPuro	PLA
333.NoPuro_PLA	0.0298359	333.NoPuro	PLA
333.NoPuro_PLA	0.0104511	333.NoPuro	PLA
333.NoPuro_PLA	0.0274606	333.NoPuro	PLA
333.NoPuro_PLA	0.0193905	333.NoPuro	PLA
333.NoPuro_PLA	0.0271498	333.NoPuro	PLA
333.NoPuro_PLA	0.00941784	333.NoPuro	PLA
333.NoPuro_PLA	0.0234206	333.NoPuro	PLA
333.NoPuro_PLA	0.0169323	333.NoPuro	PLA
333.NoPuro_PLA	0.00915903	333.NoPuro	PLA
333.NoPuro_PLA	0.0163567	333.NoPuro	PLA
333.NoPuro_PLA	0.0230249	333.NoPuro	PLA
333.NoPuro_PLA	0.0218924	333.NoPuro	PLA
333.NoPuro_PLA	0.0503655	333.NoPuro	PLA
333.NoPuro_PLA	0.00697538	333.NoPuro	PLA
333.NoPuro_PLA	0.00933765	333.NoPuro	PLA
333.NoPuro_PLA	0.0404938	333.NoPuro	PLA
333.NoPuro_PLA	0.0324237	333.NoPuro	PLA
333.NoPuro_PLA	0.0119737	333.NoPuro	PLA
333.NoPuro_PLA	0.00280344	333.NoPuro	PLA
333.NoPuro_PLA	0.0263911	333.NoPuro	PLA
333.NoPuro_PLA	0.0403949	333.NoPuro	PLA
333.NoPuro_PLA	0.0298366	333.NoPuro	PLA
333.NoPuro_PLA	0.0273744	333.NoPuro	PLA
333.NoPuro_PLA	0.0283757	333.NoPuro	PLA
333.NoPuro_PLA	0.0137164	333.NoPuro	PLA
333.NoPuro_PLA	0.0310137	333.NoPuro	PLA
333.NoPuro_PLA	0.0450295	333.NoPuro	PLA
333.NoPuro_PLA	0.009885	333.NoPuro	PLA
333.NoPuro_PLA	0.0160834	333.NoPuro	PLA
333.NoPuro_PLA	0.015391	333.NoPuro	PLA
333.NoPuro_PLA	0.0176153	333.NoPuro	PLA
333.NoPuro_PLA	-0.000997018	333.NoPuro	PLA
333.NoPuro_PLA	0.00577701	333.NoPuro	PLA
333.NoPuro_PLA	0.0151781	333.NoPuro	PLA
333.NoPuro_PLA	0.0128908	333.NoPuro	PLA
333.NoPuro_PLA	0.0190013	333.NoPuro	PLA
333.NoPuro_PLA	0.00577501	333.NoPuro	PLA
333.NoPuro_PLA	0.0201994	333.NoPuro	PLA
333.NoPuro_PLA	0.0252547	333.NoPuro	PLA
333.NoPuro_PLA	0.0237408	333.NoPuro	PLA
333.NoPuro_PLA	0.0360008	333.NoPuro	PLA
333.NoPuro_PLA	0.030334	333.NoPuro	PLA
333.NoPuro_PLA	0.024821	333.NoPuro	PLA
333.NoPuro_PLA		333.NoPuro	PLA
333.NoPuro_PLA		333.NoPuro	PLA
333.NoPuro_PLA		333.NoPuro	PLA
333.NoPuro_PLA		333.NoPuro	PLA
333.NoPuro_PLA		333.NoPuro	PLA
333.NoPuro_PLA		333.NoPuro	PLA
333.NoPuro_PLA		333.NoPuro	PLA
333.NoPuro_PLA		333.NoPuro	PLA
333.NoPuro_PLA		333.NoPuro	PLA
333.NoPuro_PLA		333.NoPuro	PLA
333.NoPuro_PLA		333.NoPuro	PLA
333.NoPuro_PLA		333.NoPuro	PLA
333.NoPuro_PLA	0.0350847	333.NoPuro	PLA
333.NoPuro_PLA	0.145473	333.NoPuro	PLA
333.NoPuro_PLA	0.0906512	333.NoPuro	PLA
333.NoPuro_PLA	0.0553091	333.NoPuro	PLA
333.NoPuro_PLA	0.0800533	333.NoPuro	PLA
333.NoPuro_PLA	0.0773282	333.NoPuro	PLA
333.NoPuro_PLA	0.0699498	333.NoPuro	PLA
333.NoPuro_PLA	0.0714753	333.NoPuro	PLA
333.NoPuro_PLA	0.0532009	333.NoPuro	PLA
333.NoPuro_PLA	0.111706	333.NoPuro	PLA
333.NoPuro_PLA	0.0802513	333.NoPuro	PLA
333.NoPuro_PLA	0.0737927	333.NoPuro	PLA
333.NoPuro_PLA	0.1312	333.NoPuro	PLA
333.NoPuro_PLA	0.109269	333.NoPuro	PLA
333.NoPuro_PLA	0.16304	333.NoPuro	PLA
333.NoPuro_PLA	0.135909	333.NoPuro	PLA
333.NoPuro_PLA	0.026221	333.NoPuro	PLA
333.NoPuro_PLA	0.0350729	333.NoPuro	PLA
333.NoPuro_PLA	0.0995235	333.NoPuro	PLA
333.NoPuro_PLA	0.0626387	333.NoPuro	PLA
333.NoPuro_PLA	0.052543	333.NoPuro	PLA
333.NoPuro_PLA	0.0507786	333.NoPuro	PLA
333.NoPuro_PLA	0.0584301	333.NoPuro	PLA
333.NoPuro_PLA	0.0704691	333.NoPuro	PLA
333.NoPuro_PLA	0.101548	333.NoPuro	PLA
333.NoPuro_PLA	0.255065	333.NoPuro	PLA
333.NoPuro_PLA	0.109	333.NoPuro	PLA
333.NoPuro_PLA	0.0648188	333.NoPuro	PLA
333.NoPuro_PLA	0.0605463	333.NoPuro	PLA
333.NoPuro_PLA	0.0750999	333.NoPuro	PLA
333.NoPuro_PLA	0.0686908	333.NoPuro	PLA
333.NoPuro_PLA	0.110871	333.NoPuro	PLA
333.NoPuro_PLA		333.NoPuro	PLA
333.NoPuro_PLA		333.NoPuro	PLA
333.NoPuro_PLA		333.NoPuro	PLA
333.NoPuro_PLA		333.NoPuro	PLA
333.NoPuro_PLA		333.NoPuro	PLA
333.NoPuro_PLA		333.NoPuro	PLA
333.NoPuro_PLA		333.NoPuro	PLA
333.NoPuro_PLA		333.NoPuro	PLA
333.Puro_IF		333.Puro	IF
333.Puro_IF		333.Puro	IF
333.Puro_IF		333.Puro	IF
333.Puro_IF		333.Puro	IF
333.Puro_IF		333.Puro	IF
333.Puro_IF		333.Puro	IF
333.Puro_IF		333.Puro	IF
333.Puro_IF		333.Puro	IF
333.Puro_IF		333.Puro	IF
333.Puro_IF		333.Puro	IF
333.Puro_IF		333.Puro	IF
333.Puro_IF		333.Puro	IF
333.Puro_IF		333.Puro	IF
333.Puro_IF		333.Puro	IF
333.Puro_IF		333.Puro	IF
333.Puro_IF		333.Puro	IF
333.Puro_IF		333.Puro	IF
333.Puro_IF		333.Puro	IF
333.Puro_IF		333.Puro	IF
333.Puro_IF		333.Puro	IF
333.Puro_IF		333.Puro	IF
333.Puro_IF		333.Puro	IF
333.Puro_IF		333.Puro	IF
333.Puro_IF		333.Puro	IF
333.Puro_IF		333.Puro	IF
333.Puro_IF		333.Puro	IF
333.Puro_IF		333.Puro	IF
333.Puro_IF		333.Puro	IF
333.Puro_IF		333.Puro	IF
333.Puro_IF		333.Puro	IF
333.Puro_IF		333.Puro	IF
333.Puro_IF		333.Puro	IF
333.Puro_IF	1.15071	333.Puro	IF
333.Puro_IF	1.43724	333.Puro	IF
333.Puro_IF	0.786592	333.Puro	IF
333.Puro_IF	1.35467	333.Puro	IF
333.Puro_IF	1.2752	333.Puro	IF
333.Puro_IF	1.4023	333.Puro	IF
333.Puro_IF	1.42604	333.Puro	IF
333.Puro_IF	1.10902	333.Puro	IF
333.Puro_IF	1.02025	333.Puro	IF
333.Puro_IF	2.2098	333.Puro	IF
333.Puro_IF	2.00251	333.Puro	IF
333.Puro_IF	1.24112	333.Puro	IF
333.Puro_IF	1.22146	333.Puro	IF
333.Puro_IF	0.828884	333.Puro	IF
333.Puro_IF	1.16188	333.Puro	IF
333.Puro_IF	3.02131	333.Puro	IF
333.Puro_IF	1.27689	333.Puro	IF
333.Puro_IF	1.93643	333.Puro	IF
333.Puro_IF	1.65205	333.Puro	IF
333.Puro_IF	1.14186	333.Puro	IF
333.Puro_IF	0.470963	333.Puro	IF
333.Puro_IF	0.502679	333.Puro	IF
333.Puro_IF	0.707363	333.Puro	IF
333.Puro_IF	0.229948	333.Puro	IF
333.Puro_IF	0.483478	333.Puro	IF
333.Puro_IF	0.654965	333.Puro	IF
333.Puro_IF	0.239794	333.Puro	IF
333.Puro_IF	0.579307	333.Puro	IF
333.Puro_IF	0.383123	333.Puro	IF
333.Puro_IF	0.805324	333.Puro	IF
333.Puro_IF	0.621745	333.Puro	IF
333.Puro_IF	0.610057	333.Puro	IF
333.Puro_IF	0.538775	333.Puro	IF
333.Puro_IF	0.556504	333.Puro	IF
333.Puro_IF	0.674533	333.Puro	IF
333.Puro_IF	0.650022	333.Puro	IF
333.Puro_IF	0.24987	333.Puro	IF
333.Puro_IF	0.353374	333.Puro	IF
333.Puro_IF	0.299708	333.Puro	IF
333.Puro_IF	0.26848	333.Puro	IF
333.Puro_IF	0.494612	333.Puro	IF
333.Puro_IF	0.484256	333.Puro	IF
333.Puro_IF	0.311323	333.Puro	IF
333.Puro_IF	0.42263	333.Puro	IF
333.Puro_IF	0.871096	333.Puro	IF
333.Puro_IF	0.809125	333.Puro	IF
333.Puro_IF	0.486971	333.Puro	IF
333.Puro_IF	0.607882	333.Puro	IF
333.Puro_IF	0.957581	333.Puro	IF
333.Puro_IF	1.42969	333.Puro	IF
333.Puro_IF	2.02189	333.Puro	IF
333.Puro_IF	0.8104	333.Puro	IF
333.Puro_IF	1.44727	333.Puro	IF
333.Puro_IF	0.757708	333.Puro	IF
333.Puro_IF	0.740697	333.Puro	IF
333.Puro_IF	1.01863	333.Puro	IF
333.Puro_IF	0.855682	333.Puro	IF
333.Puro_IF	0.552546	333.Puro	IF
333.Puro_IF	1.57328	333.Puro	IF
333.Puro_IF	1.58762	333.Puro	IF
333.Puro_IF	1.04252	333.Puro	IF
333.Puro_IF	0.82221	333.Puro	IF
333.Puro_IF	1.65325	333.Puro	IF
333.Puro_IF	0.990085	333.Puro	IF
333.Puro_IF	0.767077	333.Puro	IF
333.Puro_IF	1.23318	333.Puro	IF
333.Puro_IF	0.828299	333.Puro	IF
333.Puro_IF	0.758772	333.Puro	IF
333.Puro_IF	0.751213	333.Puro	IF
333.Puro_IF	1.77404	333.Puro	IF
333.Puro_IF	0.660986	333.Puro	IF
333.Puro_IF	1.06537	333.Puro	IF
333.Puro_IF	0.569855	333.Puro	IF
333.Puro_IF	0.778621	333.Puro	IF
333.Puro_IF	0.810938	333.Puro	IF
333.Puro_IF	0.722842	333.Puro	IF
333.Puro_IF	0.726386	333.Puro	IF
333.Puro_IF	0.853935	333.Puro	IF
333.Puro_IF	1.18278	333.Puro	IF
333.Puro_IF	0.538311	333.Puro	IF
333.Puro_IF	0.949526	333.Puro	IF
333.Puro_IF	0.862514	333.Puro	IF
333.Puro_IF	1.2679	333.Puro	IF
333.Puro_IF	1.08578	333.Puro	IF
333.Puro_IF	1.35511	333.Puro	IF
333.Puro_IF	1.36276	333.Puro	IF
333.Puro_IF	0.934589	333.Puro	IF
333.Puro_IF	0.909417	333.Puro	IF
333.Puro_IF		333.Puro	IF
333.Puro_IF		333.Puro	IF
333.Puro_IF		333.Puro	IF
333.Puro_IF		333.Puro	IF
333.Puro_IF		333.Puro	IF
333.Puro_IF		333.Puro	IF
333.Puro_IF		333.Puro	IF
333.Puro_IF		333.Puro	IF
333.Puro_IF		333.Puro	IF
333.Puro_IF		333.Puro	IF
333.Puro_IF		333.Puro	IF
333.Puro_IF		333.Puro	IF
333.Puro_IF	1.02557	333.Puro	IF
333.Puro_IF	0.51418	333.Puro	IF
333.Puro_IF	0.573159	333.Puro	IF
333.Puro_IF	0.834317	333.Puro	IF
333.Puro_IF	0.782414	333.Puro	IF
333.Puro_IF	0.879405	333.Puro	IF
333.Puro_IF	1.09257	333.Puro	IF
333.Puro_IF	1.43735	333.Puro	IF
333.Puro_IF	1.08205	333.Puro	IF
333.Puro_IF	1.32907	333.Puro	IF
333.Puro_IF	1.06433	333.Puro	IF
333.Puro_IF	1.14484	333.Puro	IF
333.Puro_IF	0.739483	333.Puro	IF
333.Puro_IF	1.29968	333.Puro	IF
333.Puro_IF	0.89551	333.Puro	IF
333.Puro_IF	1.79193	333.Puro	IF
333.Puro_IF	1.00123	333.Puro	IF
333.Puro_IF	0.550056	333.Puro	IF
333.Puro_IF	0.385197	333.Puro	IF
333.Puro_IF	1.11897	333.Puro	IF
333.Puro_IF	0.712857	333.Puro	IF
333.Puro_IF	0.951991	333.Puro	IF
333.Puro_IF	0.730452	333.Puro	IF
333.Puro_IF	1.17972	333.Puro	IF
333.Puro_IF	0.842205	333.Puro	IF
333.Puro_IF	0.687372	333.Puro	IF
333.Puro_IF	1.51016	333.Puro	IF
333.Puro_IF	0.865044	333.Puro	IF
333.Puro_IF	0.89426	333.Puro	IF
333.Puro_IF	0.824902	333.Puro	IF
333.Puro_IF	2.11624	333.Puro	IF
333.Puro_IF	1.1435	333.Puro	IF
333.Puro_IF		333.Puro	IF
333.Puro_IF		333.Puro	IF
333.Puro_IF		333.Puro	IF
333.Puro_IF		333.Puro	IF
333.Puro_IF		333.Puro	IF
333.Puro_IF		333.Puro	IF
333.Puro_IF		333.Puro	IF
333.Puro_IF		333.Puro	IF
333.Puro_PLA	0.486874	333.Puro	PLA
333.Puro_PLA	0.510813	333.Puro	PLA
333.Puro_PLA	0.326174	333.Puro	PLA
333.Puro_PLA	0.977328	333.Puro	PLA
333.Puro_PLA	0.540359	333.Puro	PLA
333.Puro_PLA	0.453601	333.Puro	PLA
333.Puro_PLA	0.273492	333.Puro	PLA
333.Puro_PLA	1.03571	333.Puro	PLA
333.Puro_PLA	0.633431	333.Puro	PLA
333.Puro_PLA	0.330974	333.Puro	PLA
333.Puro_PLA	0.572251	333.Puro	PLA
333.Puro_PLA	0.690874	333.Puro	PLA
333.Puro_PLA	0.5626	333.Puro	PLA
333.Puro_PLA	0.792511	333.Puro	PLA
333.Puro_PLA	0.661797	333.Puro	PLA
333.Puro_PLA	0.776149	333.Puro	PLA
333.Puro_PLA	0.375227	333.Puro	PLA
333.Puro_PLA	0.809117	333.Puro	PLA
333.Puro_PLA	0.666441	333.Puro	PLA
333.Puro_PLA	0.621132	333.Puro	PLA
333.Puro_PLA	0.501518	333.Puro	PLA
333.Puro_PLA	0.63759	333.Puro	PLA
333.Puro_PLA	1.13021	333.Puro	PLA
333.Puro_PLA	0.482707	333.Puro	PLA
333.Puro_PLA	0.479178	333.Puro	PLA
333.Puro_PLA	0.960938	333.Puro	PLA
333.Puro_PLA	0.586216	333.Puro	PLA
333.Puro_PLA	0.681805	333.Puro	PLA
333.Puro_PLA	0.80031	333.Puro	PLA
333.Puro_PLA	0.837165	333.Puro	PLA
333.Puro_PLA	0.733843	333.Puro	PLA
333.Puro_PLA	1.14304	333.Puro	PLA
333.Puro_PLA	3.1176	333.Puro	PLA
333.Puro_PLA	1.1324	333.Puro	PLA
333.Puro_PLA	0.516982	333.Puro	PLA
333.Puro_PLA	1.44365	333.Puro	PLA
333.Puro_PLA	0.643301	333.Puro	PLA
333.Puro_PLA	0.688926	333.Puro	PLA
333.Puro_PLA	0.953342	333.Puro	PLA
333.Puro_PLA	1.19766	333.Puro	PLA
333.Puro_PLA	0.731704	333.Puro	PLA
333.Puro_PLA	1.16159	333.Puro	PLA
333.Puro_PLA	0.654673	333.Puro	PLA
333.Puro_PLA	0.73274	333.Puro	PLA
333.Puro_PLA	1.5955	333.Puro	PLA
333.Puro_PLA	1.00278	333.Puro	PLA
333.Puro_PLA	0.473875	333.Puro	PLA
333.Puro_PLA	0.895429	333.Puro	PLA
333.Puro_PLA	1.54547	333.Puro	PLA
333.Puro_PLA	1.44668	333.Puro	PLA
333.Puro_PLA	0.975519	333.Puro	PLA
333.Puro_PLA	0.639883	333.Puro	PLA
333.Puro_PLA	0.965276	333.Puro	PLA
333.Puro_PLA	0.0301889	333.Puro	PLA
333.Puro_PLA	1.20807	333.Puro	PLA
333.Puro_PLA	2.01202	333.Puro	PLA
333.Puro_PLA	0.170794	333.Puro	PLA
333.Puro_PLA	0.844637	333.Puro	PLA
333.Puro_PLA	0.771486	333.Puro	PLA
333.Puro_PLA	1.2317	333.Puro	PLA
333.Puro_PLA	0.611754	333.Puro	PLA
333.Puro_PLA	0.851469	333.Puro	PLA
333.Puro_PLA	0.383957	333.Puro	PLA
333.Puro_PLA	1.36894	333.Puro	PLA
333.Puro_PLA		333.Puro	PLA
333.Puro_PLA		333.Puro	PLA
333.Puro_PLA		333.Puro	PLA
333.Puro_PLA		333.Puro	PLA
333.Puro_PLA		333.Puro	PLA
333.Puro_PLA		333.Puro	PLA
333.Puro_PLA		333.Puro	PLA
333.Puro_PLA		333.Puro	PLA
333.Puro_PLA	0.921015	333.Puro	PLA
333.Puro_PLA	1.10383	333.Puro	PLA
333.Puro_PLA	0.806926	333.Puro	PLA
333.Puro_PLA	0.952965	333.Puro	PLA
333.Puro_PLA	1.37567	333.Puro	PLA
333.Puro_PLA	1.46193	333.Puro	PLA
333.Puro_PLA	1.12037	333.Puro	PLA
333.Puro_PLA	1.0124	333.Puro	PLA
333.Puro_PLA	1.09903	333.Puro	PLA
333.Puro_PLA	0.874301	333.Puro	PLA
333.Puro_PLA	1.2179	333.Puro	PLA
333.Puro_PLA	1.00748	333.Puro	PLA
333.Puro_PLA	0.565922	333.Puro	PLA
333.Puro_PLA	0.912709	333.Puro	PLA
333.Puro_PLA	0.486398	333.Puro	PLA
333.Puro_PLA	0.959058	333.Puro	PLA
333.Puro_PLA	0.482428	333.Puro	PLA
333.Puro_PLA	0.649408	333.Puro	PLA
333.Puro_PLA	1.25925	333.Puro	PLA
333.Puro_PLA	0.629789	333.Puro	PLA
333.Puro_PLA	0.560173	333.Puro	PLA
333.Puro_PLA	0.461236	333.Puro	PLA
333.Puro_PLA	0.774159	333.Puro	PLA
333.Puro_PLA	0.964006	333.Puro	PLA
333.Puro_PLA	1.17449	333.Puro	PLA
333.Puro_PLA	0.840789	333.Puro	PLA
333.Puro_PLA	1.07844	333.Puro	PLA
333.Puro_PLA	1.51806	333.Puro	PLA
333.Puro_PLA	1.34263	333.Puro	PLA
333.Puro_PLA	1.2084	333.Puro	PLA
333.Puro_PLA	1.17952	333.Puro	PLA
333.Puro_PLA	1.44617	333.Puro	PLA
333.Puro_PLA	1.46286	333.Puro	PLA
333.Puro_PLA	0.840054	333.Puro	PLA
333.Puro_PLA	1.37642	333.Puro	PLA
333.Puro_PLA	1.03954	333.Puro	PLA
333.Puro_PLA	0.655878	333.Puro	PLA
333.Puro_PLA	0.868983	333.Puro	PLA
333.Puro_PLA	1.44472	333.Puro	PLA
333.Puro_PLA	0.961664	333.Puro	PLA
333.Puro_PLA	0.896644	333.Puro	PLA
333.Puro_PLA	1.16864	333.Puro	PLA
333.Puro_PLA	1.41392	333.Puro	PLA
333.Puro_PLA	0.811206	333.Puro	PLA
333.Puro_PLA	1.07916	333.Puro	PLA
333.Puro_PLA	0.737491	333.Puro	PLA
333.Puro_PLA	0.908055	333.Puro	PLA
333.Puro_PLA	0.887926	333.Puro	PLA
333.Puro_PLA		333.Puro	PLA
333.Puro_PLA		333.Puro	PLA
333.Puro_PLA		333.Puro	PLA
333.Puro_PLA		333.Puro	PLA
333.Puro_PLA		333.Puro	PLA
333.Puro_PLA		333.Puro	PLA
333.Puro_PLA		333.Puro	PLA
333.Puro_PLA		333.Puro	PLA
333.Puro_PLA		333.Puro	PLA
333.Puro_PLA		333.Puro	PLA
333.Puro_PLA		333.Puro	PLA
333.Puro_PLA		333.Puro	PLA
333.Puro_PLA	1.99435	333.Puro	PLA
333.Puro_PLA	0.59447	333.Puro	PLA
333.Puro_PLA	1.05849	333.Puro	PLA
333.Puro_PLA	1.36956	333.Puro	PLA
333.Puro_PLA	0.540733	333.Puro	PLA
333.Puro_PLA	0.872538	333.Puro	PLA
333.Puro_PLA	0.628409	333.Puro	PLA
333.Puro_PLA	1.12969	333.Puro	PLA
333.Puro_PLA	0.650694	333.Puro	PLA
333.Puro_PLA	0.699493	333.Puro	PLA
333.Puro_PLA	0.867691	333.Puro	PLA
333.Puro_PLA	1.74113	333.Puro	PLA
333.Puro_PLA	1.09444	333.Puro	PLA
333.Puro_PLA	2.10395	333.Puro	PLA
333.Puro_PLA	0.560633	333.Puro	PLA
333.Puro_PLA	1.06045	333.Puro	PLA
333.Puro_PLA	2.36754	333.Puro	PLA
333.Puro_PLA	0.698644	333.Puro	PLA
333.Puro_PLA	1.55494	333.Puro	PLA
333.Puro_PLA	2.14082	333.Puro	PLA
333.Puro_PLA	1.10511	333.Puro	PLA
333.Puro_PLA	0.565054	333.Puro	PLA
333.Puro_PLA	0.550095	333.Puro	PLA
333.Puro_PLA	0.627305	333.Puro	PLA
333.Puro_PLA	0.391114	333.Puro	PLA
333.Puro_PLA	0.490536	333.Puro	PLA
333.Puro_PLA	0.500041	333.Puro	PLA
333.Puro_PLA	0.746498	333.Puro	PLA
333.Puro_PLA	1.03687	333.Puro	PLA
333.Puro_PLA	0.774073	333.Puro	PLA
333.Puro_PLA	0.815582	333.Puro	PLA
333.Puro_PLA	0.669059	333.Puro	PLA
333.Puro_PLA		333.Puro	PLA
333.Puro_PLA		333.Puro	PLA
333.Puro_PLA		333.Puro	PLA
333.Puro_PLA		333.Puro	PLA
333.Puro_PLA		333.Puro	PLA
333.Puro_PLA		333.Puro	PLA
333.Puro_PLA		333.Puro	PLA
333.Puro_PLA		333.Puro	PLA
333.EmtPuro_IF		333.EmtPuro	IF
333.EmtPuro_IF		333.EmtPuro	IF
333.EmtPuro_IF		333.EmtPuro	IF
333.EmtPuro_IF		333.EmtPuro	IF
333.EmtPuro_IF		333.EmtPuro	IF
333.EmtPuro_IF		333.EmtPuro	IF
333.EmtPuro_IF		333.EmtPuro	IF
333.EmtPuro_IF		333.EmtPuro	IF
333.EmtPuro_IF		333.EmtPuro	IF
333.EmtPuro_IF		333.EmtPuro	IF
333.EmtPuro_IF		333.EmtPuro	IF
333.EmtPuro_IF		333.EmtPuro	IF
333.EmtPuro_IF		333.EmtPuro	IF
333.EmtPuro_IF		333.EmtPuro	IF
333.EmtPuro_IF		333.EmtPuro	IF
333.EmtPuro_IF		333.EmtPuro	IF
333.EmtPuro_IF		333.EmtPuro	IF
333.EmtPuro_IF		333.EmtPuro	IF
333.EmtPuro_IF		333.EmtPuro	IF
333.EmtPuro_IF		333.EmtPuro	IF
333.EmtPuro_IF		333.EmtPuro	IF
333.EmtPuro_IF		333.EmtPuro	IF
333.EmtPuro_IF		333.EmtPuro	IF
333.EmtPuro_IF		333.EmtPuro	IF
333.EmtPuro_IF		333.EmtPuro	IF
333.EmtPuro_IF		333.EmtPuro	IF
333.EmtPuro_IF		333.EmtPuro	IF
333.EmtPuro_IF		333.EmtPuro	IF
333.EmtPuro_IF		333.EmtPuro	IF
333.EmtPuro_IF		333.EmtPuro	IF
333.EmtPuro_IF		333.EmtPuro	IF
333.EmtPuro_IF		333.EmtPuro	IF
333.EmtPuro_IF	1.0235	333.EmtPuro	IF
333.EmtPuro_IF	1.1618	333.EmtPuro	IF
333.EmtPuro_IF	1.13745	333.EmtPuro	IF
333.EmtPuro_IF	1.49659	333.EmtPuro	IF
333.EmtPuro_IF	1.82474	333.EmtPuro	IF
333.EmtPuro_IF	1.06395	333.EmtPuro	IF
333.EmtPuro_IF	0.318911	333.EmtPuro	IF
333.EmtPuro_IF	0.357746	333.EmtPuro	IF
333.EmtPuro_IF	1.15337	333.EmtPuro	IF
333.EmtPuro_IF	1.6165	333.EmtPuro	IF
333.EmtPuro_IF	1.08567	333.EmtPuro	IF
333.EmtPuro_IF	1.10844	333.EmtPuro	IF
333.EmtPuro_IF	0.641082	333.EmtPuro	IF
333.EmtPuro_IF	0.636234	333.EmtPuro	IF
333.EmtPuro_IF	1.02571	333.EmtPuro	IF
333.EmtPuro_IF	0.998171	333.EmtPuro	IF
333.EmtPuro_IF	0.896033	333.EmtPuro	IF
333.EmtPuro_IF	1.41603	333.EmtPuro	IF
333.EmtPuro_IF	0.900086	333.EmtPuro	IF
333.EmtPuro_IF	0.661698	333.EmtPuro	IF
333.EmtPuro_IF	1.40178	333.EmtPuro	IF
333.EmtPuro_IF	0.839149	333.EmtPuro	IF
333.EmtPuro_IF	0.78198	333.EmtPuro	IF
333.EmtPuro_IF	0.771371	333.EmtPuro	IF
333.EmtPuro_IF	0.492222	333.EmtPuro	IF
333.EmtPuro_IF	1.06195	333.EmtPuro	IF
333.EmtPuro_IF	1.30901	333.EmtPuro	IF
333.EmtPuro_IF	0.54494	333.EmtPuro	IF
333.EmtPuro_IF	1.86377	333.EmtPuro	IF
333.EmtPuro_IF	1.20245	333.EmtPuro	IF
333.EmtPuro_IF	0.906586	333.EmtPuro	IF
333.EmtPuro_IF	0.603863	333.EmtPuro	IF
333.EmtPuro_IF	0.55414	333.EmtPuro	IF
333.EmtPuro_IF	0.307442	333.EmtPuro	IF
333.EmtPuro_IF	1.25067	333.EmtPuro	IF
333.EmtPuro_IF	1.87038	333.EmtPuro	IF
333.EmtPuro_IF	1.10953	333.EmtPuro	IF
333.EmtPuro_IF	0.522359	333.EmtPuro	IF
333.EmtPuro_IF	1.12833	333.EmtPuro	IF
333.EmtPuro_IF	0.954368	333.EmtPuro	IF
333.EmtPuro_IF	1.38947	333.EmtPuro	IF
333.EmtPuro_IF	0.939886	333.EmtPuro	IF
333.EmtPuro_IF	0.436387	333.EmtPuro	IF
333.EmtPuro_IF	0.453332	333.EmtPuro	IF
333.EmtPuro_IF	0.823433	333.EmtPuro	IF
333.EmtPuro_IF	1.55538	333.EmtPuro	IF
333.EmtPuro_IF	0.87707	333.EmtPuro	IF
333.EmtPuro_IF	0.994542	333.EmtPuro	IF
333.EmtPuro_IF	1.28332	333.EmtPuro	IF
333.EmtPuro_IF	1.65789	333.EmtPuro	IF
333.EmtPuro_IF	0.670087	333.EmtPuro	IF
333.EmtPuro_IF	0.909606	333.EmtPuro	IF
333.EmtPuro_IF	0.675567	333.EmtPuro	IF
333.EmtPuro_IF	0.718504	333.EmtPuro	IF
333.EmtPuro_IF	0.593812	333.EmtPuro	IF
333.EmtPuro_IF	0.927003	333.EmtPuro	IF
333.EmtPuro_IF	1.14642	333.EmtPuro	IF
333.EmtPuro_IF	0.961714	333.EmtPuro	IF
333.EmtPuro_IF	1.08664	333.EmtPuro	IF
333.EmtPuro_IF	1.01945	333.EmtPuro	IF
333.EmtPuro_IF	1.35672	333.EmtPuro	IF
333.EmtPuro_IF	1.21003	333.EmtPuro	IF
333.EmtPuro_IF	1.22797	333.EmtPuro	IF
333.EmtPuro_IF	0.900758	333.EmtPuro	IF
333.EmtPuro_IF	0.627506	333.EmtPuro	IF
333.EmtPuro_IF	0.920815	333.EmtPuro	IF
333.EmtPuro_IF	1.15238	333.EmtPuro	IF
333.EmtPuro_IF	0.725412	333.EmtPuro	IF
333.EmtPuro_IF	0.710335	333.EmtPuro	IF
333.EmtPuro_IF	1.02826	333.EmtPuro	IF
333.EmtPuro_IF	0.871449	333.EmtPuro	IF
333.EmtPuro_IF	1.16977	333.EmtPuro	IF
333.EmtPuro_IF	1.32812	333.EmtPuro	IF
333.EmtPuro_IF	0.732353	333.EmtPuro	IF
333.EmtPuro_IF	1.33648	333.EmtPuro	IF
333.EmtPuro_IF	0.898256	333.EmtPuro	IF
333.EmtPuro_IF	0.671174	333.EmtPuro	IF
333.EmtPuro_IF	1.63784	333.EmtPuro	IF
333.EmtPuro_IF	0.865571	333.EmtPuro	IF
333.EmtPuro_IF	0.573954	333.EmtPuro	IF
333.EmtPuro_IF	0.841729	333.EmtPuro	IF
333.EmtPuro_IF	0.635851	333.EmtPuro	IF
333.EmtPuro_IF	0.902485	333.EmtPuro	IF
333.EmtPuro_IF	0.736524	333.EmtPuro	IF
333.EmtPuro_IF	1.55061	333.EmtPuro	IF
333.EmtPuro_IF	1.42208	333.EmtPuro	IF
333.EmtPuro_IF	2.07325	333.EmtPuro	IF
333.EmtPuro_IF	0.772807	333.EmtPuro	IF
333.EmtPuro_IF		333.EmtPuro	IF
333.EmtPuro_IF		333.EmtPuro	IF
333.EmtPuro_IF		333.EmtPuro	IF
333.EmtPuro_IF		333.EmtPuro	IF
333.EmtPuro_IF		333.EmtPuro	IF
333.EmtPuro_IF		333.EmtPuro	IF
333.EmtPuro_IF		333.EmtPuro	IF
333.EmtPuro_IF		333.EmtPuro	IF
333.EmtPuro_IF		333.EmtPuro	IF
333.EmtPuro_IF		333.EmtPuro	IF
333.EmtPuro_IF		333.EmtPuro	IF
333.EmtPuro_IF		333.EmtPuro	IF
333.EmtPuro_IF	0.422641	333.EmtPuro	IF
333.EmtPuro_IF	0.43152	333.EmtPuro	IF
333.EmtPuro_IF	1.37491	333.EmtPuro	IF
333.EmtPuro_IF	0.459291	333.EmtPuro	IF
333.EmtPuro_IF	1.38519	333.EmtPuro	IF
333.EmtPuro_IF	1.12802	333.EmtPuro	IF
333.EmtPuro_IF	0.45639	333.EmtPuro	IF
333.EmtPuro_IF	1.40872	333.EmtPuro	IF
333.EmtPuro_IF	0.947308	333.EmtPuro	IF
333.EmtPuro_IF	0.693254	333.EmtPuro	IF
333.EmtPuro_IF	1.02136	333.EmtPuro	IF
333.EmtPuro_IF	1.27807	333.EmtPuro	IF
333.EmtPuro_IF	1.70903	333.EmtPuro	IF
333.EmtPuro_IF	1.64511	333.EmtPuro	IF
333.EmtPuro_IF	0.412983	333.EmtPuro	IF
333.EmtPuro_IF	0.716005	333.EmtPuro	IF
333.EmtPuro_IF	0.753172	333.EmtPuro	IF
333.EmtPuro_IF	0.450669	333.EmtPuro	IF
333.EmtPuro_IF	0.679933	333.EmtPuro	IF
333.EmtPuro_IF	0.680661	333.EmtPuro	IF
333.EmtPuro_IF	1.34797	333.EmtPuro	IF
333.EmtPuro_IF	1.53148	333.EmtPuro	IF
333.EmtPuro_IF	1.19278	333.EmtPuro	IF
333.EmtPuro_IF	1.03984	333.EmtPuro	IF
333.EmtPuro_IF	0.797332	333.EmtPuro	IF
333.EmtPuro_IF	1.19549	333.EmtPuro	IF
333.EmtPuro_IF	0.392046	333.EmtPuro	IF
333.EmtPuro_IF	1.25763	333.EmtPuro	IF
333.EmtPuro_IF	0.593272	333.EmtPuro	IF
333.EmtPuro_IF	1.02919	333.EmtPuro	IF
333.EmtPuro_IF	0.782364	333.EmtPuro	IF
333.EmtPuro_IF	0.636105	333.EmtPuro	IF
333.EmtPuro_IF		333.EmtPuro	IF
333.EmtPuro_IF		333.EmtPuro	IF
333.EmtPuro_IF		333.EmtPuro	IF
333.EmtPuro_IF		333.EmtPuro	IF
333.EmtPuro_IF		333.EmtPuro	IF
333.EmtPuro_IF		333.EmtPuro	IF
333.EmtPuro_IF		333.EmtPuro	IF
333.EmtPuro_IF		333.EmtPuro	IF
333.EmtPuro_PLA	0.243702	333.EmtPuro	PLA
333.EmtPuro_PLA	1.11966	333.EmtPuro	PLA
333.EmtPuro_PLA	1.88306	333.EmtPuro	PLA
333.EmtPuro_PLA	1.13541	333.EmtPuro	PLA
333.EmtPuro_PLA	1.33749	333.EmtPuro	PLA
333.EmtPuro_PLA	1.46262	333.EmtPuro	PLA
333.EmtPuro_PLA	1.46078	333.EmtPuro	PLA
333.EmtPuro_PLA	0.403093	333.EmtPuro	PLA
333.EmtPuro_PLA	0.738518	333.EmtPuro	PLA
333.EmtPuro_PLA	0.694138	333.EmtPuro	PLA
333.EmtPuro_PLA	0.834196	333.EmtPuro	PLA
333.EmtPuro_PLA	1.49015	333.EmtPuro	PLA
333.EmtPuro_PLA	0.578128	333.EmtPuro	PLA
333.EmtPuro_PLA	0.603089	333.EmtPuro	PLA
333.EmtPuro_PLA	1.46262	333.EmtPuro	PLA
333.EmtPuro_PLA	1.03453	333.EmtPuro	PLA
333.EmtPuro_PLA	1.27495	333.EmtPuro	PLA
333.EmtPuro_PLA	0.347207	333.EmtPuro	PLA
333.EmtPuro_PLA	0.765051	333.EmtPuro	PLA
333.EmtPuro_PLA	0.573612	333.EmtPuro	PLA
333.EmtPuro_PLA	1.70891	333.EmtPuro	PLA
333.EmtPuro_PLA	0.953633	333.EmtPuro	PLA
333.EmtPuro_PLA	1.70873	333.EmtPuro	PLA
333.EmtPuro_PLA	0.978709	333.EmtPuro	PLA
333.EmtPuro_PLA	0.990966	333.EmtPuro	PLA
333.EmtPuro_PLA	0.658071	333.EmtPuro	PLA
333.EmtPuro_PLA	1.01554	333.EmtPuro	PLA
333.EmtPuro_PLA	0.982582	333.EmtPuro	PLA
333.EmtPuro_PLA	0.462802	333.EmtPuro	PLA
333.EmtPuro_PLA	0.76067	333.EmtPuro	PLA
333.EmtPuro_PLA	0.864952	333.EmtPuro	PLA
333.EmtPuro_PLA	1.47242	333.EmtPuro	PLA
333.EmtPuro_PLA	0.65303	333.EmtPuro	PLA
333.EmtPuro_PLA	0.283811	333.EmtPuro	PLA
333.EmtPuro_PLA	0.334254	333.EmtPuro	PLA
333.EmtPuro_PLA	0.985329	333.EmtPuro	PLA
333.EmtPuro_PLA	2.10529	333.EmtPuro	PLA
333.EmtPuro_PLA	0.531704	333.EmtPuro	PLA
333.EmtPuro_PLA	0.739851	333.EmtPuro	PLA
333.EmtPuro_PLA	0.485733	333.EmtPuro	PLA
333.EmtPuro_PLA	0.896627	333.EmtPuro	PLA
333.EmtPuro_PLA	0.965012	333.EmtPuro	PLA
333.EmtPuro_PLA	0.41076	333.EmtPuro	PLA
333.EmtPuro_PLA	0.574808	333.EmtPuro	PLA
333.EmtPuro_PLA	0.726978	333.EmtPuro	PLA
333.EmtPuro_PLA	0.285222	333.EmtPuro	PLA
333.EmtPuro_PLA	0.20768	333.EmtPuro	PLA
333.EmtPuro_PLA	0.0524248	333.EmtPuro	PLA
333.EmtPuro_PLA	1.27938	333.EmtPuro	PLA
333.EmtPuro_PLA	0.368548	333.EmtPuro	PLA
333.EmtPuro_PLA	1.40302	333.EmtPuro	PLA
333.EmtPuro_PLA	0.475373	333.EmtPuro	PLA
333.EmtPuro_PLA	0.853256	333.EmtPuro	PLA
333.EmtPuro_PLA	0.960591	333.EmtPuro	PLA
333.EmtPuro_PLA	1.54021	333.EmtPuro	PLA
333.EmtPuro_PLA	0.639457	333.EmtPuro	PLA
333.EmtPuro_PLA	1.02648	333.EmtPuro	PLA
333.EmtPuro_PLA	0.634825	333.EmtPuro	PLA
333.EmtPuro_PLA	0.202826	333.EmtPuro	PLA
333.EmtPuro_PLA	1.66705	333.EmtPuro	PLA
333.EmtPuro_PLA	1.08708	333.EmtPuro	PLA
333.EmtPuro_PLA	0.40373	333.EmtPuro	PLA
333.EmtPuro_PLA	1.13956	333.EmtPuro	PLA
333.EmtPuro_PLA	1.13956	333.EmtPuro	PLA
333.EmtPuro_PLA		333.EmtPuro	PLA
333.EmtPuro_PLA		333.EmtPuro	PLA
333.EmtPuro_PLA		333.EmtPuro	PLA
333.EmtPuro_PLA		333.EmtPuro	PLA
333.EmtPuro_PLA		333.EmtPuro	PLA
333.EmtPuro_PLA		333.EmtPuro	PLA
333.EmtPuro_PLA		333.EmtPuro	PLA
333.EmtPuro_PLA		333.EmtPuro	PLA
333.EmtPuro_PLA	0.426818	333.EmtPuro	PLA
333.EmtPuro_PLA	0.659857	333.EmtPuro	PLA
333.EmtPuro_PLA	0.740898	333.EmtPuro	PLA
333.EmtPuro_PLA	1.10637	333.EmtPuro	PLA
333.EmtPuro_PLA	0.697185	333.EmtPuro	PLA
333.EmtPuro_PLA	0.723044	333.EmtPuro	PLA
333.EmtPuro_PLA	0.484833	333.EmtPuro	PLA
333.EmtPuro_PLA	0.657249	333.EmtPuro	PLA
333.EmtPuro_PLA	0.455985	333.EmtPuro	PLA
333.EmtPuro_PLA	0.591694	333.EmtPuro	PLA
333.EmtPuro_PLA	1.02439	333.EmtPuro	PLA
333.EmtPuro_PLA	0.6285	333.EmtPuro	PLA
333.EmtPuro_PLA	0.762173	333.EmtPuro	PLA
333.EmtPuro_PLA	0.87293	333.EmtPuro	PLA
333.EmtPuro_PLA	0.669243	333.EmtPuro	PLA
333.EmtPuro_PLA	0.780356	333.EmtPuro	PLA
333.EmtPuro_PLA	0.410828	333.EmtPuro	PLA
333.EmtPuro_PLA	0.531821	333.EmtPuro	PLA
333.EmtPuro_PLA	0.624806	333.EmtPuro	PLA
333.EmtPuro_PLA	0.81761	333.EmtPuro	PLA
333.EmtPuro_PLA	0.72445	333.EmtPuro	PLA
333.EmtPuro_PLA	0.904911	333.EmtPuro	PLA
333.EmtPuro_PLA	1.33773	333.EmtPuro	PLA
333.EmtPuro_PLA	0.440867	333.EmtPuro	PLA
333.EmtPuro_PLA	0.693169	333.EmtPuro	PLA
333.EmtPuro_PLA	0.768273	333.EmtPuro	PLA
333.EmtPuro_PLA	0.915765	333.EmtPuro	PLA
333.EmtPuro_PLA	0.864234	333.EmtPuro	PLA
333.EmtPuro_PLA	0.936916	333.EmtPuro	PLA
333.EmtPuro_PLA	0.872915	333.EmtPuro	PLA
333.EmtPuro_PLA	0.788409	333.EmtPuro	PLA
333.EmtPuro_PLA	0.827848	333.EmtPuro	PLA
333.EmtPuro_PLA	0.593522	333.EmtPuro	PLA
333.EmtPuro_PLA	0.632869	333.EmtPuro	PLA
333.EmtPuro_PLA	1.04517	333.EmtPuro	PLA
333.EmtPuro_PLA	0.467447	333.EmtPuro	PLA
333.EmtPuro_PLA	0.859098	333.EmtPuro	PLA
333.EmtPuro_PLA	0.749728	333.EmtPuro	PLA
333.EmtPuro_PLA	0.62411	333.EmtPuro	PLA
333.EmtPuro_PLA	0.87299	333.EmtPuro	PLA
333.EmtPuro_PLA	0.494375	333.EmtPuro	PLA
333.EmtPuro_PLA	0.638739	333.EmtPuro	PLA
333.EmtPuro_PLA	0.645382	333.EmtPuro	PLA
333.EmtPuro_PLA	0.674362	333.EmtPuro	PLA
333.EmtPuro_PLA	0.691934	333.EmtPuro	PLA
333.EmtPuro_PLA	0.51273	333.EmtPuro	PLA
333.EmtPuro_PLA	0.840684	333.EmtPuro	PLA
333.EmtPuro_PLA	0.675185	333.EmtPuro	PLA
333.EmtPuro_PLA		333.EmtPuro	PLA
333.EmtPuro_PLA		333.EmtPuro	PLA
333.EmtPuro_PLA		333.EmtPuro	PLA
333.EmtPuro_PLA		333.EmtPuro	PLA
333.EmtPuro_PLA		333.EmtPuro	PLA
333.EmtPuro_PLA		333.EmtPuro	PLA
333.EmtPuro_PLA		333.EmtPuro	PLA
333.EmtPuro_PLA		333.EmtPuro	PLA
333.EmtPuro_PLA		333.EmtPuro	PLA
333.EmtPuro_PLA		333.EmtPuro	PLA
333.EmtPuro_PLA		333.EmtPuro	PLA
333.EmtPuro_PLA		333.EmtPuro	PLA
333.EmtPuro_PLA	0.346008	333.EmtPuro	PLA
333.EmtPuro_PLA	0.560628	333.EmtPuro	PLA
333.EmtPuro_PLA	0.497778	333.EmtPuro	PLA
333.EmtPuro_PLA	0.527761	333.EmtPuro	PLA
333.EmtPuro_PLA	0.415472	333.EmtPuro	PLA
333.EmtPuro_PLA	0.31112	333.EmtPuro	PLA
333.EmtPuro_PLA	0.52463	333.EmtPuro	PLA
333.EmtPuro_PLA	0.60726	333.EmtPuro	PLA
333.EmtPuro_PLA	0.457299	333.EmtPuro	PLA
333.EmtPuro_PLA	1.12007	333.EmtPuro	PLA
333.EmtPuro_PLA	1.71619	333.EmtPuro	PLA
333.EmtPuro_PLA	0.464706	333.EmtPuro	PLA
333.EmtPuro_PLA	0.275356	333.EmtPuro	PLA
333.EmtPuro_PLA	0.277591	333.EmtPuro	PLA
333.EmtPuro_PLA	1.98629	333.EmtPuro	PLA
333.EmtPuro_PLA	1.1715	333.EmtPuro	PLA
333.EmtPuro_PLA	0.623737	333.EmtPuro	PLA
333.EmtPuro_PLA	1.51516	333.EmtPuro	PLA
333.EmtPuro_PLA	0.94272	333.EmtPuro	PLA
333.EmtPuro_PLA	2.43409	333.EmtPuro	PLA
333.EmtPuro_PLA	0.694249	333.EmtPuro	PLA
333.EmtPuro_PLA	0.966399	333.EmtPuro	PLA
333.EmtPuro_PLA	0.718955	333.EmtPuro	PLA
333.EmtPuro_PLA	1.20736	333.EmtPuro	PLA
333.EmtPuro_PLA	0.80951	333.EmtPuro	PLA
333.EmtPuro_PLA	0.902865	333.EmtPuro	PLA
333.EmtPuro_PLA	0.452232	333.EmtPuro	PLA
333.EmtPuro_PLA	0.976686	333.EmtPuro	PLA
333.EmtPuro_PLA	0.906023	333.EmtPuro	PLA
333.EmtPuro_PLA	0.616765	333.EmtPuro	PLA
333.EmtPuro_PLA	0.558383	333.EmtPuro	PLA
333.EmtPuro_PLA	0.807787	333.EmtPuro	PLA
333.EmtPuro_PLA		333.EmtPuro	PLA
333.EmtPuro_PLA		333.EmtPuro	PLA
333.EmtPuro_PLA		333.EmtPuro	PLA
333.EmtPuro_PLA		333.EmtPuro	PLA
333.EmtPuro_PLA		333.EmtPuro	PLA
333.EmtPuro_PLA		333.EmtPuro	PLA
333.EmtPuro_PLA		333.EmtPuro	PLA
333.EmtPuro_PLA		333.EmtPuro	PLA
333.EmtPuroNoHA_PLA	0.0695069	333.EmtPuroNoHA	PLA
333.EmtPuroNoHA_PLA	0.120185	333.EmtPuroNoHA	PLA
333.EmtPuroNoHA_PLA	0.0369776	333.EmtPuroNoHA	PLA
333.EmtPuroNoHA_PLA	0.127274	333.EmtPuroNoHA	PLA
333.EmtPuroNoHA_PLA	0.185245	333.EmtPuroNoHA	PLA
333.EmtPuroNoHA_PLA	0.101364	333.EmtPuroNoHA	PLA
333.EmtPuroNoHA_PLA	0.0939614	333.EmtPuroNoHA	PLA
333.EmtPuroNoHA_PLA	0.0685177	333.EmtPuroNoHA	PLA
333.EmtPuroNoHA_PLA	0.158073	333.EmtPuroNoHA	PLA
333.EmtPuroNoHA_PLA	0.0576546	333.EmtPuroNoHA	PLA
333.EmtPuroNoHA_PLA	0.0525577	333.EmtPuroNoHA	PLA
333.EmtPuroNoHA_PLA	0.0855612	333.EmtPuroNoHA	PLA
333.EmtPuroNoHA_PLA	0.0471344	333.EmtPuroNoHA	PLA
333.EmtPuroNoHA_PLA	0.133169	333.EmtPuroNoHA	PLA
333.EmtPuroNoHA_PLA	0.192435	333.EmtPuroNoHA	PLA
333.EmtPuroNoHA_PLA	0.100955	333.EmtPuroNoHA	PLA
333.EmtPuroNoHA_PLA	0.104953	333.EmtPuroNoHA	PLA
333.EmtPuroNoHA_PLA	0.110338	333.EmtPuroNoHA	PLA
333.EmtPuroNoHA_PLA	0.0885789	333.EmtPuroNoHA	PLA
333.EmtPuroNoHA_PLA	0.189856	333.EmtPuroNoHA	PLA
333.EmtPuroNoHA_PLA	0.148407	333.EmtPuroNoHA	PLA
333.EmtPuroNoHA_PLA	0.126905	333.EmtPuroNoHA	PLA
333.EmtPuroNoHA_PLA	0.0686064	333.EmtPuroNoHA	PLA
333.EmtPuroNoHA_PLA	0.154666	333.EmtPuroNoHA	PLA
333.EmtPuroNoHA_PLA	0.154666	333.EmtPuroNoHA	PLA
333.EmtPuroNoHA_PLA	0.140424	333.EmtPuroNoHA	PLA
333.EmtPuroNoHA_PLA	0.113959	333.EmtPuroNoHA	PLA
333.EmtPuroNoHA_PLA	0.0500652	333.EmtPuroNoHA	PLA
333.EmtPuroNoHA_PLA	0.170924	333.EmtPuroNoHA	PLA
333.EmtPuroNoHA_PLA	0.170402	333.EmtPuroNoHA	PLA
333.EmtPuroNoHA_PLA	0.0906637	333.EmtPuroNoHA	PLA
333.EmtPuroNoHA_PLA	0.0648122	333.EmtPuroNoHA	PLA
333.EmtPuroNoHA_PLA	0.0159649	333.EmtPuroNoHA	PLA
333.EmtPuroNoHA_PLA	0.00442618	333.EmtPuroNoHA	PLA
333.EmtPuroNoHA_PLA	0.0165242	333.EmtPuroNoHA	PLA
333.EmtPuroNoHA_PLA	0.0412662	333.EmtPuroNoHA	PLA
333.EmtPuroNoHA_PLA	0.00966202	333.EmtPuroNoHA	PLA
333.EmtPuroNoHA_PLA	0.0047978	333.EmtPuroNoHA	PLA
333.EmtPuroNoHA_PLA	0.00332309	333.EmtPuroNoHA	PLA
333.EmtPuroNoHA_PLA	0.00117871	333.EmtPuroNoHA	PLA
333.EmtPuroNoHA_PLA	0.0082425	333.EmtPuroNoHA	PLA
333.EmtPuroNoHA_PLA	0.00330542	333.EmtPuroNoHA	PLA
333.EmtPuroNoHA_PLA	0.0196583	333.EmtPuroNoHA	PLA
333.EmtPuroNoHA_PLA	0.037589	333.EmtPuroNoHA	PLA
333.EmtPuroNoHA_PLA	0.0189695	333.EmtPuroNoHA	PLA
333.EmtPuroNoHA_PLA	0.0183161	333.EmtPuroNoHA	PLA
333.EmtPuroNoHA_PLA	0.00624971	333.EmtPuroNoHA	PLA
333.EmtPuroNoHA_PLA	0.00936105	333.EmtPuroNoHA	PLA
333.EmtPuroNoHA_PLA	0.00264239	333.EmtPuroNoHA	PLA
333.EmtPuroNoHA_PLA	-0.00150728	333.EmtPuroNoHA	PLA
333.EmtPuroNoHA_PLA	0.00176889	333.EmtPuroNoHA	PLA
333.EmtPuroNoHA_PLA	0.0123326	333.EmtPuroNoHA	PLA
333.EmtPuroNoHA_PLA	0.0102073	333.EmtPuroNoHA	PLA
333.EmtPuroNoHA_PLA	-0.00142266	333.EmtPuroNoHA	PLA
333.EmtPuroNoHA_PLA	0.0095774	333.EmtPuroNoHA	PLA
333.EmtPuroNoHA_PLA	0.00850521	333.EmtPuroNoHA	PLA
333.EmtPuroNoHA_PLA	0.0035961	333.EmtPuroNoHA	PLA
333.EmtPuroNoHA_PLA	0.0227608	333.EmtPuroNoHA	PLA
333.EmtPuroNoHA_PLA	0.0279945	333.EmtPuroNoHA	PLA
333.EmtPuroNoHA_PLA	0.0137764	333.EmtPuroNoHA	PLA
333.EmtPuroNoHA_PLA	0.00170413	333.EmtPuroNoHA	PLA
333.EmtPuroNoHA_PLA	0.00393534	333.EmtPuroNoHA	PLA
333.EmtPuroNoHA_PLA	0.0354615	333.EmtPuroNoHA	PLA
333.EmtPuroNoHA_PLA	0.010289	333.EmtPuroNoHA	PLA
333.EmtPuroNoHA_PLA		333.EmtPuroNoHA	PLA
333.EmtPuroNoHA_PLA		333.EmtPuroNoHA	PLA
333.EmtPuroNoHA_PLA		333.EmtPuroNoHA	PLA
333.EmtPuroNoHA_PLA		333.EmtPuroNoHA	PLA
333.EmtPuroNoHA_PLA		333.EmtPuroNoHA	PLA
333.EmtPuroNoHA_PLA		333.EmtPuroNoHA	PLA
333.EmtPuroNoHA_PLA		333.EmtPuroNoHA	PLA
333.EmtPuroNoHA_PLA		333.EmtPuroNoHA	PLA
333.EmtPuroNoHA_PLA	0.0258485	333.EmtPuroNoHA	PLA
333.EmtPuroNoHA_PLA	0.0591721	333.EmtPuroNoHA	PLA
333.EmtPuroNoHA_PLA	0.0315643	333.EmtPuroNoHA	PLA
333.EmtPuroNoHA_PLA	0.0394985	333.EmtPuroNoHA	PLA
333.EmtPuroNoHA_PLA	0.0332671	333.EmtPuroNoHA	PLA
333.EmtPuroNoHA_PLA	0.0309528	333.EmtPuroNoHA	PLA
333.EmtPuroNoHA_PLA	0.0627355	333.EmtPuroNoHA	PLA
333.EmtPuroNoHA_PLA	0.0431199	333.EmtPuroNoHA	PLA
333.EmtPuroNoHA_PLA	0.0882917	333.EmtPuroNoHA	PLA
333.EmtPuroNoHA_PLA	0.0451863	333.EmtPuroNoHA	PLA
333.EmtPuroNoHA_PLA	0.0433787	333.EmtPuroNoHA	PLA
333.EmtPuroNoHA_PLA	0.0581518	333.EmtPuroNoHA	PLA
333.EmtPuroNoHA_PLA	0.0850031	333.EmtPuroNoHA	PLA
333.EmtPuroNoHA_PLA	0.0260024	333.EmtPuroNoHA	PLA
333.EmtPuroNoHA_PLA	0.00356389	333.EmtPuroNoHA	PLA
333.EmtPuroNoHA_PLA	0.0643713	333.EmtPuroNoHA	PLA
333.EmtPuroNoHA_PLA	0.0339821	333.EmtPuroNoHA	PLA
333.EmtPuroNoHA_PLA	0.0290167	333.EmtPuroNoHA	PLA
333.EmtPuroNoHA_PLA	0.0660725	333.EmtPuroNoHA	PLA
333.EmtPuroNoHA_PLA	0.0615468	333.EmtPuroNoHA	PLA
333.EmtPuroNoHA_PLA	0.0178829	333.EmtPuroNoHA	PLA
333.EmtPuroNoHA_PLA	0.0375504	333.EmtPuroNoHA	PLA
333.EmtPuroNoHA_PLA	0.0214662	333.EmtPuroNoHA	PLA
333.EmtPuroNoHA_PLA	0.023124	333.EmtPuroNoHA	PLA
333.EmtPuroNoHA_PLA	0.038194	333.EmtPuroNoHA	PLA
333.EmtPuroNoHA_PLA	0.0628549	333.EmtPuroNoHA	PLA
333.EmtPuroNoHA_PLA	0.0548478	333.EmtPuroNoHA	PLA
333.EmtPuroNoHA_PLA	0.0919555	333.EmtPuroNoHA	PLA
333.EmtPuroNoHA_PLA	0.0788501	333.EmtPuroNoHA	PLA
333.EmtPuroNoHA_PLA	0.0750639	333.EmtPuroNoHA	PLA
333.EmtPuroNoHA_PLA	0.0642888	333.EmtPuroNoHA	PLA
333.EmtPuroNoHA_PLA	0.0442415	333.EmtPuroNoHA	PLA
333.EmtPuroNoHA_PLA	0.0251688	333.EmtPuroNoHA	PLA
333.EmtPuroNoHA_PLA	0.0573831	333.EmtPuroNoHA	PLA
333.EmtPuroNoHA_PLA	0.033101	333.EmtPuroNoHA	PLA
333.EmtPuroNoHA_PLA	0.0292728	333.EmtPuroNoHA	PLA
333.EmtPuroNoHA_PLA	0.043937	333.EmtPuroNoHA	PLA
333.EmtPuroNoHA_PLA	0.0596775	333.EmtPuroNoHA	PLA
333.EmtPuroNoHA_PLA	0.0496508	333.EmtPuroNoHA	PLA
333.EmtPuroNoHA_PLA	0.0740309	333.EmtPuroNoHA	PLA
333.EmtPuroNoHA_PLA	0.0277209	333.EmtPuroNoHA	PLA
333.EmtPuroNoHA_PLA	0.0185317	333.EmtPuroNoHA	PLA
333.EmtPuroNoHA_PLA	0.0181329	333.EmtPuroNoHA	PLA
333.EmtPuroNoHA_PLA	0.0700498	333.EmtPuroNoHA	PLA
333.EmtPuroNoHA_PLA	0.0246282	333.EmtPuroNoHA	PLA
333.EmtPuroNoHA_PLA	0.0158866	333.EmtPuroNoHA	PLA
333.EmtPuroNoHA_PLA	0.0667852	333.EmtPuroNoHA	PLA
333.EmtPuroNoHA_PLA	0.0798586	333.EmtPuroNoHA	PLA
333.EmtPuroNoHA_PLA		333.EmtPuroNoHA	PLA
333.EmtPuroNoHA_PLA		333.EmtPuroNoHA	PLA
333.EmtPuroNoHA_PLA		333.EmtPuroNoHA	PLA
333.EmtPuroNoHA_PLA		333.EmtPuroNoHA	PLA
333.EmtPuroNoHA_PLA		333.EmtPuroNoHA	PLA
333.EmtPuroNoHA_PLA		333.EmtPuroNoHA	PLA
333.EmtPuroNoHA_PLA		333.EmtPuroNoHA	PLA
333.EmtPuroNoHA_PLA		333.EmtPuroNoHA	PLA
333.EmtPuroNoHA_PLA		333.EmtPuroNoHA	PLA
333.EmtPuroNoHA_PLA		333.EmtPuroNoHA	PLA
333.EmtPuroNoHA_PLA		333.EmtPuroNoHA	PLA
333.EmtPuroNoHA_PLA		333.EmtPuroNoHA	PLA
333.EmtPuroNoHA_PLA		333.EmtPuroNoHA	PLA
333.EmtPuroNoHA_PLA		333.EmtPuroNoHA	PLA
333.EmtPuroNoHA_PLA		333.EmtPuroNoHA	PLA
333.EmtPuroNoHA_PLA		333.EmtPuroNoHA	PLA
333.EmtPuroNoHA_PLA		333.EmtPuroNoHA	PLA
333.EmtPuroNoHA_PLA		333.EmtPuroNoHA	PLA
333.EmtPuroNoHA_PLA		333.EmtPuroNoHA	PLA
333.EmtPuroNoHA_PLA		333.EmtPuroNoHA	PLA
333.EmtPuroNoHA_PLA		333.EmtPuroNoHA	PLA
333.EmtPuroNoHA_PLA		333.EmtPuroNoHA	PLA
333.EmtPuroNoHA_PLA		333.EmtPuroNoHA	PLA
333.EmtPuroNoHA_PLA		333.EmtPuroNoHA	PLA
333.EmtPuroNoHA_PLA		333.EmtPuroNoHA	PLA
333.EmtPuroNoHA_PLA		333.EmtPuroNoHA	PLA
333.EmtPuroNoHA_PLA		333.EmtPuroNoHA	PLA
333.EmtPuroNoHA_PLA		333.EmtPuroNoHA	PLA
333.EmtPuroNoHA_PLA		333.EmtPuroNoHA	PLA
333.EmtPuroNoHA_PLA		333.EmtPuroNoHA	PLA
333.EmtPuroNoHA_PLA		333.EmtPuroNoHA	PLA
333.EmtPuroNoHA_PLA		333.EmtPuroNoHA	PLA
333.EmtPuroNoHA_PLA		333.EmtPuroNoHA	PLA
333.EmtPuroNoHA_PLA		333.EmtPuroNoHA	PLA
333.EmtPuroNoHA_PLA		333.EmtPuroNoHA	PLA
333.EmtPuroNoHA_PLA		333.EmtPuroNoHA	PLA
333.EmtPuroNoHA_PLA		333.EmtPuroNoHA	PLA
333.EmtPuroNoHA_PLA		333.EmtPuroNoHA	PLA
333.EmtPuroNoHA_PLA		333.EmtPuroNoHA	PLA
333.EmtPuroNoHA_PLA		333.EmtPuroNoHA	PLA
333.EmtPuroNoHA_PLA		333.EmtPuroNoHA	PLA
333.EmtPuroNoHA_PLA		333.EmtPuroNoHA	PLA
333.EmtPuroNoHA_PLA		333.EmtPuroNoHA	PLA
333.EmtPuroNoHA_PLA		333.EmtPuroNoHA	PLA
333.EmtPuroNoHA_PLA		333.EmtPuroNoHA	PLA
333.EmtPuroNoHA_PLA		333.EmtPuroNoHA	PLA
333.EmtPuroNoHA_PLA		333.EmtPuroNoHA	PLA
333.EmtPuroNoHA_PLA		333.EmtPuroNoHA	PLA
333.EmtPuroNoHA_PLA		333.EmtPuroNoHA	PLA
333.EmtPuroNoHA_PLA		333.EmtPuroNoHA	PLA
333.EmtPuroNoHA_PLA		333.EmtPuroNoHA	PLA
333.EmtPuroNoHA_PLA		333.EmtPuroNoHA	PLA
333.EmtPuroNoPuro_PLA	0.0442293	333.EmtPuroNoPuro	PLA
333.EmtPuroNoPuro_PLA	0.0449551	333.EmtPuroNoPuro	PLA
333.EmtPuroNoPuro_PLA	0.0194744	333.EmtPuroNoPuro	PLA
333.EmtPuroNoPuro_PLA	0.0523365	333.EmtPuroNoPuro	PLA
333.EmtPuroNoPuro_PLA	0.0696158	333.EmtPuroNoPuro	PLA
333.EmtPuroNoPuro_PLA	0.220873	333.EmtPuroNoPuro	PLA
333.EmtPuroNoPuro_PLA	0.100224	333.EmtPuroNoPuro	PLA
333.EmtPuroNoPuro_PLA	0.08659	333.EmtPuroNoPuro	PLA
333.EmtPuroNoPuro_PLA	0.108486	333.EmtPuroNoPuro	PLA
333.EmtPuroNoPuro_PLA	0.0660231	333.EmtPuroNoPuro	PLA
333.EmtPuroNoPuro_PLA	0.0576922	333.EmtPuroNoPuro	PLA
333.EmtPuroNoPuro_PLA	0.0621503	333.EmtPuroNoPuro	PLA
333.EmtPuroNoPuro_PLA	0.112969	333.EmtPuroNoPuro	PLA
333.EmtPuroNoPuro_PLA	0.126853	333.EmtPuroNoPuro	PLA
333.EmtPuroNoPuro_PLA	0.127481	333.EmtPuroNoPuro	PLA
333.EmtPuroNoPuro_PLA	0.107614	333.EmtPuroNoPuro	PLA
333.EmtPuroNoPuro_PLA	0.113162	333.EmtPuroNoPuro	PLA
333.EmtPuroNoPuro_PLA	0.114577	333.EmtPuroNoPuro	PLA
333.EmtPuroNoPuro_PLA	0.039506	333.EmtPuroNoPuro	PLA
333.EmtPuroNoPuro_PLA	0.0681578	333.EmtPuroNoPuro	PLA
333.EmtPuroNoPuro_PLA	0.0635426	333.EmtPuroNoPuro	PLA
333.EmtPuroNoPuro_PLA	0.0907864	333.EmtPuroNoPuro	PLA
333.EmtPuroNoPuro_PLA	0.103441	333.EmtPuroNoPuro	PLA
333.EmtPuroNoPuro_PLA	0.248447	333.EmtPuroNoPuro	PLA
333.EmtPuroNoPuro_PLA	0.218067	333.EmtPuroNoPuro	PLA
333.EmtPuroNoPuro_PLA	0.0910536	333.EmtPuroNoPuro	PLA
333.EmtPuroNoPuro_PLA	0.241396	333.EmtPuroNoPuro	PLA
333.EmtPuroNoPuro_PLA	0.154511	333.EmtPuroNoPuro	PLA
333.EmtPuroNoPuro_PLA	0.213369	333.EmtPuroNoPuro	PLA
333.EmtPuroNoPuro_PLA	0.225525	333.EmtPuroNoPuro	PLA
333.EmtPuroNoPuro_PLA	0.0573779	333.EmtPuroNoPuro	PLA
333.EmtPuroNoPuro_PLA	0.0258628	333.EmtPuroNoPuro	PLA
333.EmtPuroNoPuro_PLA	0.0175496	333.EmtPuroNoPuro	PLA
333.EmtPuroNoPuro_PLA	0.00814352	333.EmtPuroNoPuro	PLA
333.EmtPuroNoPuro_PLA	0.0136546	333.EmtPuroNoPuro	PLA
333.EmtPuroNoPuro_PLA	0.0136156	333.EmtPuroNoPuro	PLA
333.EmtPuroNoPuro_PLA	-0.00328408	333.EmtPuroNoPuro	PLA
333.EmtPuroNoPuro_PLA	-0.00948909	333.EmtPuroNoPuro	PLA
333.EmtPuroNoPuro_PLA	0.00546047	333.EmtPuroNoPuro	PLA
333.EmtPuroNoPuro_PLA	0.00327341	333.EmtPuroNoPuro	PLA
333.EmtPuroNoPuro_PLA	-0.00711291	333.EmtPuroNoPuro	PLA
333.EmtPuroNoPuro_PLA	0.00073828	333.EmtPuroNoPuro	PLA
333.EmtPuroNoPuro_PLA	0.0041057	333.EmtPuroNoPuro	PLA
333.EmtPuroNoPuro_PLA	-0.00652346	333.EmtPuroNoPuro	PLA
333.EmtPuroNoPuro_PLA	0.0170419	333.EmtPuroNoPuro	PLA
333.EmtPuroNoPuro_PLA	0.023486	333.EmtPuroNoPuro	PLA
333.EmtPuroNoPuro_PLA	0.0198066	333.EmtPuroNoPuro	PLA
333.EmtPuroNoPuro_PLA	0.012812	333.EmtPuroNoPuro	PLA
333.EmtPuroNoPuro_PLA	-0.00115074	333.EmtPuroNoPuro	PLA
333.EmtPuroNoPuro_PLA	0.00261111	333.EmtPuroNoPuro	PLA
333.EmtPuroNoPuro_PLA	-0.00177478	333.EmtPuroNoPuro	PLA
333.EmtPuroNoPuro_PLA	0.0114778	333.EmtPuroNoPuro	PLA
333.EmtPuroNoPuro_PLA	0.00754966	333.EmtPuroNoPuro	PLA
333.EmtPuroNoPuro_PLA	0.00639284	333.EmtPuroNoPuro	PLA
333.EmtPuroNoPuro_PLA	-0.00104699	333.EmtPuroNoPuro	PLA
333.EmtPuroNoPuro_PLA	0.00847173	333.EmtPuroNoPuro	PLA
333.EmtPuroNoPuro_PLA	-0.0037293	333.EmtPuroNoPuro	PLA
333.EmtPuroNoPuro_PLA	0.00505205	333.EmtPuroNoPuro	PLA
333.EmtPuroNoPuro_PLA	0.00241169	333.EmtPuroNoPuro	PLA
333.EmtPuroNoPuro_PLA	-0.0125313	333.EmtPuroNoPuro	PLA
333.EmtPuroNoPuro_PLA	-0.00746834	333.EmtPuroNoPuro	PLA
333.EmtPuroNoPuro_PLA	0.00106428	333.EmtPuroNoPuro	PLA
333.EmtPuroNoPuro_PLA	-0.00490304	333.EmtPuroNoPuro	PLA
333.EmtPuroNoPuro_PLA	-0.000954263	333.EmtPuroNoPuro	PLA
333.EmtPuroNoPuro_PLA		333.EmtPuroNoPuro	PLA
333.EmtPuroNoPuro_PLA		333.EmtPuroNoPuro	PLA
333.EmtPuroNoPuro_PLA		333.EmtPuroNoPuro	PLA
333.EmtPuroNoPuro_PLA		333.EmtPuroNoPuro	PLA
333.EmtPuroNoPuro_PLA		333.EmtPuroNoPuro	PLA
333.EmtPuroNoPuro_PLA		333.EmtPuroNoPuro	PLA
333.EmtPuroNoPuro_PLA		333.EmtPuroNoPuro	PLA
333.EmtPuroNoPuro_PLA		333.EmtPuroNoPuro	PLA
333.EmtPuroNoPuro_PLA	0.114478	333.EmtPuroNoPuro	PLA
333.EmtPuroNoPuro_PLA	0.0659571	333.EmtPuroNoPuro	PLA
333.EmtPuroNoPuro_PLA	0.0943912	333.EmtPuroNoPuro	PLA
333.EmtPuroNoPuro_PLA	0.193878	333.EmtPuroNoPuro	PLA
333.EmtPuroNoPuro_PLA	0.23012	333.EmtPuroNoPuro	PLA
333.EmtPuroNoPuro_PLA	0.121324	333.EmtPuroNoPuro	PLA
333.EmtPuroNoPuro_PLA	0.180658	333.EmtPuroNoPuro	PLA
333.EmtPuroNoPuro_PLA	0.130872	333.EmtPuroNoPuro	PLA
333.EmtPuroNoPuro_PLA	0.191819	333.EmtPuroNoPuro	PLA
333.EmtPuroNoPuro_PLA	0.196233	333.EmtPuroNoPuro	PLA
333.EmtPuroNoPuro_PLA	0.272174	333.EmtPuroNoPuro	PLA
333.EmtPuroNoPuro_PLA	0.186986	333.EmtPuroNoPuro	PLA
333.EmtPuroNoPuro_PLA	0.466189	333.EmtPuroNoPuro	PLA
333.EmtPuroNoPuro_PLA	0.169732	333.EmtPuroNoPuro	PLA
333.EmtPuroNoPuro_PLA	0.174477	333.EmtPuroNoPuro	PLA
333.EmtPuroNoPuro_PLA	0.168093	333.EmtPuroNoPuro	PLA
333.EmtPuroNoPuro_PLA	0.101582	333.EmtPuroNoPuro	PLA
333.EmtPuroNoPuro_PLA	0.0897584	333.EmtPuroNoPuro	PLA
333.EmtPuroNoPuro_PLA	0.119909	333.EmtPuroNoPuro	PLA
333.EmtPuroNoPuro_PLA	0.158578	333.EmtPuroNoPuro	PLA
333.EmtPuroNoPuro_PLA	0.0407803	333.EmtPuroNoPuro	PLA
333.EmtPuroNoPuro_PLA	0.130671	333.EmtPuroNoPuro	PLA
333.EmtPuroNoPuro_PLA	0.13435	333.EmtPuroNoPuro	PLA
333.EmtPuroNoPuro_PLA	0.139831	333.EmtPuroNoPuro	PLA
333.EmtPuroNoPuro_PLA	0.114234	333.EmtPuroNoPuro	PLA
333.EmtPuroNoPuro_PLA	0.191956	333.EmtPuroNoPuro	PLA
333.EmtPuroNoPuro_PLA	0.128535	333.EmtPuroNoPuro	PLA
333.EmtPuroNoPuro_PLA	0.101934	333.EmtPuroNoPuro	PLA
333.EmtPuroNoPuro_PLA	0.163909	333.EmtPuroNoPuro	PLA
333.EmtPuroNoPuro_PLA	0.120667	333.EmtPuroNoPuro	PLA
333.EmtPuroNoPuro_PLA	0.172637	333.EmtPuroNoPuro	PLA
333.EmtPuroNoPuro_PLA	0.154124	333.EmtPuroNoPuro	PLA
333.EmtPuroNoPuro_PLA	0.140461	333.EmtPuroNoPuro	PLA
333.EmtPuroNoPuro_PLA	0.123211	333.EmtPuroNoPuro	PLA
333.EmtPuroNoPuro_PLA	0.207846	333.EmtPuroNoPuro	PLA
333.EmtPuroNoPuro_PLA	0.145816	333.EmtPuroNoPuro	PLA
333.EmtPuroNoPuro_PLA	0.261492	333.EmtPuroNoPuro	PLA
333.EmtPuroNoPuro_PLA	0.16781	333.EmtPuroNoPuro	PLA
333.EmtPuroNoPuro_PLA	0.19299	333.EmtPuroNoPuro	PLA
333.EmtPuroNoPuro_PLA	0.114016	333.EmtPuroNoPuro	PLA
333.EmtPuroNoPuro_PLA	0.141991	333.EmtPuroNoPuro	PLA
333.EmtPuroNoPuro_PLA	0.156246	333.EmtPuroNoPuro	PLA
333.EmtPuroNoPuro_PLA	0.0945883	333.EmtPuroNoPuro	PLA
333.EmtPuroNoPuro_PLA	0.109296	333.EmtPuroNoPuro	PLA
333.EmtPuroNoPuro_PLA	0.0325728	333.EmtPuroNoPuro	PLA
333.EmtPuroNoPuro_PLA	0.0523483	333.EmtPuroNoPuro	PLA
333.EmtPuroNoPuro_PLA	0.174966	333.EmtPuroNoPuro	PLA
333.EmtPuroNoPuro_PLA	0.168919	333.EmtPuroNoPuro	PLA
333.EmtPuroNoPuro_PLA		333.EmtPuroNoPuro	PLA
333.EmtPuroNoPuro_PLA		333.EmtPuroNoPuro	PLA
333.EmtPuroNoPuro_PLA		333.EmtPuroNoPuro	PLA
333.EmtPuroNoPuro_PLA		333.EmtPuroNoPuro	PLA
333.EmtPuroNoPuro_PLA		333.EmtPuroNoPuro	PLA
333.EmtPuroNoPuro_PLA		333.EmtPuroNoPuro	PLA
333.EmtPuroNoPuro_PLA		333.EmtPuroNoPuro	PLA
333.EmtPuroNoPuro_PLA		333.EmtPuroNoPuro	PLA
333.EmtPuroNoPuro_PLA		333.EmtPuroNoPuro	PLA
333.EmtPuroNoPuro_PLA		333.EmtPuroNoPuro	PLA
333.EmtPuroNoPuro_PLA		333.EmtPuroNoPuro	PLA
333.EmtPuroNoPuro_PLA		333.EmtPuroNoPuro	PLA
333.EmtPuroNoPuro_PLA		333.EmtPuroNoPuro	PLA
333.EmtPuroNoPuro_PLA		333.EmtPuroNoPuro	PLA
333.EmtPuroNoPuro_PLA		333.EmtPuroNoPuro	PLA
333.EmtPuroNoPuro_PLA		333.EmtPuroNoPuro	PLA
333.EmtPuroNoPuro_PLA		333.EmtPuroNoPuro	PLA
333.EmtPuroNoPuro_PLA		333.EmtPuroNoPuro	PLA
333.EmtPuroNoPuro_PLA		333.EmtPuroNoPuro	PLA
333.EmtPuroNoPuro_PLA		333.EmtPuroNoPuro	PLA
333.EmtPuroNoPuro_PLA		333.EmtPuroNoPuro	PLA
333.EmtPuroNoPuro_PLA		333.EmtPuroNoPuro	PLA
333.EmtPuroNoPuro_PLA		333.EmtPuroNoPuro	PLA
333.EmtPuroNoPuro_PLA		333.EmtPuroNoPuro	PLA
333.EmtPuroNoPuro_PLA		333.EmtPuroNoPuro	PLA
333.EmtPuroNoPuro_PLA		333.EmtPuroNoPuro	PLA
333.EmtPuroNoPuro_PLA		333.EmtPuroNoPuro	PLA
333.EmtPuroNoPuro_PLA		333.EmtPuroNoPuro	PLA
333.EmtPuroNoPuro_PLA		333.EmtPuroNoPuro	PLA
333.EmtPuroNoPuro_PLA		333.EmtPuroNoPuro	PLA
333.EmtPuroNoPuro_PLA		333.EmtPuroNoPuro	PLA
333.EmtPuroNoPuro_PLA		333.EmtPuroNoPuro	PLA
333.EmtPuroNoPuro_PLA		333.EmtPuroNoPuro	PLA
333.EmtPuroNoPuro_PLA		333.EmtPuroNoPuro	PLA
333.EmtPuroNoPuro_PLA		333.EmtPuroNoPuro	PLA
333.EmtPuroNoPuro_PLA		333.EmtPuroNoPuro	PLA
333.EmtPuroNoPuro_PLA		333.EmtPuroNoPuro	PLA
333.EmtPuroNoPuro_PLA		333.EmtPuroNoPuro	PLA
333.EmtPuroNoPuro_PLA		333.EmtPuroNoPuro	PLA
333.EmtPuroNoPuro_PLA		333.EmtPuroNoPuro	PLA
333.EmtPuroNoPuro_PLA		333.EmtPuroNoPuro	PLA
333.EmtPuroNoPuro_PLA		333.EmtPuroNoPuro	PLA
333.EmtPuroNoPuro_PLA		333.EmtPuroNoPuro	PLA
333.EmtPuroNoPuro_PLA		333.EmtPuroNoPuro	PLA
333.EmtPuroNoPuro_PLA		333.EmtPuroNoPuro	PLA
333.EmtPuroNoPuro_PLA		333.EmtPuroNoPuro	PLA
333.EmtPuroNoPuro_PLA		333.EmtPuroNoPuro	PLA
333.EmtPuroNoPuro_PLA		333.EmtPuroNoPuro	PLA
333.EmtPuroNoPuro_PLA		333.EmtPuroNoPuro	PLA
333.EmtPuroNoPuro_PLA		333.EmtPuroNoPuro	PLA
333.EmtPuroNoPuro_PLA		333.EmtPuroNoPuro	PLA
333.EmtPuroNoPuro_PLA		333.EmtPuroNoPuro	PLA
333.AnisoPuro_IF		333.AnisoPuro	IF
333.AnisoPuro_IF		333.AnisoPuro	IF
333.AnisoPuro_IF		333.AnisoPuro	IF
333.AnisoPuro_IF		333.AnisoPuro	IF
333.AnisoPuro_IF		333.AnisoPuro	IF
333.AnisoPuro_IF		333.AnisoPuro	IF
333.AnisoPuro_IF		333.AnisoPuro	IF
333.AnisoPuro_IF		333.AnisoPuro	IF
333.AnisoPuro_IF		333.AnisoPuro	IF
333.AnisoPuro_IF		333.AnisoPuro	IF
333.AnisoPuro_IF		333.AnisoPuro	IF
333.AnisoPuro_IF		333.AnisoPuro	IF
333.AnisoPuro_IF		333.AnisoPuro	IF
333.AnisoPuro_IF		333.AnisoPuro	IF
333.AnisoPuro_IF		333.AnisoPuro	IF
333.AnisoPuro_IF		333.AnisoPuro	IF
333.AnisoPuro_IF		333.AnisoPuro	IF
333.AnisoPuro_IF		333.AnisoPuro	IF
333.AnisoPuro_IF		333.AnisoPuro	IF
333.AnisoPuro_IF		333.AnisoPuro	IF
333.AnisoPuro_IF		333.AnisoPuro	IF
333.AnisoPuro_IF		333.AnisoPuro	IF
333.AnisoPuro_IF		333.AnisoPuro	IF
333.AnisoPuro_IF		333.AnisoPuro	IF
333.AnisoPuro_IF		333.AnisoPuro	IF
333.AnisoPuro_IF		333.AnisoPuro	IF
333.AnisoPuro_IF		333.AnisoPuro	IF
333.AnisoPuro_IF		333.AnisoPuro	IF
333.AnisoPuro_IF		333.AnisoPuro	IF
333.AnisoPuro_IF		333.AnisoPuro	IF
333.AnisoPuro_IF		333.AnisoPuro	IF
333.AnisoPuro_IF		333.AnisoPuro	IF
333.AnisoPuro_IF	0.00999946	333.AnisoPuro	IF
333.AnisoPuro_IF	0.0179382	333.AnisoPuro	IF
333.AnisoPuro_IF	0.0230896	333.AnisoPuro	IF
333.AnisoPuro_IF	0.0268216	333.AnisoPuro	IF
333.AnisoPuro_IF	0.03676	333.AnisoPuro	IF
333.AnisoPuro_IF	0.0305904	333.AnisoPuro	IF
333.AnisoPuro_IF	0.0275881	333.AnisoPuro	IF
333.AnisoPuro_IF	0.0264229	333.AnisoPuro	IF
333.AnisoPuro_IF	0.0202843	333.AnisoPuro	IF
333.AnisoPuro_IF	0.0513423	333.AnisoPuro	IF
333.AnisoPuro_IF	0.0178058	333.AnisoPuro	IF
333.AnisoPuro_IF	0.0115251	333.AnisoPuro	IF
333.AnisoPuro_IF	0.017215	333.AnisoPuro	IF
333.AnisoPuro_IF	0.0195268	333.AnisoPuro	IF
333.AnisoPuro_IF	0.02842	333.AnisoPuro	IF
333.AnisoPuro_IF	0.0217544	333.AnisoPuro	IF
333.AnisoPuro_IF	0.0407159	333.AnisoPuro	IF
333.AnisoPuro_IF	0.0409472	333.AnisoPuro	IF
333.AnisoPuro_IF	0.0253744	333.AnisoPuro	IF
333.AnisoPuro_IF	0.0174201	333.AnisoPuro	IF
333.AnisoPuro_IF	0.0198739	333.AnisoPuro	IF
333.AnisoPuro_IF	0.029009	333.AnisoPuro	IF
333.AnisoPuro_IF	0.0140385	333.AnisoPuro	IF
333.AnisoPuro_IF	0.0189938	333.AnisoPuro	IF
333.AnisoPuro_IF	0.0334527	333.AnisoPuro	IF
333.AnisoPuro_IF	0.0201738	333.AnisoPuro	IF
333.AnisoPuro_IF	0.0390144	333.AnisoPuro	IF
333.AnisoPuro_IF	0.0366683	333.AnisoPuro	IF
333.AnisoPuro_IF	0.0279074	333.AnisoPuro	IF
333.AnisoPuro_IF	0.018528	333.AnisoPuro	IF
333.AnisoPuro_IF	0.0742922	333.AnisoPuro	IF
333.AnisoPuro_IF	0.0498214	333.AnisoPuro	IF
333.AnisoPuro_IF	0.0517556	333.AnisoPuro	IF
333.AnisoPuro_IF	0.0371896	333.AnisoPuro	IF
333.AnisoPuro_IF	0.0634059	333.AnisoPuro	IF
333.AnisoPuro_IF	0.0315038	333.AnisoPuro	IF
333.AnisoPuro_IF	0.0523538	333.AnisoPuro	IF
333.AnisoPuro_IF	0.0281706	333.AnisoPuro	IF
333.AnisoPuro_IF	0.0314866	333.AnisoPuro	IF
333.AnisoPuro_IF	0.0373261	333.AnisoPuro	IF
333.AnisoPuro_IF	0.0882551	333.AnisoPuro	IF
333.AnisoPuro_IF	0.0717386	333.AnisoPuro	IF
333.AnisoPuro_IF	0.0818509	333.AnisoPuro	IF
333.AnisoPuro_IF	0.0444598	333.AnisoPuro	IF
333.AnisoPuro_IF	0.328315	333.AnisoPuro	IF
333.AnisoPuro_IF	0.163616	333.AnisoPuro	IF
333.AnisoPuro_IF	0.168142	333.AnisoPuro	IF
333.AnisoPuro_IF	0.258582	333.AnisoPuro	IF
333.AnisoPuro_IF	0.413092	333.AnisoPuro	IF
333.AnisoPuro_IF	0.244783	333.AnisoPuro	IF
333.AnisoPuro_IF	0.203786	333.AnisoPuro	IF
333.AnisoPuro_IF	0.155097	333.AnisoPuro	IF
333.AnisoPuro_IF	0.48328	333.AnisoPuro	IF
333.AnisoPuro_IF	0.260699	333.AnisoPuro	IF
333.AnisoPuro_IF	0.13552	333.AnisoPuro	IF
333.AnisoPuro_IF	0.151162	333.AnisoPuro	IF
333.AnisoPuro_IF	0.393254	333.AnisoPuro	IF
333.AnisoPuro_IF	0.300773	333.AnisoPuro	IF
333.AnisoPuro_IF	0.345488	333.AnisoPuro	IF
333.AnisoPuro_IF	0.289177	333.AnisoPuro	IF
333.AnisoPuro_IF	0.142572	333.AnisoPuro	IF
333.AnisoPuro_IF	0.205226	333.AnisoPuro	IF
333.AnisoPuro_IF	0.108875	333.AnisoPuro	IF
333.AnisoPuro_IF	0.284564	333.AnisoPuro	IF
333.AnisoPuro_IF	0.0769476	333.AnisoPuro	IF
333.AnisoPuro_IF	0.0842816	333.AnisoPuro	IF
333.AnisoPuro_IF	0.0855926	333.AnisoPuro	IF
333.AnisoPuro_IF	0.344141	333.AnisoPuro	IF
333.AnisoPuro_IF	0.230464	333.AnisoPuro	IF
333.AnisoPuro_IF	0.212961	333.AnisoPuro	IF
333.AnisoPuro_IF	0.334862	333.AnisoPuro	IF
333.AnisoPuro_IF	0.248174	333.AnisoPuro	IF
333.AnisoPuro_IF	0.286332	333.AnisoPuro	IF
333.AnisoPuro_IF	0.226012	333.AnisoPuro	IF
333.AnisoPuro_IF	0.114519	333.AnisoPuro	IF
333.AnisoPuro_IF	0.254778	333.AnisoPuro	IF
333.AnisoPuro_IF	0.193078	333.AnisoPuro	IF
333.AnisoPuro_IF	0.218859	333.AnisoPuro	IF
333.AnisoPuro_IF	0.327303	333.AnisoPuro	IF
333.AnisoPuro_IF	0.266961	333.AnisoPuro	IF
333.AnisoPuro_IF	0.0894262	333.AnisoPuro	IF
333.AnisoPuro_IF	0.08492	333.AnisoPuro	IF
333.AnisoPuro_IF	0.0559023	333.AnisoPuro	IF
333.AnisoPuro_IF	0.186921	333.AnisoPuro	IF
333.AnisoPuro_IF	0.311999	333.AnisoPuro	IF
333.AnisoPuro_IF	0.206394	333.AnisoPuro	IF
333.AnisoPuro_IF	0.392853	333.AnisoPuro	IF
333.AnisoPuro_IF	0.338178	333.AnisoPuro	IF
333.AnisoPuro_IF		333.AnisoPuro	IF
333.AnisoPuro_IF		333.AnisoPuro	IF
333.AnisoPuro_IF		333.AnisoPuro	IF
333.AnisoPuro_IF		333.AnisoPuro	IF
333.AnisoPuro_IF		333.AnisoPuro	IF
333.AnisoPuro_IF		333.AnisoPuro	IF
333.AnisoPuro_IF		333.AnisoPuro	IF
333.AnisoPuro_IF		333.AnisoPuro	IF
333.AnisoPuro_IF		333.AnisoPuro	IF
333.AnisoPuro_IF		333.AnisoPuro	IF
333.AnisoPuro_IF		333.AnisoPuro	IF
333.AnisoPuro_IF		333.AnisoPuro	IF
333.AnisoPuro_IF	0.0790831	333.AnisoPuro	IF
333.AnisoPuro_IF	0.107069	333.AnisoPuro	IF
333.AnisoPuro_IF	0.0703556	333.AnisoPuro	IF
333.AnisoPuro_IF	0.0588543	333.AnisoPuro	IF
333.AnisoPuro_IF	0.101637	333.AnisoPuro	IF
333.AnisoPuro_IF	0.0610835	333.AnisoPuro	IF
333.AnisoPuro_IF	0.0493614	333.AnisoPuro	IF
333.AnisoPuro_IF	0.047785	333.AnisoPuro	IF
333.AnisoPuro_IF	0.0780813	333.AnisoPuro	IF
333.AnisoPuro_IF	0.0780513	333.AnisoPuro	IF
333.AnisoPuro_IF	0.0648103	333.AnisoPuro	IF
333.AnisoPuro_IF	0.101619	333.AnisoPuro	IF
333.AnisoPuro_IF	0.0863873	333.AnisoPuro	IF
333.AnisoPuro_IF	0.0771183	333.AnisoPuro	IF
333.AnisoPuro_IF	0.077688	333.AnisoPuro	IF
333.AnisoPuro_IF	0.0695258	333.AnisoPuro	IF
333.AnisoPuro_IF	0.0646965	333.AnisoPuro	IF
333.AnisoPuro_IF	0.0811816	333.AnisoPuro	IF
333.AnisoPuro_IF	0.0575349	333.AnisoPuro	IF
333.AnisoPuro_IF	0.0767582	333.AnisoPuro	IF
333.AnisoPuro_IF	0.0618295	333.AnisoPuro	IF
333.AnisoPuro_IF	0.0961734	333.AnisoPuro	IF
333.AnisoPuro_IF	0.13397	333.AnisoPuro	IF
333.AnisoPuro_IF	0.0826198	333.AnisoPuro	IF
333.AnisoPuro_IF	0.105933	333.AnisoPuro	IF
333.AnisoPuro_IF	0.111489	333.AnisoPuro	IF
333.AnisoPuro_IF	0.0539743	333.AnisoPuro	IF
333.AnisoPuro_IF	0.117031	333.AnisoPuro	IF
333.AnisoPuro_IF	0.122839	333.AnisoPuro	IF
333.AnisoPuro_IF	0.0657058	333.AnisoPuro	IF
333.AnisoPuro_IF	0.117203	333.AnisoPuro	IF
333.AnisoPuro_IF	0.104288	333.AnisoPuro	IF
333.AnisoPuro_IF		333.AnisoPuro	IF
333.AnisoPuro_IF		333.AnisoPuro	IF
333.AnisoPuro_IF		333.AnisoPuro	IF
333.AnisoPuro_IF		333.AnisoPuro	IF
333.AnisoPuro_IF		333.AnisoPuro	IF
333.AnisoPuro_IF		333.AnisoPuro	IF
333.AnisoPuro_IF		333.AnisoPuro	IF
333.AnisoPuro_IF		333.AnisoPuro	IF
333.AnisoPuro_PLA		333.AnisoPuro	PLA
333.AnisoPuro_PLA		333.AnisoPuro	PLA
333.AnisoPuro_PLA		333.AnisoPuro	PLA
333.AnisoPuro_PLA		333.AnisoPuro	PLA
333.AnisoPuro_PLA		333.AnisoPuro	PLA
333.AnisoPuro_PLA		333.AnisoPuro	PLA
333.AnisoPuro_PLA		333.AnisoPuro	PLA
333.AnisoPuro_PLA		333.AnisoPuro	PLA
333.AnisoPuro_PLA		333.AnisoPuro	PLA
333.AnisoPuro_PLA		333.AnisoPuro	PLA
333.AnisoPuro_PLA		333.AnisoPuro	PLA
333.AnisoPuro_PLA		333.AnisoPuro	PLA
333.AnisoPuro_PLA		333.AnisoPuro	PLA
333.AnisoPuro_PLA		333.AnisoPuro	PLA
333.AnisoPuro_PLA		333.AnisoPuro	PLA
333.AnisoPuro_PLA		333.AnisoPuro	PLA
333.AnisoPuro_PLA		333.AnisoPuro	PLA
333.AnisoPuro_PLA		333.AnisoPuro	PLA
333.AnisoPuro_PLA		333.AnisoPuro	PLA
333.AnisoPuro_PLA		333.AnisoPuro	PLA
333.AnisoPuro_PLA		333.AnisoPuro	PLA
333.AnisoPuro_PLA		333.AnisoPuro	PLA
333.AnisoPuro_PLA		333.AnisoPuro	PLA
333.AnisoPuro_PLA		333.AnisoPuro	PLA
333.AnisoPuro_PLA		333.AnisoPuro	PLA
333.AnisoPuro_PLA		333.AnisoPuro	PLA
333.AnisoPuro_PLA		333.AnisoPuro	PLA
333.AnisoPuro_PLA		333.AnisoPuro	PLA
333.AnisoPuro_PLA		333.AnisoPuro	PLA
333.AnisoPuro_PLA		333.AnisoPuro	PLA
333.AnisoPuro_PLA		333.AnisoPuro	PLA
333.AnisoPuro_PLA		333.AnisoPuro	PLA
333.AnisoPuro_PLA	0.0292354	333.AnisoPuro	PLA
333.AnisoPuro_PLA	0.0614305	333.AnisoPuro	PLA
333.AnisoPuro_PLA	0.0143689	333.AnisoPuro	PLA
333.AnisoPuro_PLA	0.0162587	333.AnisoPuro	PLA
333.AnisoPuro_PLA	0.017286	333.AnisoPuro	PLA
333.AnisoPuro_PLA	0.0113202	333.AnisoPuro	PLA
333.AnisoPuro_PLA	0.0723275	333.AnisoPuro	PLA
333.AnisoPuro_PLA	0.0375649	333.AnisoPuro	PLA
333.AnisoPuro_PLA	0.00992124	333.AnisoPuro	PLA
333.AnisoPuro_PLA	-0.00055486	333.AnisoPuro	PLA
333.AnisoPuro_PLA	0.00470527	333.AnisoPuro	PLA
333.AnisoPuro_PLA	0.0356317	333.AnisoPuro	PLA
333.AnisoPuro_PLA	0.00981012	333.AnisoPuro	PLA
333.AnisoPuro_PLA	0.0449789	333.AnisoPuro	PLA
333.AnisoPuro_PLA	0.0438832	333.AnisoPuro	PLA
333.AnisoPuro_PLA	0.00328795	333.AnisoPuro	PLA
333.AnisoPuro_PLA	0.0208161	333.AnisoPuro	PLA
333.AnisoPuro_PLA	0.0200787	333.AnisoPuro	PLA
333.AnisoPuro_PLA	0.00979393	333.AnisoPuro	PLA
333.AnisoPuro_PLA	0.0177724	333.AnisoPuro	PLA
333.AnisoPuro_PLA	0.0126242	333.AnisoPuro	PLA
333.AnisoPuro_PLA	0.00439104	333.AnisoPuro	PLA
333.AnisoPuro_PLA	0.0151306	333.AnisoPuro	PLA
333.AnisoPuro_PLA	0.0150563	333.AnisoPuro	PLA
333.AnisoPuro_PLA	0.022109	333.AnisoPuro	PLA
333.AnisoPuro_PLA	0.0233946	333.AnisoPuro	PLA
333.AnisoPuro_PLA	0.0199153	333.AnisoPuro	PLA
333.AnisoPuro_PLA	0.0269291	333.AnisoPuro	PLA
333.AnisoPuro_PLA	0.0115623	333.AnisoPuro	PLA
333.AnisoPuro_PLA	0.0196975	333.AnisoPuro	PLA
333.AnisoPuro_PLA	0.0158326	333.AnisoPuro	PLA
333.AnisoPuro_PLA	0.00398925	333.AnisoPuro	PLA
333.AnisoPuro_PLA		333.AnisoPuro	PLA
333.AnisoPuro_PLA		333.AnisoPuro	PLA
333.AnisoPuro_PLA		333.AnisoPuro	PLA
333.AnisoPuro_PLA		333.AnisoPuro	PLA
333.AnisoPuro_PLA		333.AnisoPuro	PLA
333.AnisoPuro_PLA		333.AnisoPuro	PLA
333.AnisoPuro_PLA		333.AnisoPuro	PLA
333.AnisoPuro_PLA		333.AnisoPuro	PLA
333.AnisoPuro_PLA	0.00462486	333.AnisoPuro	PLA
333.AnisoPuro_PLA	0.0252957	333.AnisoPuro	PLA
333.AnisoPuro_PLA	0.0125091	333.AnisoPuro	PLA
333.AnisoPuro_PLA	0.0176263	333.AnisoPuro	PLA
333.AnisoPuro_PLA	0.0142948	333.AnisoPuro	PLA
333.AnisoPuro_PLA	0.0136962	333.AnisoPuro	PLA
333.AnisoPuro_PLA	0.0189623	333.AnisoPuro	PLA
333.AnisoPuro_PLA	0.0354283	333.AnisoPuro	PLA
333.AnisoPuro_PLA	0.0372379	333.AnisoPuro	PLA
333.AnisoPuro_PLA	0.0186306	333.AnisoPuro	PLA
333.AnisoPuro_PLA	0.0361417	333.AnisoPuro	PLA
333.AnisoPuro_PLA	0.0202924	333.AnisoPuro	PLA
333.AnisoPuro_PLA	0.0227316	333.AnisoPuro	PLA
333.AnisoPuro_PLA	0.0271623	333.AnisoPuro	PLA
333.AnisoPuro_PLA	0.0287641	333.AnisoPuro	PLA
333.AnisoPuro_PLA	0.0236669	333.AnisoPuro	PLA
333.AnisoPuro_PLA	0.113628	333.AnisoPuro	PLA
333.AnisoPuro_PLA	0.0848273	333.AnisoPuro	PLA
333.AnisoPuro_PLA	0.0240209	333.AnisoPuro	PLA
333.AnisoPuro_PLA	0.0338786	333.AnisoPuro	PLA
333.AnisoPuro_PLA	0.00734211	333.AnisoPuro	PLA
333.AnisoPuro_PLA	0.0315354	333.AnisoPuro	PLA
333.AnisoPuro_PLA	0.0191045	333.AnisoPuro	PLA
333.AnisoPuro_PLA	0.0127781	333.AnisoPuro	PLA
333.AnisoPuro_PLA	0.0113162	333.AnisoPuro	PLA
333.AnisoPuro_PLA	0.0247743	333.AnisoPuro	PLA
333.AnisoPuro_PLA	0.0214278	333.AnisoPuro	PLA
333.AnisoPuro_PLA	0.0486408	333.AnisoPuro	PLA
333.AnisoPuro_PLA	0.038838	333.AnisoPuro	PLA
333.AnisoPuro_PLA	0.0586625	333.AnisoPuro	PLA
333.AnisoPuro_PLA	0.0465294	333.AnisoPuro	PLA
333.AnisoPuro_PLA	0.0241368	333.AnisoPuro	PLA
333.AnisoPuro_PLA	-0.0107596	333.AnisoPuro	PLA
333.AnisoPuro_PLA	0.00725618	333.AnisoPuro	PLA
333.AnisoPuro_PLA	0.00232979	333.AnisoPuro	PLA
333.AnisoPuro_PLA	0.0155651	333.AnisoPuro	PLA
333.AnisoPuro_PLA	0.0121716	333.AnisoPuro	PLA
333.AnisoPuro_PLA	0.017029	333.AnisoPuro	PLA
333.AnisoPuro_PLA	0.0267159	333.AnisoPuro	PLA
333.AnisoPuro_PLA	0.0219934	333.AnisoPuro	PLA
333.AnisoPuro_PLA	-0.0104448	333.AnisoPuro	PLA
333.AnisoPuro_PLA	-0.00621794	333.AnisoPuro	PLA
333.AnisoPuro_PLA	0.0113162	333.AnisoPuro	PLA
333.AnisoPuro_PLA	0.0046291	333.AnisoPuro	PLA
333.AnisoPuro_PLA	0.0859694	333.AnisoPuro	PLA
333.AnisoPuro_PLA	0.0267009	333.AnisoPuro	PLA
333.AnisoPuro_PLA	0.0467552	333.AnisoPuro	PLA
333.AnisoPuro_PLA	0.0371732	333.AnisoPuro	PLA
333.AnisoPuro_PLA		333.AnisoPuro	PLA
333.AnisoPuro_PLA		333.AnisoPuro	PLA
333.AnisoPuro_PLA		333.AnisoPuro	PLA
333.AnisoPuro_PLA		333.AnisoPuro	PLA
333.AnisoPuro_PLA		333.AnisoPuro	PLA
333.AnisoPuro_PLA		333.AnisoPuro	PLA
333.AnisoPuro_PLA		333.AnisoPuro	PLA
333.AnisoPuro_PLA		333.AnisoPuro	PLA
333.AnisoPuro_PLA		333.AnisoPuro	PLA
333.AnisoPuro_PLA		333.AnisoPuro	PLA
333.AnisoPuro_PLA		333.AnisoPuro	PLA
333.AnisoPuro_PLA		333.AnisoPuro	PLA
333.AnisoPuro_PLA	0.182168	333.AnisoPuro	PLA
333.AnisoPuro_PLA	0.158242	333.AnisoPuro	PLA
333.AnisoPuro_PLA	0.280884	333.AnisoPuro	PLA
333.AnisoPuro_PLA	0.227589	333.AnisoPuro	PLA
333.AnisoPuro_PLA	0.110561	333.AnisoPuro	PLA
333.AnisoPuro_PLA	0.182951	333.AnisoPuro	PLA
333.AnisoPuro_PLA	0.176616	333.AnisoPuro	PLA
333.AnisoPuro_PLA	0.188122	333.AnisoPuro	PLA
333.AnisoPuro_PLA	0.104814	333.AnisoPuro	PLA
333.AnisoPuro_PLA	0.135988	333.AnisoPuro	PLA
333.AnisoPuro_PLA	0.075221	333.AnisoPuro	PLA
333.AnisoPuro_PLA	0.0753859	333.AnisoPuro	PLA
333.AnisoPuro_PLA	0.125597	333.AnisoPuro	PLA
333.AnisoPuro_PLA	0.0814235	333.AnisoPuro	PLA
333.AnisoPuro_PLA	0.145386	333.AnisoPuro	PLA
333.AnisoPuro_PLA	0.110434	333.AnisoPuro	PLA
333.AnisoPuro_PLA	0.0861091	333.AnisoPuro	PLA
333.AnisoPuro_PLA	0.148571	333.AnisoPuro	PLA
333.AnisoPuro_PLA	0.132963	333.AnisoPuro	PLA
333.AnisoPuro_PLA	0.0880563	333.AnisoPuro	PLA
333.AnisoPuro_PLA	0.116387	333.AnisoPuro	PLA
333.AnisoPuro_PLA	0.0799916	333.AnisoPuro	PLA
333.AnisoPuro_PLA	0.0949253	333.AnisoPuro	PLA
333.AnisoPuro_PLA	0.0981817	333.AnisoPuro	PLA
333.AnisoPuro_PLA	0.123238	333.AnisoPuro	PLA
333.AnisoPuro_PLA	0.104853	333.AnisoPuro	PLA
333.AnisoPuro_PLA	0.238046	333.AnisoPuro	PLA
333.AnisoPuro_PLA	0.146244	333.AnisoPuro	PLA
333.AnisoPuro_PLA	0.140865	333.AnisoPuro	PLA
333.AnisoPuro_PLA	0.135109	333.AnisoPuro	PLA
333.AnisoPuro_PLA	0.085702	333.AnisoPuro	PLA
333.AnisoPuro_PLA	0.0978656	333.AnisoPuro	PLA
333.AnisoPuro_PLA		333.AnisoPuro	PLA
333.AnisoPuro_PLA		333.AnisoPuro	PLA
333.AnisoPuro_PLA		333.AnisoPuro	PLA
333.AnisoPuro_PLA		333.AnisoPuro	PLA
333.AnisoPuro_PLA		333.AnisoPuro	PLA
333.AnisoPuro_PLA		333.AnisoPuro	PLA
333.AnisoPuro_PLA		333.AnisoPuro	PLA
333.AnisoPuro_PLA		333.AnisoPuro	PLA
U87.EmtPuro_IF		U87.EmtPuro	IF
U87.EmtPuro_IF		U87.EmtPuro	IF
U87.EmtPuro_IF		U87.EmtPuro	IF
U87.EmtPuro_IF		U87.EmtPuro	IF
U87.EmtPuro_IF		U87.EmtPuro	IF
U87.EmtPuro_IF		U87.EmtPuro	IF
U87.EmtPuro_IF		U87.EmtPuro	IF
U87.EmtPuro_IF		U87.EmtPuro	IF
U87.EmtPuro_IF		U87.EmtPuro	IF
U87.EmtPuro_IF		U87.EmtPuro	IF
U87.EmtPuro_IF		U87.EmtPuro	IF
U87.EmtPuro_IF		U87.EmtPuro	IF
U87.EmtPuro_IF		U87.EmtPuro	IF
U87.EmtPuro_IF		U87.EmtPuro	IF
U87.EmtPuro_IF		U87.EmtPuro	IF
U87.EmtPuro_IF		U87.EmtPuro	IF
U87.EmtPuro_IF		U87.EmtPuro	IF
U87.EmtPuro_IF		U87.EmtPuro	IF
U87.EmtPuro_IF		U87.EmtPuro	IF
U87.EmtPuro_IF		U87.EmtPuro	IF
U87.EmtPuro_IF		U87.EmtPuro	IF
U87.EmtPuro_IF		U87.EmtPuro	IF
U87.EmtPuro_IF		U87.EmtPuro	IF
U87.EmtPuro_IF		U87.EmtPuro	IF
U87.EmtPuro_IF		U87.EmtPuro	IF
U87.EmtPuro_IF		U87.EmtPuro	IF
U87.EmtPuro_IF		U87.EmtPuro	IF
U87.EmtPuro_IF		U87.EmtPuro	IF
U87.EmtPuro_IF		U87.EmtPuro	IF
U87.EmtPuro_IF		U87.EmtPuro	IF
U87.EmtPuro_IF		U87.EmtPuro	IF
U87.EmtPuro_IF		U87.EmtPuro	IF
U87.EmtPuro_IF		U87.EmtPuro	IF
U87.EmtPuro_IF		U87.EmtPuro	IF
U87.EmtPuro_IF		U87.EmtPuro	IF
U87.EmtPuro_IF		U87.EmtPuro	IF
U87.EmtPuro_IF		U87.EmtPuro	IF
U87.EmtPuro_IF		U87.EmtPuro	IF
U87.EmtPuro_IF		U87.EmtPuro	IF
U87.EmtPuro_IF		U87.EmtPuro	IF
U87.EmtPuro_IF		U87.EmtPuro	IF
U87.EmtPuro_IF		U87.EmtPuro	IF
U87.EmtPuro_IF		U87.EmtPuro	IF
U87.EmtPuro_IF		U87.EmtPuro	IF
U87.EmtPuro_IF		U87.EmtPuro	IF
U87.EmtPuro_IF		U87.EmtPuro	IF
U87.EmtPuro_IF		U87.EmtPuro	IF
U87.EmtPuro_IF		U87.EmtPuro	IF
U87.EmtPuro_IF		U87.EmtPuro	IF
U87.EmtPuro_IF		U87.EmtPuro	IF
U87.EmtPuro_IF		U87.EmtPuro	IF
U87.EmtPuro_IF		U87.EmtPuro	IF
U87.EmtPuro_IF		U87.EmtPuro	IF
U87.EmtPuro_IF		U87.EmtPuro	IF
U87.EmtPuro_IF		U87.EmtPuro	IF
U87.EmtPuro_IF		U87.EmtPuro	IF
U87.EmtPuro_IF		U87.EmtPuro	IF
U87.EmtPuro_IF		U87.EmtPuro	IF
U87.EmtPuro_IF		U87.EmtPuro	IF
U87.EmtPuro_IF		U87.EmtPuro	IF
U87.EmtPuro_IF		U87.EmtPuro	IF
U87.EmtPuro_IF		U87.EmtPuro	IF
U87.EmtPuro_IF		U87.EmtPuro	IF
U87.EmtPuro_IF		U87.EmtPuro	IF
U87.EmtPuro_IF		U87.EmtPuro	IF
U87.EmtPuro_IF		U87.EmtPuro	IF
U87.EmtPuro_IF		U87.EmtPuro	IF
U87.EmtPuro_IF		U87.EmtPuro	IF
U87.EmtPuro_IF		U87.EmtPuro	IF
U87.EmtPuro_IF		U87.EmtPuro	IF
U87.EmtPuro_IF		U87.EmtPuro	IF
U87.EmtPuro_IF		U87.EmtPuro	IF
U87.EmtPuro_IF	0.99615	U87.EmtPuro	IF
U87.EmtPuro_IF	0.464676	U87.EmtPuro	IF
U87.EmtPuro_IF	1.30567	U87.EmtPuro	IF
U87.EmtPuro_IF	0.59932	U87.EmtPuro	IF
U87.EmtPuro_IF	0.897188	U87.EmtPuro	IF
U87.EmtPuro_IF	0.689303	U87.EmtPuro	IF
U87.EmtPuro_IF	1.12875	U87.EmtPuro	IF
U87.EmtPuro_IF	1.2641	U87.EmtPuro	IF
U87.EmtPuro_IF	0.837913	U87.EmtPuro	IF
U87.EmtPuro_IF	0.627672	U87.EmtPuro	IF
U87.EmtPuro_IF	1.08045	U87.EmtPuro	IF
U87.EmtPuro_IF	0.714349	U87.EmtPuro	IF
U87.EmtPuro_IF	1.79385	U87.EmtPuro	IF
U87.EmtPuro_IF	0.778018	U87.EmtPuro	IF
U87.EmtPuro_IF	0.938934	U87.EmtPuro	IF
U87.EmtPuro_IF	1.03286	U87.EmtPuro	IF
U87.EmtPuro_IF	0.764889	U87.EmtPuro	IF
U87.EmtPuro_IF	0.813632	U87.EmtPuro	IF
U87.EmtPuro_IF	1.36874	U87.EmtPuro	IF
U87.EmtPuro_IF	0.955196	U87.EmtPuro	IF
U87.EmtPuro_IF	0.67322	U87.EmtPuro	IF
U87.EmtPuro_IF	0.847803	U87.EmtPuro	IF
U87.EmtPuro_IF	0.635236	U87.EmtPuro	IF
U87.EmtPuro_IF	0.581175	U87.EmtPuro	IF
U87.EmtPuro_IF	0.545662	U87.EmtPuro	IF
U87.EmtPuro_IF	0.449051	U87.EmtPuro	IF
U87.EmtPuro_IF	0.654915	U87.EmtPuro	IF
U87.EmtPuro_IF	0.624893	U87.EmtPuro	IF
U87.EmtPuro_IF	0.653456	U87.EmtPuro	IF
U87.EmtPuro_IF	0.53871	U87.EmtPuro	IF
U87.EmtPuro_IF	0.742538	U87.EmtPuro	IF
U87.EmtPuro_IF	0.881555	U87.EmtPuro	IF
U87.EmtPuro_IF	0.639561	U87.EmtPuro	IF
U87.EmtPuro_IF	1.01745	U87.EmtPuro	IF
U87.EmtPuro_IF	0.59824	U87.EmtPuro	IF
U87.EmtPuro_IF	0.395925	U87.EmtPuro	IF
U87.EmtPuro_IF	0.880754	U87.EmtPuro	IF
U87.EmtPuro_IF	0.529593	U87.EmtPuro	IF
U87.EmtPuro_IF	0.63415	U87.EmtPuro	IF
U87.EmtPuro_IF	1.18314	U87.EmtPuro	IF
U87.EmtPuro_IF	0.761541	U87.EmtPuro	IF
U87.EmtPuro_IF	0.593403	U87.EmtPuro	IF
U87.EmtPuro_IF	0.913536	U87.EmtPuro	IF
U87.EmtPuro_IF	0.562893	U87.EmtPuro	IF
U87.EmtPuro_IF	0.608929	U87.EmtPuro	IF
U87.EmtPuro_IF	1.13628	U87.EmtPuro	IF
U87.EmtPuro_IF	1.74797	U87.EmtPuro	IF
U87.EmtPuro_IF	1.11901	U87.EmtPuro	IF
U87.EmtPuro_IF	0.84315	U87.EmtPuro	IF
U87.EmtPuro_IF	0.772564	U87.EmtPuro	IF
U87.EmtPuro_IF	1.23476	U87.EmtPuro	IF
U87.EmtPuro_IF	1.4541	U87.EmtPuro	IF
U87.EmtPuro_IF	1.25936	U87.EmtPuro	IF
U87.EmtPuro_IF	1.49894	U87.EmtPuro	IF
U87.EmtPuro_IF	1.31048	U87.EmtPuro	IF
U87.EmtPuro_IF	0.855958	U87.EmtPuro	IF
U87.EmtPuro_IF	0.837215	U87.EmtPuro	IF
U87.EmtPuro_IF	0.842218	U87.EmtPuro	IF
U87.EmtPuro_IF	1.54674	U87.EmtPuro	IF
U87.EmtPuro_IF	0.984714	U87.EmtPuro	IF
U87.EmtPuro_IF		U87.EmtPuro	IF
U87.EmtPuro_IF		U87.EmtPuro	IF
U87.EmtPuro_IF		U87.EmtPuro	IF
U87.EmtPuro_IF		U87.EmtPuro	IF
U87.EmtPuro_IF		U87.EmtPuro	IF
U87.EmtPuro_IF		U87.EmtPuro	IF
U87.EmtPuro_IF		U87.EmtPuro	IF
U87.EmtPuro_IF		U87.EmtPuro	IF
U87.EmtPuro_IF		U87.EmtPuro	IF
U87.EmtPuro_IF		U87.EmtPuro	IF
U87.EmtPuro_IF		U87.EmtPuro	IF
U87.EmtPuro_IF		U87.EmtPuro	IF
U87.EmtPuro_IF		U87.EmtPuro	IF
U87.EmtPuro_IF		U87.EmtPuro	IF
U87.EmtPuro_IF		U87.EmtPuro	IF
U87.EmtPuro_IF		U87.EmtPuro	IF
U87.EmtPuro_IF		U87.EmtPuro	IF
U87.EmtPuro_IF		U87.EmtPuro	IF
U87.EmtPuro_IF		U87.EmtPuro	IF
U87.EmtPuro_IF		U87.EmtPuro	IF
U87.EmtPuro_IF		U87.EmtPuro	IF
U87.EmtPuro_IF		U87.EmtPuro	IF
U87.EmtPuro_IF		U87.EmtPuro	IF
U87.EmtPuro_IF		U87.EmtPuro	IF
U87.EmtPuro_IF		U87.EmtPuro	IF
U87.EmtPuro_IF		U87.EmtPuro	IF
U87.EmtPuro_IF		U87.EmtPuro	IF
U87.EmtPuro_IF		U87.EmtPuro	IF
U87.EmtPuro_IF		U87.EmtPuro	IF
U87.EmtPuro_IF		U87.EmtPuro	IF
U87.EmtPuro_IF		U87.EmtPuro	IF
U87.EmtPuro_IF		U87.EmtPuro	IF
U87.EmtPuro_IF		U87.EmtPuro	IF
U87.EmtPuro_IF		U87.EmtPuro	IF
U87.EmtPuro_IF		U87.EmtPuro	IF
U87.EmtPuro_IF		U87.EmtPuro	IF
U87.EmtPuro_IF		U87.EmtPuro	IF
U87.EmtPuro_IF		U87.EmtPuro	IF
U87.EmtPuro_IF		U87.EmtPuro	IF
U87.EmtPuro_IF		U87.EmtPuro	IF
U87.EmtPuro_PLA	0.167132	U87.EmtPuro	PLA
U87.EmtPuro_PLA	0.162471	U87.EmtPuro	PLA
U87.EmtPuro_PLA	0.16754	U87.EmtPuro	PLA
U87.EmtPuro_PLA	0.188358	U87.EmtPuro	PLA
U87.EmtPuro_PLA	0.169484	U87.EmtPuro	PLA
U87.EmtPuro_PLA	0.146289	U87.EmtPuro	PLA
U87.EmtPuro_PLA	0.21274	U87.EmtPuro	PLA
U87.EmtPuro_PLA	0.195725	U87.EmtPuro	PLA
U87.EmtPuro_PLA	0.12125	U87.EmtPuro	PLA
U87.EmtPuro_PLA	0.104639	U87.EmtPuro	PLA
U87.EmtPuro_PLA	0.0381386	U87.EmtPuro	PLA
U87.EmtPuro_PLA	0.221434	U87.EmtPuro	PLA
U87.EmtPuro_PLA	0.180726	U87.EmtPuro	PLA
U87.EmtPuro_PLA	0.183549	U87.EmtPuro	PLA
U87.EmtPuro_PLA	0.202903	U87.EmtPuro	PLA
U87.EmtPuro_PLA	0.113679	U87.EmtPuro	PLA
U87.EmtPuro_PLA	0.279367	U87.EmtPuro	PLA
U87.EmtPuro_PLA	0.155751	U87.EmtPuro	PLA
U87.EmtPuro_PLA	0.0717958	U87.EmtPuro	PLA
U87.EmtPuro_PLA	0.167466	U87.EmtPuro	PLA
U87.EmtPuro_PLA	0.100644	U87.EmtPuro	PLA
U87.EmtPuro_PLA	0.180153	U87.EmtPuro	PLA
U87.EmtPuro_PLA	0.220694	U87.EmtPuro	PLA
U87.EmtPuro_PLA	0.186765	U87.EmtPuro	PLA
U87.EmtPuro_PLA	0.316976	U87.EmtPuro	PLA
U87.EmtPuro_PLA	0.172206	U87.EmtPuro	PLA
U87.EmtPuro_PLA	0.10394	U87.EmtPuro	PLA
U87.EmtPuro_PLA	0.248045	U87.EmtPuro	PLA
U87.EmtPuro_PLA	0.0840679	U87.EmtPuro	PLA
U87.EmtPuro_PLA	0.218093	U87.EmtPuro	PLA
U87.EmtPuro_PLA	0.246896	U87.EmtPuro	PLA
U87.EmtPuro_PLA	0.204353	U87.EmtPuro	PLA
U87.EmtPuro_PLA	0.327384	U87.EmtPuro	PLA
U87.EmtPuro_PLA	0.647459	U87.EmtPuro	PLA
U87.EmtPuro_PLA	0.229835	U87.EmtPuro	PLA
U87.EmtPuro_PLA	0.397407	U87.EmtPuro	PLA
U87.EmtPuro_PLA	0.490871	U87.EmtPuro	PLA
U87.EmtPuro_PLA	1.01725	U87.EmtPuro	PLA
U87.EmtPuro_PLA	0.538308	U87.EmtPuro	PLA
U87.EmtPuro_PLA	0.160379	U87.EmtPuro	PLA
U87.EmtPuro_PLA	0.39175	U87.EmtPuro	PLA
U87.EmtPuro_PLA	0.275219	U87.EmtPuro	PLA
U87.EmtPuro_PLA	0.0864799	U87.EmtPuro	PLA
U87.EmtPuro_PLA	0.223705	U87.EmtPuro	PLA
U87.EmtPuro_PLA	0.243551	U87.EmtPuro	PLA
U87.EmtPuro_PLA	0.357599	U87.EmtPuro	PLA
U87.EmtPuro_PLA	0.358092	U87.EmtPuro	PLA
U87.EmtPuro_PLA	0.444029	U87.EmtPuro	PLA
U87.EmtPuro_PLA	0.0811587	U87.EmtPuro	PLA
U87.EmtPuro_PLA	0.168687	U87.EmtPuro	PLA
U87.EmtPuro_PLA	0.114456	U87.EmtPuro	PLA
U87.EmtPuro_PLA	0.09006	U87.EmtPuro	PLA
U87.EmtPuro_PLA	0.0998414	U87.EmtPuro	PLA
U87.EmtPuro_PLA	0.115105	U87.EmtPuro	PLA
U87.EmtPuro_PLA	0.0988568	U87.EmtPuro	PLA
U87.EmtPuro_PLA	0.227871	U87.EmtPuro	PLA
U87.EmtPuro_PLA	0.217148	U87.EmtPuro	PLA
U87.EmtPuro_PLA	0.222721	U87.EmtPuro	PLA
U87.EmtPuro_PLA	0.25225	U87.EmtPuro	PLA
U87.EmtPuro_PLA	0.142402	U87.EmtPuro	PLA
U87.EmtPuro_PLA	0.287619	U87.EmtPuro	PLA
U87.EmtPuro_PLA	0.272104	U87.EmtPuro	PLA
U87.EmtPuro_PLA	0.14755	U87.EmtPuro	PLA
U87.EmtPuro_PLA	0.130565	U87.EmtPuro	PLA
U87.EmtPuro_PLA		U87.EmtPuro	PLA
U87.EmtPuro_PLA		U87.EmtPuro	PLA
U87.EmtPuro_PLA		U87.EmtPuro	PLA
U87.EmtPuro_PLA		U87.EmtPuro	PLA
U87.EmtPuro_PLA		U87.EmtPuro	PLA
U87.EmtPuro_PLA		U87.EmtPuro	PLA
U87.EmtPuro_PLA		U87.EmtPuro	PLA
U87.EmtPuro_PLA		U87.EmtPuro	PLA
U87.EmtPuro_PLA	0.0190743	U87.EmtPuro	PLA
U87.EmtPuro_PLA	0.0511417	U87.EmtPuro	PLA
U87.EmtPuro_PLA	0.0447934	U87.EmtPuro	PLA
U87.EmtPuro_PLA	0.0419475	U87.EmtPuro	PLA
U87.EmtPuro_PLA	0.0326443	U87.EmtPuro	PLA
U87.EmtPuro_PLA	0.0559992	U87.EmtPuro	PLA
U87.EmtPuro_PLA	0.121488	U87.EmtPuro	PLA
U87.EmtPuro_PLA	0.0615151	U87.EmtPuro	PLA
U87.EmtPuro_PLA	0.0763832	U87.EmtPuro	PLA
U87.EmtPuro_PLA	0.0814215	U87.EmtPuro	PLA
U87.EmtPuro_PLA	0.0706674	U87.EmtPuro	PLA
U87.EmtPuro_PLA	0.0975926	U87.EmtPuro	PLA
U87.EmtPuro_PLA	0.0596884	U87.EmtPuro	PLA
U87.EmtPuro_PLA	0.0653753	U87.EmtPuro	PLA
U87.EmtPuro_PLA	0.0743767	U87.EmtPuro	PLA
U87.EmtPuro_PLA	0.0844793	U87.EmtPuro	PLA
U87.EmtPuro_PLA	0.0393918	U87.EmtPuro	PLA
U87.EmtPuro_PLA	0.0445181	U87.EmtPuro	PLA
U87.EmtPuro_PLA	0.0700064	U87.EmtPuro	PLA
U87.EmtPuro_PLA	0.0372254	U87.EmtPuro	PLA
U87.EmtPuro_PLA	0.0734578	U87.EmtPuro	PLA
U87.EmtPuro_PLA	0.0815929	U87.EmtPuro	PLA
U87.EmtPuro_PLA	0.113187	U87.EmtPuro	PLA
U87.EmtPuro_PLA	0.0738635	U87.EmtPuro	PLA
U87.EmtPuro_PLA	0.107841	U87.EmtPuro	PLA
U87.EmtPuro_PLA	0.122823	U87.EmtPuro	PLA
U87.EmtPuro_PLA	0.0924099	U87.EmtPuro	PLA
U87.EmtPuro_PLA	0.10734	U87.EmtPuro	PLA
U87.EmtPuro_PLA	0.121098	U87.EmtPuro	PLA
U87.EmtPuro_PLA	0.0799691	U87.EmtPuro	PLA
U87.EmtPuro_PLA	0.0665469	U87.EmtPuro	PLA
U87.EmtPuro_PLA	0.0998695	U87.EmtPuro	PLA
U87.EmtPuro_PLA	0.0778521	U87.EmtPuro	PLA
U87.EmtPuro_PLA	0.0735723	U87.EmtPuro	PLA
U87.EmtPuro_PLA	0.0931369	U87.EmtPuro	PLA
[truncated: 65 more rows]
