# Supplementary material for: Elongation inhibitors do not prevent the release of puromycylated nascent polypeptide chains from ribosomes
Source: eLife journal article supplement (doi:10.7554/elife.60048), 2020-08-26
Supplement: supp [file elife-60048-supp-v1.zip › elife_poa_e60048_Figure_1_source_data_3.xlsx]

## Sheet: Figure 1 - figure supplement 1B
groups	PunctaPerCell
Untreated	13
Untreated	11
Untreated	5
Untreated	11.5
Untreated	17
Untreated	13
Untreated	7.5
Untreated	4
Untreated	3
Untreated	12
Untreated	6
Untreated	5.5
Untreated	8
Untreated	9
Untreated	8
Untreated	4
Untreated	9
Untreated	3.5
Untreated	4
Untreated	7.5
Untreated	7.5
Untreated	4.33333
Untreated
Untreated
Puro	241.783
Puro	195.405
Puro	216.876
Puro	156.904
Puro	264.798
Puro	186.695
Puro	105.571
Puro	166.254
Puro	116.082
Puro	187.294
Puro	183.442
Puro	209.632
Puro	178.661
Puro	184.894
Puro	198.119
Puro	224.401
Puro	207.445
Puro	264.489
Puro	307.886
Puro	308.495
Puro	226.956
Puro	163.525
Puro	160.911
Puro	127.783
EmtPuro	226.956
EmtPuro	163.525
EmtPuro	160.911
EmtPuro	127.783
EmtPuro	116.665
EmtPuro	87.2233
EmtPuro	245.33
EmtPuro	299.518
EmtPuro	268.265
EmtPuro	160.93
EmtPuro	245.329
EmtPuro	215.25
EmtPuro	230.666
EmtPuro	306.763
EmtPuro	278.886
EmtPuro	195.573
EmtPuro	201.012
EmtPuro	233.525
EmtPuro	215.887
EmtPuro	191.398
EmtPuro	206.844
EmtPuro	144.593
EmtPuro	103.074
EmtPuro
NoPuroAb	4
NoPuroAb	8
NoPuroAb	2
NoPuroAb	3
NoPuroAb	4
NoPuroAb	2
NoPuroAb	4
NoPuroAb	3.5
NoPuroAb	1
NoPuroAb	1.5
NoPuroAb	3
NoPuroAb	5
NoPuroAb	6
NoPuroAb	6
NoPuroAb	5
NoPuroAb	9
NoPuroAb	3
NoPuroAb	10
NoPuroAb	8
NoPuroAb	5
NoPuroAb
NoPuroAb
NoPuroAb
NoPuroAb
NoHaAb	4.5
NoHaAb	5
NoHaAb	15
NoHaAb	9
NoHaAb	3.66667
NoHaAb	16.5
NoHaAb	6
NoHaAb	13
NoHaAb	13.3333
NoHaAb	2.75
NoHaAb	3
NoHaAb	4
NoHaAb	6
NoHaAb	4
NoHaAb	7
NoHaAb	9
NoHaAb	4
NoHaAb	7
NoHaAb	5
NoHaAb	5
NoHaAb
NoHaAb
NoHaAb
NoHaAb
