# Supplementary material for: Elongation inhibitors do not prevent the release of puromycylated nascent polypeptide chains from ribosomes
Source: eLife journal article supplement (doi:10.7554/elife.60048), 2020-08-26
Supplement: supp [file elife-60048-supp-v1.zip › elife_poa_e60048_Figure_1_source_data_4.xlsx]

## Sheet: Figure 1 - figure supplement 2C
groups	Normalized Fluorescence Intensity	Cells.Condition	Fluor
PuroWash15_IF	0.908824	PuroWash15	IF
PuroWash15_IF	0.453715	PuroWash15	IF
PuroWash15_IF	0.620846	PuroWash15	IF
PuroWash15_IF	1.08531	PuroWash15	IF
PuroWash15_IF	2.71504	PuroWash15	IF
PuroWash15_IF	2.17237	PuroWash15	IF
PuroWash15_IF	1.37554	PuroWash15	IF
PuroWash15_IF	1.83295	PuroWash15	IF
PuroWash15_IF	1.20776	PuroWash15	IF
PuroWash15_IF	0.942633	PuroWash15	IF
PuroWash15_IF	1.9112	PuroWash15	IF
PuroWash15_IF	0.870684	PuroWash15	IF
PuroWash15_IF	1.10749	PuroWash15	IF
PuroWash15_IF	0.942345	PuroWash15	IF
PuroWash15_IF	0.710442	PuroWash15	IF
PuroWash15_IF	0.637613	PuroWash15	IF
PuroWash15_IF	1.13729	PuroWash15	IF
PuroWash15_IF	1.35304	PuroWash15	IF
PuroWash15_IF	1.49075	PuroWash15	IF
PuroWash15_IF	1.25092	PuroWash15	IF
PuroWash15_IF	0.490741	PuroWash15	IF
PuroWash15_IF	0.903291	PuroWash15	IF
PuroWash15_IF	0.702814	PuroWash15	IF
PuroWash15_IF	1.15857	PuroWash15	IF
PuroWash15_IF	1.05516	PuroWash15	IF
PuroWash15_IF	0.43177	PuroWash15	IF
PuroWash15_IF	0.216979	PuroWash15	IF
PuroWash15_IF	0.663163	PuroWash15	IF
PuroWash15_IF	0.470094	PuroWash15	IF
PuroWash15_IF	0.590457	PuroWash15	IF
PuroWash15_IF	0.597297	PuroWash15	IF
PuroWash15_IF	1.63305	PuroWash15	IF
PuroWash15_IF	0.488602	PuroWash15	IF
PuroWash15_IF	1.1573	PuroWash15	IF
PuroWash15_IF	0.613672	PuroWash15	IF
PuroWash15_IF	1.60932	PuroWash15	IF
PuroWash15_IF	0.789955	PuroWash15	IF
PuroWash15_IF	0.594464	PuroWash15	IF
PuroWash15_IF	0.62484	PuroWash15	IF
PuroWash15_IF	0.554619	PuroWash15	IF
PuroWash15_IF	0.671134	PuroWash15	IF
PuroWash15_IF	1.12849	PuroWash15	IF
PuroWash15_IF	0.926607	PuroWash15	IF
PuroWash15_IF	1.07489	PuroWash15	IF
PuroWash15_IF	2.03028	PuroWash15	IF
PuroWash15_IF	1.84556	PuroWash15	IF
PuroWash15_IF	1.38945	PuroWash15	IF
PuroWash15_IF	2.27184	PuroWash15	IF
PuroWash15_IF	0.363833	PuroWash15	IF
PuroWash15_IF	1.74614	PuroWash15	IF
PuroWash15_IF	1.00472	PuroWash15	IF
PuroWash15_IF	0.492835	PuroWash15	IF
PuroWash15_IF	1.32011	PuroWash15	IF
PuroWash15_IF	1.35939	PuroWash15	IF
PuroWash15_IF	1.07483	PuroWash15	IF
PuroWash15_IF	1.27056	PuroWash15	IF
PuroWash15_IF	1.19226	PuroWash15	IF
PuroWash15_IF	1.77812	PuroWash15	IF
PuroWash15_IF	0.829726	PuroWash15	IF
PuroWash15_IF	1.49979	PuroWash15	IF
PuroWash15_IF	1.44482	PuroWash15	IF
PuroWash15_IF	0.129645	PuroWash15	IF
PuroWash15_IF	0.752579	PuroWash15	IF
PuroWash15_IF	0.814057	PuroWash15	IF
PuroWash15_IF	0.546349	PuroWash15	IF
PuroWash15_IF	0.960542	PuroWash15	IF
PuroWash15_IF	1.00554	PuroWash15	IF
PuroWash15_IF	0.791546	PuroWash15	IF
PuroWash15_IF	0.500908	PuroWash15	IF
PuroWash15_IF	0.624134	PuroWash15	IF
PuroWash15_IF	0.40889	PuroWash15	IF
PuroWash15_IF	0.957034	PuroWash15	IF
PuroWash15_IF	1.17958	PuroWash15	IF
PuroWash15_IF	0.854658	PuroWash15	IF
PuroWash15_IF	0.700025	PuroWash15	IF
PuroWash15_IF	0.650047	PuroWash15	IF
PuroWash15_IF	1.90318	PuroWash15	IF
PuroWash15_IF	2.31018	PuroWash15	IF
PuroWash15_IF	1.27338	PuroWash15	IF
PuroWash15_IF	2.67739	PuroWash15	IF
PuroWash15_IF	0.873978	PuroWash15	IF
PuroWash15_IF	0.812509	PuroWash15	IF
PuroWash15_IF	1.26775	PuroWash15	IF
PuroWash15_IF	1.40483	PuroWash15	IF
PuroWash15_IF	0.577114	PuroWash15	IF
PuroWash15_IF	0.469453	PuroWash15	IF
PuroWash15_IF	1.04417	PuroWash15	IF
PuroWash15_IF	1.03968	PuroWash15	IF
PuroWash15_IF	0.856301	PuroWash15	IF
PuroWash15_IF	2.15412	PuroWash15	IF
PuroWash15_IF	0.988721	PuroWash15	IF
PuroWash15_IF	1.04639	PuroWash15	IF
PuroWash15_IF	1.88562	PuroWash15	IF
PuroWash15_IF	1.07247	PuroWash15	IF
PuroWash15_IF	1.0358	PuroWash15	IF
PuroWash15_IF	1.04154	PuroWash15	IF
PuroWash15_IF	0.441613	PuroWash15	IF
PuroWash15_IF	0.484285	PuroWash15	IF
PuroWash15_IF	0.97945	PuroWash15	IF
PuroWash15_IF	1.43935	PuroWash15	IF
PuroWash15_IF	0.350883	PuroWash15	IF
PuroWash15_IF	0.668579	PuroWash15	IF
PuroWash15_IF	0.766717	PuroWash15	IF
PuroWash15_IF	0.617766	PuroWash15	IF
PuroWash15_IF	0.646012	PuroWash15	IF
PuroWash15_IF	0.608264	PuroWash15	IF
PuroWash15_IF	0.494124	PuroWash15	IF
PuroWash15_IF	0.767783	PuroWash15	IF
PuroWash15_IF	0.679817	PuroWash15	IF
PuroWash15_IF	0.890206	PuroWash15	IF
PuroWash15_IF	0.272717	PuroWash15	IF
PuroWash15_IF	0.477562	PuroWash15	IF
PuroWash15_IF	0.555768	PuroWash15	IF
PuroWash15_IF	0.811241	PuroWash15	IF
PuroWash15_IF	0.705753	PuroWash15	IF
PuroWash15_IF	0.509537	PuroWash15	IF
PuroWash15_IF	0.795993	PuroWash15	IF
PuroWash15_IF	0.748291	PuroWash15	IF
PuroWash15_IF	0.526534	PuroWash15	IF
PuroWash15_IF	0.672867	PuroWash15	IF
PuroWash15_IF	0.596024	PuroWash15	IF
PuroWash15_IF	0.527917	PuroWash15	IF
PuroWash15_IF	0.57292	PuroWash15	IF
PuroWash15_IF	0.706684	PuroWash15	IF
PuroWash15_IF	0.541035	PuroWash15	IF
PuroWash15_IF	0.805087	PuroWash15	IF
PuroWash15_IF	0.550197	PuroWash15	IF
PuroWash15_IF	0.511991	PuroWash15	IF
PuroWash15_IF		PuroWash15	IF
PuroWash15_IF		PuroWash15	IF
PuroWash15_IF		PuroWash15	IF
PuroWash15_IF		PuroWash15	IF
PuroWash15_IF		PuroWash15	IF
PuroWash15_IF		PuroWash15	IF
PuroWash15_IF		PuroWash15	IF
PuroWash15_IF		PuroWash15	IF
PuroWash15_IF		PuroWash15	IF
PuroWash15_IF		PuroWash15	IF
PuroWash15_IF		PuroWash15	IF
PuroWash15_IF		PuroWash15	IF
PuroWash15_IF		PuroWash15	IF
PuroWash15_IF		PuroWash15	IF
PuroWash15_IF		PuroWash15	IF
PuroWash15_IF		PuroWash15	IF
PuroWash15_IF		PuroWash15	IF
PuroWash15_IF		PuroWash15	IF
PuroWash15_IF		PuroWash15	IF
PuroWash15_IF		PuroWash15	IF
PuroWash15_IF		PuroWash15	IF
PuroWash15_IF		PuroWash15	IF
PuroWash15_IF		PuroWash15	IF
PuroWash15_IF		PuroWash15	IF
PuroWash15_IF		PuroWash15	IF
PuroWash15_IF		PuroWash15	IF
PuroWash15_IF		PuroWash15	IF
PuroWash15_IF		PuroWash15	IF
PuroWash15_IF		PuroWash15	IF
PuroWash15_IF		PuroWash15	IF
PuroWash15_IF		PuroWash15	IF
PuroWash15_IF		PuroWash15	IF
PuroWash15_IF		PuroWash15	IF
PuroWash15_IF		PuroWash15	IF
PuroWash15_IF		PuroWash15	IF
PuroWash15_IF		PuroWash15	IF
PuroWash15_IF		PuroWash15	IF
PuroWash15_IF		PuroWash15	IF
PuroWash15_IF		PuroWash15	IF
PuroWash15_IF		PuroWash15	IF
PuroWash15_IF		PuroWash15	IF
PuroWash15_IF		PuroWash15	IF
PuroWash15_IF		PuroWash15	IF
PuroWash15_IF		PuroWash15	IF
PuroWash15_IF		PuroWash15	IF
PuroWash15_IF		PuroWash15	IF
PuroWash15_IF		PuroWash15	IF
PuroWash15_IF		PuroWash15	IF
PuroWash15_IF		PuroWash15	IF
PuroWash15_IF		PuroWash15	IF
PuroWash15_IF		PuroWash15	IF
PuroWash15_IF		PuroWash15	IF
PuroWash15_IF		PuroWash15	IF
PuroWash15_IF		PuroWash15	IF
PuroWash15_IF		PuroWash15	IF
PuroWash15_IF		PuroWash15	IF
PuroWash15_IF		PuroWash15	IF
PuroWash15_IF		PuroWash15	IF
PuroWash15_IF		PuroWash15	IF
PuroWash15_IF		PuroWash15	IF
PuroWash15_IF		PuroWash15	IF
PuroWash15_IF		PuroWash15	IF
PuroWash15_IF		PuroWash15	IF
PuroWash15_IF		PuroWash15	IF
PuroWash15_PLA	0.878669	PuroWash15	PLA
PuroWash15_PLA	0.772401	PuroWash15	PLA
PuroWash15_PLA	1.36197	PuroWash15	PLA
PuroWash15_PLA	1.03077	PuroWash15	PLA
PuroWash15_PLA	0.669978	PuroWash15	PLA
PuroWash15_PLA	1.37162	PuroWash15	PLA
PuroWash15_PLA	0.487926	PuroWash15	PLA
PuroWash15_PLA	1.02262	PuroWash15	PLA
PuroWash15_PLA	0.787071	PuroWash15	PLA
PuroWash15_PLA	0.655904	PuroWash15	PLA
PuroWash15_PLA	0.377253	PuroWash15	PLA
PuroWash15_PLA	0.862864	PuroWash15	PLA
PuroWash15_PLA	0.803798	PuroWash15	PLA
PuroWash15_PLA	1.13902	PuroWash15	PLA
PuroWash15_PLA	1.21378	PuroWash15	PLA
PuroWash15_PLA	1.38709	PuroWash15	PLA
PuroWash15_PLA	1.01372	PuroWash15	PLA
PuroWash15_PLA	0.903171	PuroWash15	PLA
PuroWash15_PLA	0.755674	PuroWash15	PLA
PuroWash15_PLA	0.903635	PuroWash15	PLA
PuroWash15_PLA	1.62753	PuroWash15	PLA
PuroWash15_PLA	1.56137	PuroWash15	PLA
PuroWash15_PLA	0.872617	PuroWash15	PLA
PuroWash15_PLA	1.88056	PuroWash15	PLA
PuroWash15_PLA	1.4017	PuroWash15	PLA
PuroWash15_PLA	0.954131	PuroWash15	PLA
PuroWash15_PLA	1.74616	PuroWash15	PLA
PuroWash15_PLA	1.18785	PuroWash15	PLA
PuroWash15_PLA	2.09258	PuroWash15	PLA
PuroWash15_PLA	1.51711	PuroWash15	PLA
PuroWash15_PLA	1.34856	PuroWash15	PLA
PuroWash15_PLA	1.85751	PuroWash15	PLA
PuroWash15_PLA	0.481682	PuroWash15	PLA
PuroWash15_PLA	0.796664	PuroWash15	PLA
PuroWash15_PLA	0.677248	PuroWash15	PLA
PuroWash15_PLA	0.646496	PuroWash15	PLA
PuroWash15_PLA	1.10561	PuroWash15	PLA
PuroWash15_PLA	0.757987	PuroWash15	PLA
PuroWash15_PLA	0.764641	PuroWash15	PLA
PuroWash15_PLA	0.74448	PuroWash15	PLA
PuroWash15_PLA	1.23747	PuroWash15	PLA
PuroWash15_PLA	1.74682	PuroWash15	PLA
PuroWash15_PLA	1.16779	PuroWash15	PLA
PuroWash15_PLA	0.818415	PuroWash15	PLA
PuroWash15_PLA	0.658112	PuroWash15	PLA
PuroWash15_PLA	0.815443	PuroWash15	PLA
PuroWash15_PLA	0.719917	PuroWash15	PLA
PuroWash15_PLA	0.433853	PuroWash15	PLA
PuroWash15_PLA	1.45689	PuroWash15	PLA
PuroWash15_PLA	0.88316	PuroWash15	PLA
PuroWash15_PLA	0.603075	PuroWash15	PLA
PuroWash15_PLA	1.64088	PuroWash15	PLA
PuroWash15_PLA	0.727281	PuroWash15	PLA
PuroWash15_PLA	1.30206	PuroWash15	PLA
PuroWash15_PLA	0.994838	PuroWash15	PLA
PuroWash15_PLA	1.20923	PuroWash15	PLA
PuroWash15_PLA	1.09648	PuroWash15	PLA
PuroWash15_PLA	1.85723	PuroWash15	PLA
PuroWash15_PLA	0.696679	PuroWash15	PLA
PuroWash15_PLA	1.04948	PuroWash15	PLA
PuroWash15_PLA	1.47102	PuroWash15	PLA
PuroWash15_PLA	1.38845	PuroWash15	PLA
PuroWash15_PLA	1.24479	PuroWash15	PLA
PuroWash15_PLA	1.76776	PuroWash15	PLA
PuroWash15_PLA	0.670615	PuroWash15	PLA
PuroWash15_PLA	0.895793	PuroWash15	PLA
PuroWash15_PLA	1.43955	PuroWash15	PLA
PuroWash15_PLA	1.11255	PuroWash15	PLA
PuroWash15_PLA	1.36071	PuroWash15	PLA
PuroWash15_PLA	1.41673	PuroWash15	PLA
PuroWash15_PLA	1.4672	PuroWash15	PLA
PuroWash15_PLA	1.77883	PuroWash15	PLA
PuroWash15_PLA	1.63287	PuroWash15	PLA
PuroWash15_PLA	2.15703	PuroWash15	PLA
PuroWash15_PLA	1.17729	PuroWash15	PLA
PuroWash15_PLA	0.813687	PuroWash15	PLA
PuroWash15_PLA	1.63231	PuroWash15	PLA
PuroWash15_PLA	1.14922	PuroWash15	PLA
PuroWash15_PLA	1.59512	PuroWash15	PLA
PuroWash15_PLA	1.24357	PuroWash15	PLA
PuroWash15_PLA	0.764607	PuroWash15	PLA
PuroWash15_PLA	0.838223	PuroWash15	PLA
PuroWash15_PLA	0.98769	PuroWash15	PLA
PuroWash15_PLA	1.13022	PuroWash15	PLA
PuroWash15_PLA	1.35041	PuroWash15	PLA
PuroWash15_PLA	1.1373	PuroWash15	PLA
PuroWash15_PLA	1.65418	PuroWash15	PLA
PuroWash15_PLA	0.757909	PuroWash15	PLA
PuroWash15_PLA	0.971979	PuroWash15	PLA
PuroWash15_PLA	1.22072	PuroWash15	PLA
PuroWash15_PLA	1.10898	PuroWash15	PLA
PuroWash15_PLA	1.21183	PuroWash15	PLA
PuroWash15_PLA	0.952678	PuroWash15	PLA
PuroWash15_PLA	0.750051	PuroWash15	PLA
PuroWash15_PLA	0.677145	PuroWash15	PLA
PuroWash15_PLA	0.823111	PuroWash15	PLA
PuroWash15_PLA	1.18303	PuroWash15	PLA
PuroWash15_PLA	0.672734	PuroWash15	PLA
PuroWash15_PLA	0.903018	PuroWash15	PLA
PuroWash15_PLA	0.452854	PuroWash15	PLA
PuroWash15_PLA	0.561805	PuroWash15	PLA
PuroWash15_PLA	0.432529	PuroWash15	PLA
PuroWash15_PLA	0.415225	PuroWash15	PLA
PuroWash15_PLA	0.340244	PuroWash15	PLA
PuroWash15_PLA	1.08671	PuroWash15	PLA
PuroWash15_PLA	0.487144	PuroWash15	PLA
PuroWash15_PLA	0.372305	PuroWash15	PLA
PuroWash15_PLA	0.251042	PuroWash15	PLA
PuroWash15_PLA	0.407887	PuroWash15	PLA
PuroWash15_PLA	0.642129	PuroWash15	PLA
PuroWash15_PLA	0.225926	PuroWash15	PLA
PuroWash15_PLA	0.366205	PuroWash15	PLA
PuroWash15_PLA	2.15713	PuroWash15	PLA
PuroWash15_PLA	0.183749	PuroWash15	PLA
PuroWash15_PLA	0.900829	PuroWash15	PLA
PuroWash15_PLA	0.494081	PuroWash15	PLA
PuroWash15_PLA	0.320141	PuroWash15	PLA
PuroWash15_PLA	0.253574	PuroWash15	PLA
PuroWash15_PLA	0.981842	PuroWash15	PLA
PuroWash15_PLA	0.43439	PuroWash15	PLA
PuroWash15_PLA	0.453972	PuroWash15	PLA
PuroWash15_PLA	0.361414	PuroWash15	PLA
PuroWash15_PLA	0.0952965	PuroWash15	PLA
PuroWash15_PLA	0.72757	PuroWash15	PLA
PuroWash15_PLA	0.407002	PuroWash15	PLA
PuroWash15_PLA	0.389174	PuroWash15	PLA
PuroWash15_PLA	0.354714	PuroWash15	PLA
PuroWash15_PLA	0.838458	PuroWash15	PLA
PuroWash15_PLA		PuroWash15	PLA
PuroWash15_PLA		PuroWash15	PLA
PuroWash15_PLA		PuroWash15	PLA
PuroWash15_PLA		PuroWash15	PLA
PuroWash15_PLA		PuroWash15	PLA
PuroWash15_PLA		PuroWash15	PLA
PuroWash15_PLA		PuroWash15	PLA
PuroWash15_PLA		PuroWash15	PLA
PuroWash15_PLA		PuroWash15	PLA
PuroWash15_PLA		PuroWash15	PLA
PuroWash15_PLA		PuroWash15	PLA
PuroWash15_PLA		PuroWash15	PLA
PuroWash15_PLA		PuroWash15	PLA
PuroWash15_PLA		PuroWash15	PLA
PuroWash15_PLA		PuroWash15	PLA
PuroWash15_PLA		PuroWash15	PLA
PuroWash15_PLA		PuroWash15	PLA
PuroWash15_PLA		PuroWash15	PLA
PuroWash15_PLA		PuroWash15	PLA
PuroWash15_PLA		PuroWash15	PLA
PuroWash15_PLA		PuroWash15	PLA
PuroWash15_PLA		PuroWash15	PLA
PuroWash15_PLA		PuroWash15	PLA
PuroWash15_PLA		PuroWash15	PLA
PuroWash15_PLA		PuroWash15	PLA
PuroWash15_PLA		PuroWash15	PLA
PuroWash15_PLA		PuroWash15	PLA
PuroWash15_PLA		PuroWash15	PLA
PuroWash15_PLA		PuroWash15	PLA
PuroWash15_PLA		PuroWash15	PLA
PuroWash15_PLA		PuroWash15	PLA
PuroWash15_PLA		PuroWash15	PLA
PuroWash15_PLA		PuroWash15	PLA
PuroWash15_PLA		PuroWash15	PLA
PuroWash15_PLA		PuroWash15	PLA
PuroWash15_PLA		PuroWash15	PLA
PuroWash15_PLA		PuroWash15	PLA
PuroWash15_PLA		PuroWash15	PLA
PuroWash15_PLA		PuroWash15	PLA
PuroWash15_PLA		PuroWash15	PLA
PuroWash15_PLA		PuroWash15	PLA
PuroWash15_PLA		PuroWash15	PLA
PuroWash15_PLA		PuroWash15	PLA
PuroWash15_PLA		PuroWash15	PLA
PuroWash15_PLA		PuroWash15	PLA
PuroWash15_PLA		PuroWash15	PLA
PuroWash15_PLA		PuroWash15	PLA
PuroWash15_PLA		PuroWash15	PLA
PuroWash15_PLA		PuroWash15	PLA
PuroWash15_PLA		PuroWash15	PLA
PuroWash15_PLA		PuroWash15	PLA
PuroWash15_PLA		PuroWash15	PLA
PuroWash15_PLA		PuroWash15	PLA
PuroWash15_PLA		PuroWash15	PLA
PuroWash15_PLA		PuroWash15	PLA
PuroWash15_PLA		PuroWash15	PLA
PuroWash15_PLA		PuroWash15	PLA
PuroWash15_PLA		PuroWash15	PLA
PuroWash15_PLA		PuroWash15	PLA
PuroWash15_PLA		PuroWash15	PLA
PuroWash15_PLA		PuroWash15	PLA
PuroWash15_PLA		PuroWash15	PLA
PuroWash15_PLA		PuroWash15	PLA
PuroWash15_PLA		PuroWash15	PLA
PuroWash45_IF		PuroWash45	IF
PuroWash45_IF		PuroWash45	IF
PuroWash45_IF		PuroWash45	IF
PuroWash45_IF		PuroWash45	IF
PuroWash45_IF		PuroWash45	IF
PuroWash45_IF		PuroWash45	IF
PuroWash45_IF		PuroWash45	IF
PuroWash45_IF		PuroWash45	IF
PuroWash45_IF		PuroWash45	IF
PuroWash45_IF		PuroWash45	IF
PuroWash45_IF		PuroWash45	IF
PuroWash45_IF		PuroWash45	IF
PuroWash45_IF		PuroWash45	IF
PuroWash45_IF		PuroWash45	IF
PuroWash45_IF		PuroWash45	IF
PuroWash45_IF		PuroWash45	IF
PuroWash45_IF		PuroWash45	IF
PuroWash45_IF		PuroWash45	IF
PuroWash45_IF		PuroWash45	IF
PuroWash45_IF		PuroWash45	IF
PuroWash45_IF		PuroWash45	IF
PuroWash45_IF		PuroWash45	IF
PuroWash45_IF		PuroWash45	IF
PuroWash45_IF		PuroWash45	IF
PuroWash45_IF		PuroWash45	IF
PuroWash45_IF		PuroWash45	IF
PuroWash45_IF		PuroWash45	IF
PuroWash45_IF		PuroWash45	IF
PuroWash45_IF		PuroWash45	IF
PuroWash45_IF		PuroWash45	IF
PuroWash45_IF		PuroWash45	IF
PuroWash45_IF		PuroWash45	IF
PuroWash45_IF		PuroWash45	IF
PuroWash45_IF		PuroWash45	IF
PuroWash45_IF		PuroWash45	IF
PuroWash45_IF		PuroWash45	IF
PuroWash45_IF		PuroWash45	IF
PuroWash45_IF		PuroWash45	IF
PuroWash45_IF		PuroWash45	IF
PuroWash45_IF		PuroWash45	IF
PuroWash45_IF		PuroWash45	IF
PuroWash45_IF		PuroWash45	IF
PuroWash45_IF		PuroWash45	IF
PuroWash45_IF		PuroWash45	IF
PuroWash45_IF		PuroWash45	IF
PuroWash45_IF		PuroWash45	IF
PuroWash45_IF		PuroWash45	IF
PuroWash45_IF		PuroWash45	IF
PuroWash45_IF		PuroWash45	IF
PuroWash45_IF		PuroWash45	IF
PuroWash45_IF		PuroWash45	IF
PuroWash45_IF		PuroWash45	IF
PuroWash45_IF		PuroWash45	IF
PuroWash45_IF		PuroWash45	IF
PuroWash45_IF		PuroWash45	IF
PuroWash45_IF		PuroWash45	IF
PuroWash45_IF		PuroWash45	IF
PuroWash45_IF		PuroWash45	IF
PuroWash45_IF		PuroWash45	IF
PuroWash45_IF		PuroWash45	IF
PuroWash45_IF		PuroWash45	IF
PuroWash45_IF		PuroWash45	IF
PuroWash45_IF		PuroWash45	IF
PuroWash45_IF		PuroWash45	IF
PuroWash45_IF		PuroWash45	IF
PuroWash45_IF		PuroWash45	IF
PuroWash45_IF		PuroWash45	IF
PuroWash45_IF		PuroWash45	IF
PuroWash45_IF		PuroWash45	IF
PuroWash45_IF		PuroWash45	IF
PuroWash45_IF		PuroWash45	IF
PuroWash45_IF		PuroWash45	IF
PuroWash45_IF		PuroWash45	IF
PuroWash45_IF		PuroWash45	IF
PuroWash45_IF		PuroWash45	IF
PuroWash45_IF		PuroWash45	IF
PuroWash45_IF		PuroWash45	IF
PuroWash45_IF		PuroWash45	IF
PuroWash45_IF		PuroWash45	IF
PuroWash45_IF		PuroWash45	IF
PuroWash45_IF		PuroWash45	IF
PuroWash45_IF		PuroWash45	IF
PuroWash45_IF		PuroWash45	IF
PuroWash45_IF		PuroWash45	IF
PuroWash45_IF		PuroWash45	IF
PuroWash45_IF		PuroWash45	IF
PuroWash45_IF		PuroWash45	IF
PuroWash45_IF		PuroWash45	IF
PuroWash45_IF		PuroWash45	IF
PuroWash45_IF		PuroWash45	IF
PuroWash45_IF		PuroWash45	IF
PuroWash45_IF		PuroWash45	IF
PuroWash45_IF		PuroWash45	IF
PuroWash45_IF		PuroWash45	IF
PuroWash45_IF		PuroWash45	IF
PuroWash45_IF		PuroWash45	IF
PuroWash45_IF	0.711665	PuroWash45	IF
PuroWash45_IF	0.902084	PuroWash45	IF
PuroWash45_IF	1.22948	PuroWash45	IF
PuroWash45_IF	1.16291	PuroWash45	IF
PuroWash45_IF	0.484255	PuroWash45	IF
PuroWash45_IF	0.605096	PuroWash45	IF
PuroWash45_IF	0.501518	PuroWash45	IF
PuroWash45_IF	0.899857	PuroWash45	IF
PuroWash45_IF	0.495485	PuroWash45	IF
PuroWash45_IF	0.968005	PuroWash45	IF
PuroWash45_IF	0.712907	PuroWash45	IF
PuroWash45_IF	0.823367	PuroWash45	IF
PuroWash45_IF	0.646257	PuroWash45	IF
PuroWash45_IF	2.15215	PuroWash45	IF
PuroWash45_IF	0.492942	PuroWash45	IF
PuroWash45_IF	0.832534	PuroWash45	IF
PuroWash45_IF	0.625688	PuroWash45	IF
PuroWash45_IF	1.29743	PuroWash45	IF
PuroWash45_IF	0.784901	PuroWash45	IF
PuroWash45_IF	0.770049	PuroWash45	IF
PuroWash45_IF	1.05473	PuroWash45	IF
PuroWash45_IF	1.14709	PuroWash45	IF
PuroWash45_IF	0.876165	PuroWash45	IF
PuroWash45_IF	1.28763	PuroWash45	IF
PuroWash45_IF	1.10101	PuroWash45	IF
PuroWash45_IF	0.763196	PuroWash45	IF
PuroWash45_IF	0.623212	PuroWash45	IF
PuroWash45_IF	1.2537	PuroWash45	IF
PuroWash45_IF	2.09888	PuroWash45	IF
PuroWash45_IF	1.34736	PuroWash45	IF
PuroWash45_IF	2.15443	PuroWash45	IF
PuroWash45_IF	0.957263	PuroWash45	IF
PuroWash45_IF	0.876377	PuroWash45	IF
PuroWash45_IF	1.21953	PuroWash45	IF
PuroWash45_IF	0.917738	PuroWash45	IF
PuroWash45_IF	1.94693	PuroWash45	IF
PuroWash45_IF	1.34186	PuroWash45	IF
PuroWash45_IF	1.32341	PuroWash45	IF
PuroWash45_IF	0.981308	PuroWash45	IF
PuroWash45_IF	1.11292	PuroWash45	IF
PuroWash45_IF	0.609901	PuroWash45	IF
PuroWash45_IF	1.36458	PuroWash45	IF
PuroWash45_IF	0.8638	PuroWash45	IF
PuroWash45_IF	1.18102	PuroWash45	IF
PuroWash45_IF	1.48235	PuroWash45	IF
PuroWash45_IF	2.37156	PuroWash45	IF
PuroWash45_IF	2.18391	PuroWash45	IF
PuroWash45_IF	1.66305	PuroWash45	IF
PuroWash45_IF	0.614917	PuroWash45	IF
PuroWash45_IF	1.55545	PuroWash45	IF
PuroWash45_IF	1.05938	PuroWash45	IF
PuroWash45_IF	1.82581	PuroWash45	IF
PuroWash45_IF	1.21411	PuroWash45	IF
PuroWash45_IF	1.3943	PuroWash45	IF
PuroWash45_IF	0.868214	PuroWash45	IF
PuroWash45_IF	1.12903	PuroWash45	IF
PuroWash45_IF	0.463072	PuroWash45	IF
PuroWash45_IF	0.874734	PuroWash45	IF
PuroWash45_IF	0.645621	PuroWash45	IF
PuroWash45_IF	1.0496	PuroWash45	IF
PuroWash45_IF	0.519481	PuroWash45	IF
PuroWash45_IF	0.942059	PuroWash45	IF
PuroWash45_IF	1.38065	PuroWash45	IF
PuroWash45_IF	1.17342	PuroWash45	IF
PuroWash45_IF	1.29394	PuroWash45	IF
PuroWash45_IF	0.52513	PuroWash45	IF
PuroWash45_IF	0.984056	PuroWash45	IF
PuroWash45_IF	0.988452	PuroWash45	IF
PuroWash45_IF	0.938597	PuroWash45	IF
PuroWash45_IF	1.31124	PuroWash45	IF
PuroWash45_IF	1.04744	PuroWash45	IF
PuroWash45_IF	0.792132	PuroWash45	IF
PuroWash45_IF	2.54589	PuroWash45	IF
PuroWash45_IF	0.807589	PuroWash45	IF
PuroWash45_IF	1.09989	PuroWash45	IF
PuroWash45_IF	1.27684	PuroWash45	IF
PuroWash45_IF	0.984614	PuroWash45	IF
PuroWash45_IF	0.879628	PuroWash45	IF
PuroWash45_IF	0.895761	PuroWash45	IF
PuroWash45_IF	1.07055	PuroWash45	IF
PuroWash45_IF	0.841043	PuroWash45	IF
PuroWash45_IF	1.46644	PuroWash45	IF
PuroWash45_IF	1.17767	PuroWash45	IF
PuroWash45_IF	1.16746	PuroWash45	IF
PuroWash45_IF	1.09281	PuroWash45	IF
PuroWash45_IF	1.06311	PuroWash45	IF
PuroWash45_IF	1.44473	PuroWash45	IF
PuroWash45_IF	1.14505	PuroWash45	IF
PuroWash45_IF	1.56883	PuroWash45	IF
PuroWash45_IF	1.56375	PuroWash45	IF
PuroWash45_IF	1.26526	PuroWash45	IF
PuroWash45_IF	0.612963	PuroWash45	IF
PuroWash45_IF	1.33703	PuroWash45	IF
PuroWash45_IF	0.604217	PuroWash45	IF
PuroWash45_IF	1.58531	PuroWash45	IF
PuroWash45_IF	0.833939	PuroWash45	IF
PuroWash45_PLA		PuroWash45	PLA
PuroWash45_PLA		PuroWash45	PLA
PuroWash45_PLA		PuroWash45	PLA
PuroWash45_PLA		PuroWash45	PLA
PuroWash45_PLA		PuroWash45	PLA
PuroWash45_PLA		PuroWash45	PLA
PuroWash45_PLA		PuroWash45	PLA
PuroWash45_PLA		PuroWash45	PLA
PuroWash45_PLA		PuroWash45	PLA
PuroWash45_PLA		PuroWash45	PLA
PuroWash45_PLA		PuroWash45	PLA
PuroWash45_PLA		PuroWash45	PLA
PuroWash45_PLA		PuroWash45	PLA
PuroWash45_PLA		PuroWash45	PLA
PuroWash45_PLA		PuroWash45	PLA
PuroWash45_PLA		PuroWash45	PLA
PuroWash45_PLA		PuroWash45	PLA
PuroWash45_PLA		PuroWash45	PLA
PuroWash45_PLA		PuroWash45	PLA
PuroWash45_PLA		PuroWash45	PLA
PuroWash45_PLA		PuroWash45	PLA
PuroWash45_PLA		PuroWash45	PLA
PuroWash45_PLA		PuroWash45	PLA
PuroWash45_PLA		PuroWash45	PLA
PuroWash45_PLA		PuroWash45	PLA
PuroWash45_PLA		PuroWash45	PLA
PuroWash45_PLA		PuroWash45	PLA
PuroWash45_PLA		PuroWash45	PLA
PuroWash45_PLA		PuroWash45	PLA
PuroWash45_PLA		PuroWash45	PLA
PuroWash45_PLA		PuroWash45	PLA
PuroWash45_PLA		PuroWash45	PLA
PuroWash45_PLA		PuroWash45	PLA
PuroWash45_PLA		PuroWash45	PLA
PuroWash45_PLA		PuroWash45	PLA
PuroWash45_PLA		PuroWash45	PLA
PuroWash45_PLA		PuroWash45	PLA
PuroWash45_PLA		PuroWash45	PLA
PuroWash45_PLA		PuroWash45	PLA
PuroWash45_PLA		PuroWash45	PLA
PuroWash45_PLA		PuroWash45	PLA
PuroWash45_PLA		PuroWash45	PLA
PuroWash45_PLA		PuroWash45	PLA
PuroWash45_PLA		PuroWash45	PLA
PuroWash45_PLA		PuroWash45	PLA
PuroWash45_PLA		PuroWash45	PLA
PuroWash45_PLA		PuroWash45	PLA
PuroWash45_PLA		PuroWash45	PLA
PuroWash45_PLA		PuroWash45	PLA
PuroWash45_PLA		PuroWash45	PLA
PuroWash45_PLA		PuroWash45	PLA
PuroWash45_PLA		PuroWash45	PLA
PuroWash45_PLA		PuroWash45	PLA
PuroWash45_PLA		PuroWash45	PLA
PuroWash45_PLA		PuroWash45	PLA
PuroWash45_PLA		PuroWash45	PLA
PuroWash45_PLA		PuroWash45	PLA
PuroWash45_PLA		PuroWash45	PLA
PuroWash45_PLA		PuroWash45	PLA
PuroWash45_PLA		PuroWash45	PLA
PuroWash45_PLA		PuroWash45	PLA
PuroWash45_PLA		PuroWash45	PLA
PuroWash45_PLA		PuroWash45	PLA
PuroWash45_PLA		PuroWash45	PLA
PuroWash45_PLA		PuroWash45	PLA
PuroWash45_PLA		PuroWash45	PLA
PuroWash45_PLA		PuroWash45	PLA
PuroWash45_PLA		PuroWash45	PLA
PuroWash45_PLA		PuroWash45	PLA
PuroWash45_PLA		PuroWash45	PLA
PuroWash45_PLA		PuroWash45	PLA
PuroWash45_PLA		PuroWash45	PLA
PuroWash45_PLA		PuroWash45	PLA
PuroWash45_PLA		PuroWash45	PLA
PuroWash45_PLA		PuroWash45	PLA
PuroWash45_PLA		PuroWash45	PLA
PuroWash45_PLA		PuroWash45	PLA
PuroWash45_PLA		PuroWash45	PLA
PuroWash45_PLA		PuroWash45	PLA
PuroWash45_PLA		PuroWash45	PLA
PuroWash45_PLA		PuroWash45	PLA
PuroWash45_PLA		PuroWash45	PLA
PuroWash45_PLA		PuroWash45	PLA
PuroWash45_PLA		PuroWash45	PLA
PuroWash45_PLA		PuroWash45	PLA
PuroWash45_PLA		PuroWash45	PLA
PuroWash45_PLA		PuroWash45	PLA
PuroWash45_PLA		PuroWash45	PLA
PuroWash45_PLA		PuroWash45	PLA
PuroWash45_PLA		PuroWash45	PLA
PuroWash45_PLA		PuroWash45	PLA
PuroWash45_PLA		PuroWash45	PLA
PuroWash45_PLA		PuroWash45	PLA
PuroWash45_PLA		PuroWash45	PLA
PuroWash45_PLA		PuroWash45	PLA
PuroWash45_PLA		PuroWash45	PLA
PuroWash45_PLA	3.08086	PuroWash45	PLA
PuroWash45_PLA	1.0455	PuroWash45	PLA
PuroWash45_PLA	1.15338	PuroWash45	PLA
PuroWash45_PLA	0.419427	PuroWash45	PLA
PuroWash45_PLA	0.559782	PuroWash45	PLA
PuroWash45_PLA	0.399759	PuroWash45	PLA
PuroWash45_PLA	0.537444	PuroWash45	PLA
PuroWash45_PLA	0.645028	PuroWash45	PLA
PuroWash45_PLA	1.22172	PuroWash45	PLA
PuroWash45_PLA	0.636854	PuroWash45	PLA
PuroWash45_PLA	0.457571	PuroWash45	PLA
PuroWash45_PLA	0.467309	PuroWash45	PLA
PuroWash45_PLA	0.807666	PuroWash45	PLA
PuroWash45_PLA	1.83936	PuroWash45	PLA
PuroWash45_PLA	1.39636	PuroWash45	PLA
PuroWash45_PLA	1.22001	PuroWash45	PLA
PuroWash45_PLA	1.76141	PuroWash45	PLA
PuroWash45_PLA	1.46788	PuroWash45	PLA
PuroWash45_PLA	2.13367	PuroWash45	PLA
PuroWash45_PLA	0.816237	PuroWash45	PLA
PuroWash45_PLA	0.911055	PuroWash45	PLA
PuroWash45_PLA	0.962958	PuroWash45	PLA
PuroWash45_PLA	1.33102	PuroWash45	PLA
PuroWash45_PLA	0.771346	PuroWash45	PLA
PuroWash45_PLA	0.643129	PuroWash45	PLA
PuroWash45_PLA	1.28327	PuroWash45	PLA
PuroWash45_PLA	0.436345	PuroWash45	PLA
PuroWash45_PLA	0.905563	PuroWash45	PLA
PuroWash45_PLA	0.638643	PuroWash45	PLA
PuroWash45_PLA	3.94041	PuroWash45	PLA
PuroWash45_PLA	1.15256	PuroWash45	PLA
PuroWash45_PLA	2.23587	PuroWash45	PLA
PuroWash45_PLA	1.18791	PuroWash45	PLA
PuroWash45_PLA	0.61753	PuroWash45	PLA
PuroWash45_PLA	0.692161	PuroWash45	PLA
PuroWash45_PLA	0.550117	PuroWash45	PLA
PuroWash45_PLA	1.39565	PuroWash45	PLA
PuroWash45_PLA	0.269557	PuroWash45	PLA
PuroWash45_PLA	0.676612	PuroWash45	PLA
PuroWash45_PLA	0.798934	PuroWash45	PLA
PuroWash45_PLA	0.807866	PuroWash45	PLA
PuroWash45_PLA	1.50813	PuroWash45	PLA
PuroWash45_PLA	0.873836	PuroWash45	PLA
PuroWash45_PLA	0.798448	PuroWash45	PLA
PuroWash45_PLA	0.526928	PuroWash45	PLA
PuroWash45_PLA	1.1608	PuroWash45	PLA
PuroWash45_PLA	0.715002	PuroWash45	PLA
PuroWash45_PLA	0.573911	PuroWash45	PLA
PuroWash45_PLA	1.13114	PuroWash45	PLA
PuroWash45_PLA	0.552047	PuroWash45	PLA
PuroWash45_PLA	1.21637	PuroWash45	PLA
PuroWash45_PLA	0.703039	PuroWash45	PLA
PuroWash45_PLA	0.733096	PuroWash45	PLA
PuroWash45_PLA	0.534951	PuroWash45	PLA
PuroWash45_PLA	0.538674	PuroWash45	PLA
PuroWash45_PLA	0.526821	PuroWash45	PLA
PuroWash45_PLA	0.495404	PuroWash45	PLA
PuroWash45_PLA	0.613746	PuroWash45	PLA
PuroWash45_PLA	1.08902	PuroWash45	PLA
PuroWash45_PLA	1.60263	PuroWash45	PLA
PuroWash45_PLA	0.756112	PuroWash45	PLA
PuroWash45_PLA	0.859419	PuroWash45	PLA
PuroWash45_PLA	0.438812	PuroWash45	PLA
PuroWash45_PLA	0.940649	PuroWash45	PLA
PuroWash45_PLA	1.50203	PuroWash45	PLA
PuroWash45_PLA	1.16949	PuroWash45	PLA
PuroWash45_PLA	1.05523	PuroWash45	PLA
PuroWash45_PLA	0.53834	PuroWash45	PLA
PuroWash45_PLA	1.18059	PuroWash45	PLA
PuroWash45_PLA	0.95815	PuroWash45	PLA
PuroWash45_PLA	1.71181	PuroWash45	PLA
PuroWash45_PLA	0.591288	PuroWash45	PLA
PuroWash45_PLA	2.31913	PuroWash45	PLA
PuroWash45_PLA	0.91433	PuroWash45	PLA
PuroWash45_PLA	0.569127	PuroWash45	PLA
PuroWash45_PLA	0.894424	PuroWash45	PLA
PuroWash45_PLA	0.920853	PuroWash45	PLA
PuroWash45_PLA	1.03649	PuroWash45	PLA
PuroWash45_PLA	0.841083	PuroWash45	PLA
PuroWash45_PLA	1.67693	PuroWash45	PLA
PuroWash45_PLA	0.971707	PuroWash45	PLA
PuroWash45_PLA	0.872654	PuroWash45	PLA
PuroWash45_PLA	1.30011	PuroWash45	PLA
PuroWash45_PLA	0.576888	PuroWash45	PLA
PuroWash45_PLA	0.175369	PuroWash45	PLA
PuroWash45_PLA	0.522416	PuroWash45	PLA
PuroWash45_PLA	1.05082	PuroWash45	PLA
PuroWash45_PLA	0.594941	PuroWash45	PLA
PuroWash45_PLA	0.652435	PuroWash45	PLA
PuroWash45_PLA	0.258694	PuroWash45	PLA
PuroWash45_PLA	0.642499	PuroWash45	PLA
PuroWash45_PLA	1.05232	PuroWash45	PLA
PuroWash45_PLA	0.611531	PuroWash45	PLA
PuroWash45_PLA	1.02254	PuroWash45	PLA
PuroWash45_PLA	0.9062	PuroWash45	PLA
PuroWash45_PLA	0.82762	PuroWash45	PLA
HarrPuro_IF		HarrPuro	IF
HarrPuro_IF		HarrPuro	IF
HarrPuro_IF		HarrPuro	IF
HarrPuro_IF		HarrPuro	IF
HarrPuro_IF		HarrPuro	IF
HarrPuro_IF		HarrPuro	IF
HarrPuro_IF		HarrPuro	IF
HarrPuro_IF		HarrPuro	IF
HarrPuro_IF		HarrPuro	IF
HarrPuro_IF		HarrPuro	IF
HarrPuro_IF		HarrPuro	IF
HarrPuro_IF		HarrPuro	IF
HarrPuro_IF		HarrPuro	IF
HarrPuro_IF		HarrPuro	IF
HarrPuro_IF		HarrPuro	IF
HarrPuro_IF		HarrPuro	IF
HarrPuro_IF		HarrPuro	IF
HarrPuro_IF		HarrPuro	IF
HarrPuro_IF		HarrPuro	IF
HarrPuro_IF		HarrPuro	IF
HarrPuro_IF		HarrPuro	IF
HarrPuro_IF		HarrPuro	IF
HarrPuro_IF		HarrPuro	IF
HarrPuro_IF		HarrPuro	IF
HarrPuro_IF		HarrPuro	IF
HarrPuro_IF		HarrPuro	IF
HarrPuro_IF		HarrPuro	IF
HarrPuro_IF		HarrPuro	IF
HarrPuro_IF		HarrPuro	IF
HarrPuro_IF		HarrPuro	IF
HarrPuro_IF		HarrPuro	IF
HarrPuro_IF		HarrPuro	IF
HarrPuro_IF		HarrPuro	IF
HarrPuro_IF		HarrPuro	IF
HarrPuro_IF		HarrPuro	IF
HarrPuro_IF		HarrPuro	IF
HarrPuro_IF		HarrPuro	IF
HarrPuro_IF		HarrPuro	IF
HarrPuro_IF		HarrPuro	IF
HarrPuro_IF		HarrPuro	IF
HarrPuro_IF		HarrPuro	IF
HarrPuro_IF		HarrPuro	IF
HarrPuro_IF		HarrPuro	IF
HarrPuro_IF		HarrPuro	IF
HarrPuro_IF		HarrPuro	IF
HarrPuro_IF		HarrPuro	IF
HarrPuro_IF		HarrPuro	IF
HarrPuro_IF		HarrPuro	IF
HarrPuro_IF		HarrPuro	IF
HarrPuro_IF		HarrPuro	IF
HarrPuro_IF		HarrPuro	IF
HarrPuro_IF		HarrPuro	IF
HarrPuro_IF		HarrPuro	IF
HarrPuro_IF		HarrPuro	IF
HarrPuro_IF		HarrPuro	IF
HarrPuro_IF		HarrPuro	IF
HarrPuro_IF		HarrPuro	IF
HarrPuro_IF		HarrPuro	IF
HarrPuro_IF		HarrPuro	IF
HarrPuro_IF		HarrPuro	IF
HarrPuro_IF		HarrPuro	IF
HarrPuro_IF		HarrPuro	IF
HarrPuro_IF		HarrPuro	IF
HarrPuro_IF		HarrPuro	IF
HarrPuro_IF		HarrPuro	IF
HarrPuro_IF		HarrPuro	IF
HarrPuro_IF		HarrPuro	IF
HarrPuro_IF		HarrPuro	IF
HarrPuro_IF		HarrPuro	IF
HarrPuro_IF		HarrPuro	IF
HarrPuro_IF		HarrPuro	IF
HarrPuro_IF		HarrPuro	IF
HarrPuro_IF		HarrPuro	IF
HarrPuro_IF		HarrPuro	IF
HarrPuro_IF		HarrPuro	IF
HarrPuro_IF		HarrPuro	IF
HarrPuro_IF		HarrPuro	IF
HarrPuro_IF		HarrPuro	IF
HarrPuro_IF		HarrPuro	IF
HarrPuro_IF		HarrPuro	IF
HarrPuro_IF		HarrPuro	IF
HarrPuro_IF		HarrPuro	IF
HarrPuro_IF		HarrPuro	IF
HarrPuro_IF		HarrPuro	IF
HarrPuro_IF		HarrPuro	IF
HarrPuro_IF		HarrPuro	IF
HarrPuro_IF		HarrPuro	IF
HarrPuro_IF		HarrPuro	IF
HarrPuro_IF		HarrPuro	IF
HarrPuro_IF		HarrPuro	IF
HarrPuro_IF		HarrPuro	IF
HarrPuro_IF		HarrPuro	IF
HarrPuro_IF		HarrPuro	IF
HarrPuro_IF		HarrPuro	IF
HarrPuro_IF		HarrPuro	IF
HarrPuro_IF		HarrPuro	IF
HarrPuro_IF	0.0715451	HarrPuro	IF
HarrPuro_IF	0.102687	HarrPuro	IF
HarrPuro_IF	0.158395	HarrPuro	IF
HarrPuro_IF	0.0868633	HarrPuro	IF
HarrPuro_IF	0.0718584	HarrPuro	IF
HarrPuro_IF	0.0690132	HarrPuro	IF
HarrPuro_IF	0.035701	HarrPuro	IF
HarrPuro_IF	0.0749237	HarrPuro	IF
HarrPuro_IF	0.055237	HarrPuro	IF
HarrPuro_IF	0.086233	HarrPuro	IF
HarrPuro_IF	0.109176	HarrPuro	IF
HarrPuro_IF	0.124974	HarrPuro	IF
HarrPuro_IF	0.0740851	HarrPuro	IF
HarrPuro_IF	0.0981746	HarrPuro	IF
HarrPuro_IF	0.101306	HarrPuro	IF
HarrPuro_IF	0.0452001	HarrPuro	IF
HarrPuro_IF	0.0516558	HarrPuro	IF
HarrPuro_IF	0.11846	HarrPuro	IF
HarrPuro_IF	0.154273	HarrPuro	IF
HarrPuro_IF	0.0949924	HarrPuro	IF
HarrPuro_IF	0.113508	HarrPuro	IF
HarrPuro_IF	0.0933359	HarrPuro	IF
HarrPuro_IF	0.0729971	HarrPuro	IF
HarrPuro_IF	0.130626	HarrPuro	IF
HarrPuro_IF	0.057188	HarrPuro	IF
HarrPuro_IF	0.0449475	HarrPuro	IF
HarrPuro_IF	0.0460612	HarrPuro	IF
HarrPuro_IF	0.0853401	HarrPuro	IF
HarrPuro_IF	0.0734085	HarrPuro	IF
HarrPuro_IF	0.0658892	HarrPuro	IF
HarrPuro_IF	0.126055	HarrPuro	IF
HarrPuro_IF	0.116626	HarrPuro	IF
HarrPuro_IF	0.0752133	HarrPuro	IF
HarrPuro_IF	0.0934562	HarrPuro	IF
HarrPuro_IF	0.0615916	HarrPuro	IF
HarrPuro_IF	0.049101	HarrPuro	IF
HarrPuro_IF	0.0630229	HarrPuro	IF
HarrPuro_IF	0.0365391	HarrPuro	IF
HarrPuro_IF	0.0783174	HarrPuro	IF
HarrPuro_IF	0.0646318	HarrPuro	IF
HarrPuro_IF	0.102209	HarrPuro	IF
HarrPuro_IF	0.11033	HarrPuro	IF
HarrPuro_IF	0.0822468	HarrPuro	IF
HarrPuro_IF	0.128293	HarrPuro	IF
HarrPuro_IF	0.0876395	HarrPuro	IF
HarrPuro_IF	0.0951933	HarrPuro	IF
HarrPuro_IF	0.0531192	HarrPuro	IF
HarrPuro_IF	0.0856992	HarrPuro	IF
HarrPuro_IF	0.104879	HarrPuro	IF
HarrPuro_IF	0.0812232	HarrPuro	IF
HarrPuro_IF	0.122069	HarrPuro	IF
HarrPuro_IF	0.0805898	HarrPuro	IF
HarrPuro_IF	0.104602	HarrPuro	IF
HarrPuro_IF	0.0667885	HarrPuro	IF
HarrPuro_IF	0.11696	HarrPuro	IF
HarrPuro_IF	0.0885637	HarrPuro	IF
HarrPuro_IF	0.068772	HarrPuro	IF
HarrPuro_IF	0.090803	HarrPuro	IF
HarrPuro_IF	0.0739283	HarrPuro	IF
HarrPuro_IF	0.0633912	HarrPuro	IF
HarrPuro_IF	0.0942916	HarrPuro	IF
HarrPuro_IF	0.0983067	HarrPuro	IF
HarrPuro_IF	0.0954146	HarrPuro	IF
HarrPuro_IF	0.135557	HarrPuro	IF
HarrPuro_IF	0.134116	HarrPuro	IF
HarrPuro_IF	0.0921627	HarrPuro	IF
HarrPuro_IF	0.11725	HarrPuro	IF
HarrPuro_IF	0.0933883	HarrPuro	IF
HarrPuro_IF	0.181988	HarrPuro	IF
HarrPuro_IF	0.0800804	HarrPuro	IF
HarrPuro_IF	0.0943288	HarrPuro	IF
HarrPuro_IF	0.0812279	HarrPuro	IF
HarrPuro_IF	0.0653781	HarrPuro	IF
HarrPuro_IF	0.0851967	HarrPuro	IF
HarrPuro_IF	0.15528	HarrPuro	IF
HarrPuro_IF	0.138378	HarrPuro	IF
HarrPuro_IF	0.0659791	HarrPuro	IF
HarrPuro_IF	0.160001	HarrPuro	IF
HarrPuro_IF	0.104626	HarrPuro	IF
HarrPuro_IF	0.132149	HarrPuro	IF
HarrPuro_IF	0.0845946	HarrPuro	IF
HarrPuro_IF	0.0708934	HarrPuro	IF
HarrPuro_IF	0.130528	HarrPuro	IF
HarrPuro_IF	0.17689	HarrPuro	IF
HarrPuro_IF	0.0765668	HarrPuro	IF
HarrPuro_IF	0.109102	HarrPuro	IF
HarrPuro_IF	0.0991324	HarrPuro	IF
HarrPuro_IF	0.0993456	HarrPuro	IF
HarrPuro_IF	0.0808289	HarrPuro	IF
HarrPuro_IF	0.115943	HarrPuro	IF
HarrPuro_IF	0.13491	HarrPuro	IF
HarrPuro_IF	0.0972696	HarrPuro	IF
HarrPuro_IF	0.097703	HarrPuro	IF
HarrPuro_IF	0.265459	HarrPuro	IF
HarrPuro_IF	0.126524	HarrPuro	IF
HarrPuro_IF	0.10744	HarrPuro	IF
HarrPuro_PLA		HarrPuro	PLA
HarrPuro_PLA		HarrPuro	PLA
HarrPuro_PLA		HarrPuro	PLA
HarrPuro_PLA		HarrPuro	PLA
HarrPuro_PLA		HarrPuro	PLA
HarrPuro_PLA		HarrPuro	PLA
HarrPuro_PLA		HarrPuro	PLA
HarrPuro_PLA		HarrPuro	PLA
HarrPuro_PLA		HarrPuro	PLA
HarrPuro_PLA		HarrPuro	PLA
HarrPuro_PLA		HarrPuro	PLA
HarrPuro_PLA		HarrPuro	PLA
HarrPuro_PLA		HarrPuro	PLA
HarrPuro_PLA		HarrPuro	PLA
HarrPuro_PLA		HarrPuro	PLA
HarrPuro_PLA		HarrPuro	PLA
HarrPuro_PLA		HarrPuro	PLA
HarrPuro_PLA		HarrPuro	PLA
HarrPuro_PLA		HarrPuro	PLA
HarrPuro_PLA		HarrPuro	PLA
HarrPuro_PLA		HarrPuro	PLA
HarrPuro_PLA		HarrPuro	PLA
HarrPuro_PLA		HarrPuro	PLA
HarrPuro_PLA		HarrPuro	PLA
HarrPuro_PLA		HarrPuro	PLA
HarrPuro_PLA		HarrPuro	PLA
HarrPuro_PLA		HarrPuro	PLA
HarrPuro_PLA		HarrPuro	PLA
HarrPuro_PLA		HarrPuro	PLA
HarrPuro_PLA		HarrPuro	PLA
HarrPuro_PLA		HarrPuro	PLA
HarrPuro_PLA		HarrPuro	PLA
HarrPuro_PLA		HarrPuro	PLA
HarrPuro_PLA		HarrPuro	PLA
HarrPuro_PLA		HarrPuro	PLA
HarrPuro_PLA		HarrPuro	PLA
HarrPuro_PLA		HarrPuro	PLA
HarrPuro_PLA		HarrPuro	PLA
HarrPuro_PLA		HarrPuro	PLA
HarrPuro_PLA		HarrPuro	PLA
HarrPuro_PLA		HarrPuro	PLA
HarrPuro_PLA		HarrPuro	PLA
HarrPuro_PLA		HarrPuro	PLA
HarrPuro_PLA		HarrPuro	PLA
HarrPuro_PLA		HarrPuro	PLA
HarrPuro_PLA		HarrPuro	PLA
HarrPuro_PLA		HarrPuro	PLA
HarrPuro_PLA		HarrPuro	PLA
HarrPuro_PLA		HarrPuro	PLA
HarrPuro_PLA		HarrPuro	PLA
HarrPuro_PLA		HarrPuro	PLA
HarrPuro_PLA		HarrPuro	PLA
HarrPuro_PLA		HarrPuro	PLA
HarrPuro_PLA		HarrPuro	PLA
HarrPuro_PLA		HarrPuro	PLA
HarrPuro_PLA		HarrPuro	PLA
HarrPuro_PLA		HarrPuro	PLA
HarrPuro_PLA		HarrPuro	PLA
HarrPuro_PLA		HarrPuro	PLA
HarrPuro_PLA		HarrPuro	PLA
HarrPuro_PLA		HarrPuro	PLA
HarrPuro_PLA		HarrPuro	PLA
HarrPuro_PLA		HarrPuro	PLA
HarrPuro_PLA		HarrPuro	PLA
HarrPuro_PLA		HarrPuro	PLA
HarrPuro_PLA		HarrPuro	PLA
HarrPuro_PLA		HarrPuro	PLA
HarrPuro_PLA		HarrPuro	PLA
HarrPuro_PLA		HarrPuro	PLA
HarrPuro_PLA		HarrPuro	PLA
HarrPuro_PLA		HarrPuro	PLA
HarrPuro_PLA		HarrPuro	PLA
HarrPuro_PLA		HarrPuro	PLA
HarrPuro_PLA		HarrPuro	PLA
HarrPuro_PLA		HarrPuro	PLA
HarrPuro_PLA		HarrPuro	PLA
HarrPuro_PLA		HarrPuro	PLA
HarrPuro_PLA		HarrPuro	PLA
HarrPuro_PLA		HarrPuro	PLA
HarrPuro_PLA		HarrPuro	PLA
HarrPuro_PLA		HarrPuro	PLA
HarrPuro_PLA		HarrPuro	PLA
HarrPuro_PLA		HarrPuro	PLA
HarrPuro_PLA		HarrPuro	PLA
HarrPuro_PLA		HarrPuro	PLA
HarrPuro_PLA		HarrPuro	PLA
HarrPuro_PLA		HarrPuro	PLA
HarrPuro_PLA		HarrPuro	PLA
HarrPuro_PLA		HarrPuro	PLA
HarrPuro_PLA		HarrPuro	PLA
HarrPuro_PLA		HarrPuro	PLA
HarrPuro_PLA		HarrPuro	PLA
HarrPuro_PLA		HarrPuro	PLA
HarrPuro_PLA		HarrPuro	PLA
HarrPuro_PLA		HarrPuro	PLA
HarrPuro_PLA		HarrPuro	PLA
HarrPuro_PLA	0.180271	HarrPuro	PLA
HarrPuro_PLA	0.191078	HarrPuro	PLA
HarrPuro_PLA	0.184493	HarrPuro	PLA
HarrPuro_PLA	0.253514	HarrPuro	PLA
HarrPuro_PLA	0.158086	HarrPuro	PLA
HarrPuro_PLA	0.181519	HarrPuro	PLA
HarrPuro_PLA	0.133944	HarrPuro	PLA
HarrPuro_PLA	0.180026	HarrPuro	PLA
HarrPuro_PLA	0.0679993	HarrPuro	PLA
HarrPuro_PLA	0.205447	HarrPuro	PLA
HarrPuro_PLA	0.146556	HarrPuro	PLA
HarrPuro_PLA	0.244718	HarrPuro	PLA
HarrPuro_PLA	0.0877168	HarrPuro	PLA
HarrPuro_PLA	0.114217	HarrPuro	PLA
HarrPuro_PLA	0.102533	HarrPuro	PLA
HarrPuro_PLA	0.0389455	HarrPuro	PLA
HarrPuro_PLA	0.216703	HarrPuro	PLA
HarrPuro_PLA	0.136943	HarrPuro	PLA
HarrPuro_PLA	0.168824	HarrPuro	PLA
HarrPuro_PLA	0.167786	HarrPuro	PLA
HarrPuro_PLA	0.1328	HarrPuro	PLA
HarrPuro_PLA	0.157733	HarrPuro	PLA
HarrPuro_PLA	0.076508	HarrPuro	PLA
HarrPuro_PLA	0.0592794	HarrPuro	PLA
HarrPuro_PLA	0.092052	HarrPuro	PLA
HarrPuro_PLA	0.107517	HarrPuro	PLA
HarrPuro_PLA	0.109692	HarrPuro	PLA
HarrPuro_PLA	0.110219	HarrPuro	PLA
HarrPuro_PLA	0.0299703	HarrPuro	PLA
HarrPuro_PLA	0.0837393	HarrPuro	PLA
HarrPuro_PLA	0.0935413	HarrPuro	PLA
HarrPuro_PLA	0.10579	HarrPuro	PLA
HarrPuro_PLA	0.122095	HarrPuro	PLA
HarrPuro_PLA	0.134695	HarrPuro	PLA
HarrPuro_PLA	0.0846469	HarrPuro	PLA
HarrPuro_PLA	0.0936241	HarrPuro	PLA
HarrPuro_PLA	0.0739989	HarrPuro	PLA
HarrPuro_PLA	0.109125	HarrPuro	PLA
HarrPuro_PLA	0.229564	HarrPuro	PLA
HarrPuro_PLA	0.107771	HarrPuro	PLA
HarrPuro_PLA	0.173912	HarrPuro	PLA
HarrPuro_PLA	0.231351	HarrPuro	PLA
HarrPuro_PLA	0.108919	HarrPuro	PLA
HarrPuro_PLA	0.0558808	HarrPuro	PLA
HarrPuro_PLA	0.124331	HarrPuro	PLA
HarrPuro_PLA	0.0881493	HarrPuro	PLA
HarrPuro_PLA	0.0186958	HarrPuro	PLA
HarrPuro_PLA	0.0214652	HarrPuro	PLA
HarrPuro_PLA	0.088565	HarrPuro	PLA
HarrPuro_PLA	0.0962998	HarrPuro	PLA
HarrPuro_PLA	0.0774981	HarrPuro	PLA
HarrPuro_PLA	0.139553	HarrPuro	PLA
HarrPuro_PLA	0.0697495	HarrPuro	PLA
HarrPuro_PLA	0.138003	HarrPuro	PLA
HarrPuro_PLA	0.0234091	HarrPuro	PLA
HarrPuro_PLA	0.0450778	HarrPuro	PLA
HarrPuro_PLA	0.0922074	HarrPuro	PLA
HarrPuro_PLA	0.147639	HarrPuro	PLA
HarrPuro_PLA	0.0967782	HarrPuro	PLA
HarrPuro_PLA	0.0987933	HarrPuro	PLA
HarrPuro_PLA	0.0993766	HarrPuro	PLA
HarrPuro_PLA	0.12683	HarrPuro	PLA
HarrPuro_PLA	0.0930012	HarrPuro	PLA
HarrPuro_PLA	0.0466001	HarrPuro	PLA
HarrPuro_PLA	0.206716	HarrPuro	PLA
HarrPuro_PLA	0.156006	HarrPuro	PLA
HarrPuro_PLA	0.104149	HarrPuro	PLA
HarrPuro_PLA	0.110363	HarrPuro	PLA
HarrPuro_PLA	0.120229	HarrPuro	PLA
HarrPuro_PLA	0.139721	HarrPuro	PLA
HarrPuro_PLA	0.215623	HarrPuro	PLA
HarrPuro_PLA	0.0936053	HarrPuro	PLA
HarrPuro_PLA	0.0862196	HarrPuro	PLA
HarrPuro_PLA	0.0922506	HarrPuro	PLA
HarrPuro_PLA	0.0787337	HarrPuro	PLA
HarrPuro_PLA	0.11159	HarrPuro	PLA
HarrPuro_PLA	0.117863	HarrPuro	PLA
HarrPuro_PLA	0.0691025	HarrPuro	PLA
HarrPuro_PLA	0.210083	HarrPuro	PLA
HarrPuro_PLA	0.117323	HarrPuro	PLA
HarrPuro_PLA	0.154938	HarrPuro	PLA
HarrPuro_PLA	0.131484	HarrPuro	PLA
HarrPuro_PLA	0.0701959	HarrPuro	PLA
HarrPuro_PLA	0.0432932	HarrPuro	PLA
HarrPuro_PLA	0.0773209	HarrPuro	PLA
HarrPuro_PLA	0.105713	HarrPuro	PLA
HarrPuro_PLA	0.147796	HarrPuro	PLA
HarrPuro_PLA	0.0656753	HarrPuro	PLA
HarrPuro_PLA	0.0390861	HarrPuro	PLA
HarrPuro_PLA	0.115347	HarrPuro	PLA
HarrPuro_PLA	0.207626	HarrPuro	PLA
HarrPuro_PLA	0.0960903	HarrPuro	PLA
HarrPuro_PLA	0.127584	HarrPuro	PLA
HarrPuro_PLA	0.0880395	HarrPuro	PLA
HarrPuro_PLA	0.159555	HarrPuro	PLA
HarrPuro_PLA	0.0982368	HarrPuro	PLA
PuroWashHarr_IF		PuroWashHarr	IF
PuroWashHarr_IF		PuroWashHarr	IF
PuroWashHarr_IF		PuroWashHarr	IF
PuroWashHarr_IF		PuroWashHarr	IF
PuroWashHarr_IF		PuroWashHarr	IF
PuroWashHarr_IF		PuroWashHarr	IF
PuroWashHarr_IF		PuroWashHarr	IF
PuroWashHarr_IF		PuroWashHarr	IF
PuroWashHarr_IF		PuroWashHarr	IF
PuroWashHarr_IF		PuroWashHarr	IF
PuroWashHarr_IF		PuroWashHarr	IF
PuroWashHarr_IF		PuroWashHarr	IF
PuroWashHarr_IF		PuroWashHarr	IF
PuroWashHarr_IF		PuroWashHarr	IF
PuroWashHarr_IF		PuroWashHarr	IF
PuroWashHarr_IF		PuroWashHarr	IF
PuroWashHarr_IF		PuroWashHarr	IF
PuroWashHarr_IF		PuroWashHarr	IF
PuroWashHarr_IF		PuroWashHarr	IF
PuroWashHarr_IF		PuroWashHarr	IF
PuroWashHarr_IF		PuroWashHarr	IF
PuroWashHarr_IF		PuroWashHarr	IF
PuroWashHarr_IF		PuroWashHarr	IF
PuroWashHarr_IF		PuroWashHarr	IF
PuroWashHarr_IF		PuroWashHarr	IF
PuroWashHarr_IF		PuroWashHarr	IF
PuroWashHarr_IF		PuroWashHarr	IF
PuroWashHarr_IF		PuroWashHarr	IF
PuroWashHarr_IF		PuroWashHarr	IF
PuroWashHarr_IF		PuroWashHarr	IF
PuroWashHarr_IF		PuroWashHarr	IF
PuroWashHarr_IF		PuroWashHarr	IF
PuroWashHarr_IF		PuroWashHarr	IF
PuroWashHarr_IF		PuroWashHarr	IF
PuroWashHarr_IF		PuroWashHarr	IF
PuroWashHarr_IF		PuroWashHarr	IF
PuroWashHarr_IF		PuroWashHarr	IF
PuroWashHarr_IF		PuroWashHarr	IF
PuroWashHarr_IF		PuroWashHarr	IF
PuroWashHarr_IF		PuroWashHarr	IF
PuroWashHarr_IF		PuroWashHarr	IF
PuroWashHarr_IF		PuroWashHarr	IF
PuroWashHarr_IF		PuroWashHarr	IF
PuroWashHarr_IF		PuroWashHarr	IF
PuroWashHarr_IF		PuroWashHarr	IF
PuroWashHarr_IF		PuroWashHarr	IF
PuroWashHarr_IF		PuroWashHarr	IF
PuroWashHarr_IF		PuroWashHarr	IF
PuroWashHarr_IF		PuroWashHarr	IF
PuroWashHarr_IF		PuroWashHarr	IF
PuroWashHarr_IF		PuroWashHarr	IF
PuroWashHarr_IF		PuroWashHarr	IF
PuroWashHarr_IF		PuroWashHarr	IF
PuroWashHarr_IF		PuroWashHarr	IF
PuroWashHarr_IF		PuroWashHarr	IF
PuroWashHarr_IF		PuroWashHarr	IF
PuroWashHarr_IF		PuroWashHarr	IF
PuroWashHarr_IF		PuroWashHarr	IF
PuroWashHarr_IF		PuroWashHarr	IF
PuroWashHarr_IF		PuroWashHarr	IF
PuroWashHarr_IF		PuroWashHarr	IF
PuroWashHarr_IF		PuroWashHarr	IF
PuroWashHarr_IF		PuroWashHarr	IF
PuroWashHarr_IF		PuroWashHarr	IF
PuroWashHarr_IF		PuroWashHarr	IF
PuroWashHarr_IF		PuroWashHarr	IF
PuroWashHarr_IF		PuroWashHarr	IF
PuroWashHarr_IF		PuroWashHarr	IF
PuroWashHarr_IF		PuroWashHarr	IF
PuroWashHarr_IF		PuroWashHarr	IF
PuroWashHarr_IF		PuroWashHarr	IF
PuroWashHarr_IF		PuroWashHarr	IF
PuroWashHarr_IF		PuroWashHarr	IF
PuroWashHarr_IF		PuroWashHarr	IF
PuroWashHarr_IF		PuroWashHarr	IF
PuroWashHarr_IF		PuroWashHarr	IF
PuroWashHarr_IF		PuroWashHarr	IF
PuroWashHarr_IF		PuroWashHarr	IF
PuroWashHarr_IF		PuroWashHarr	IF
PuroWashHarr_IF		PuroWashHarr	IF
PuroWashHarr_IF		PuroWashHarr	IF
PuroWashHarr_IF		PuroWashHarr	IF
PuroWashHarr_IF		PuroWashHarr	IF
PuroWashHarr_IF		PuroWashHarr	IF
PuroWashHarr_IF		PuroWashHarr	IF
PuroWashHarr_IF		PuroWashHarr	IF
PuroWashHarr_IF		PuroWashHarr	IF
PuroWashHarr_IF		PuroWashHarr	IF
PuroWashHarr_IF		PuroWashHarr	IF
PuroWashHarr_IF		PuroWashHarr	IF
PuroWashHarr_IF		PuroWashHarr	IF
PuroWashHarr_IF		PuroWashHarr	IF
PuroWashHarr_IF		PuroWashHarr	IF
PuroWashHarr_IF		PuroWashHarr	IF
PuroWashHarr_IF		PuroWashHarr	IF
PuroWashHarr_IF		PuroWashHarr	IF
PuroWashHarr_IF	1.35853	PuroWashHarr	IF
PuroWashHarr_IF	1.68293	PuroWashHarr	IF
PuroWashHarr_IF	0.590088	PuroWashHarr	IF
PuroWashHarr_IF	0.616368	PuroWashHarr	IF
PuroWashHarr_IF	0.798792	PuroWashHarr	IF
PuroWashHarr_IF	0.655244	PuroWashHarr	IF
PuroWashHarr_IF	0.753015	PuroWashHarr	IF
PuroWashHarr_IF	0.653838	PuroWashHarr	IF
PuroWashHarr_IF	1.02147	PuroWashHarr	IF
PuroWashHarr_IF	0.448706	PuroWashHarr	IF
PuroWashHarr_IF	0.374393	PuroWashHarr	IF
PuroWashHarr_IF	0.636902	PuroWashHarr	IF
PuroWashHarr_IF	0.837433	PuroWashHarr	IF
PuroWashHarr_IF	0.844838	PuroWashHarr	IF
PuroWashHarr_IF	0.69322	PuroWashHarr	IF
PuroWashHarr_IF	0.457401	PuroWashHarr	IF
PuroWashHarr_IF	0.679263	PuroWashHarr	IF
PuroWashHarr_IF	0.570127	PuroWashHarr	IF
PuroWashHarr_IF	0.578451	PuroWashHarr	IF
PuroWashHarr_IF	0.510003	PuroWashHarr	IF
PuroWashHarr_IF	0.863013	PuroWashHarr	IF
PuroWashHarr_IF	0.688355	PuroWashHarr	IF
PuroWashHarr_IF	0.624304	PuroWashHarr	IF
PuroWashHarr_IF	0.730558	PuroWashHarr	IF
PuroWashHarr_IF	1.061	PuroWashHarr	IF
PuroWashHarr_IF	1.01699	PuroWashHarr	IF
PuroWashHarr_IF	0.531546	PuroWashHarr	IF
PuroWashHarr_IF	0.528521	PuroWashHarr	IF
PuroWashHarr_IF	0.808566	PuroWashHarr	IF
PuroWashHarr_IF	0.917807	PuroWashHarr	IF
PuroWashHarr_IF	1.24807	PuroWashHarr	IF
PuroWashHarr_IF	0.637062	PuroWashHarr	IF
PuroWashHarr_IF	0.975647	PuroWashHarr	IF
PuroWashHarr_IF	0.453588	PuroWashHarr	IF
PuroWashHarr_IF	0.800396	PuroWashHarr	IF
PuroWashHarr_IF	1.73674	PuroWashHarr	IF
PuroWashHarr_IF	0.470317	PuroWashHarr	IF
PuroWashHarr_IF	0.746251	PuroWashHarr	IF
PuroWashHarr_IF	0.873601	PuroWashHarr	IF
PuroWashHarr_IF	1.31811	PuroWashHarr	IF
PuroWashHarr_IF	0.583231	PuroWashHarr	IF
PuroWashHarr_IF	0.480114	PuroWashHarr	IF
PuroWashHarr_IF	1.26796	PuroWashHarr	IF
PuroWashHarr_IF	0.915346	PuroWashHarr	IF
PuroWashHarr_IF	0.725264	PuroWashHarr	IF
PuroWashHarr_IF	1.84425	PuroWashHarr	IF
PuroWashHarr_IF	0.656153	PuroWashHarr	IF
PuroWashHarr_IF	0.626355	PuroWashHarr	IF
PuroWashHarr_IF	0.64743	PuroWashHarr	IF
PuroWashHarr_IF	1.31811	PuroWashHarr	IF
PuroWashHarr_IF	1.17109	PuroWashHarr	IF
PuroWashHarr_IF	0.838959	PuroWashHarr	IF
PuroWashHarr_IF	0.755775	PuroWashHarr	IF
PuroWashHarr_IF	1.19097	PuroWashHarr	IF
PuroWashHarr_IF	0.873192	PuroWashHarr	IF
PuroWashHarr_IF	1.31287	PuroWashHarr	IF
PuroWashHarr_IF	0.759766	PuroWashHarr	IF
PuroWashHarr_IF	0.963624	PuroWashHarr	IF
PuroWashHarr_IF	0.945808	PuroWashHarr	IF
PuroWashHarr_IF	1.09638	PuroWashHarr	IF
PuroWashHarr_IF	0.580885	PuroWashHarr	IF
PuroWashHarr_IF	0.997284	PuroWashHarr	IF
PuroWashHarr_IF	0.693755	PuroWashHarr	IF
PuroWashHarr_IF	1.29519	PuroWashHarr	IF
PuroWashHarr_IF	0.569021	PuroWashHarr	IF
PuroWashHarr_IF	0.673496	PuroWashHarr	IF
PuroWashHarr_IF	0.636773	PuroWashHarr	IF
PuroWashHarr_IF	0.779485	PuroWashHarr	IF
PuroWashHarr_IF	0.700911	PuroWashHarr	IF
PuroWashHarr_IF	0.143741	PuroWashHarr	IF
PuroWashHarr_IF	0.51198	PuroWashHarr	IF
PuroWashHarr_IF	0.480088	PuroWashHarr	IF
PuroWashHarr_IF	0.595665	PuroWashHarr	IF
PuroWashHarr_IF	0.850502	PuroWashHarr	IF
PuroWashHarr_IF	1.00322	PuroWashHarr	IF
PuroWashHarr_IF	0.812898	PuroWashHarr	IF
PuroWashHarr_IF	0.792061	PuroWashHarr	IF
PuroWashHarr_IF	0.272047	PuroWashHarr	IF
PuroWashHarr_IF	0.468746	PuroWashHarr	IF
PuroWashHarr_IF	0.574673	PuroWashHarr	IF
PuroWashHarr_IF	1.32738	PuroWashHarr	IF
PuroWashHarr_IF	0.477017	PuroWashHarr	IF
PuroWashHarr_IF	0.59477	PuroWashHarr	IF
PuroWashHarr_IF	1.62245	PuroWashHarr	IF
PuroWashHarr_IF	0.472162	PuroWashHarr	IF
PuroWashHarr_IF	0.621773	PuroWashHarr	IF
PuroWashHarr_IF	0.56565	PuroWashHarr	IF
PuroWashHarr_IF	0.491396	PuroWashHarr	IF
PuroWashHarr_IF	0.561061	PuroWashHarr	IF
PuroWashHarr_IF	1.5303	PuroWashHarr	IF
PuroWashHarr_IF	0.909393	PuroWashHarr	IF
PuroWashHarr_IF	0.870929	PuroWashHarr	IF
PuroWashHarr_IF	0.648952	PuroWashHarr	IF
PuroWashHarr_IF	0.688318	PuroWashHarr	IF
PuroWashHarr_IF	0.636807	PuroWashHarr	IF
PuroWashHarr_IF	0.105622	PuroWashHarr	IF
PuroWashHarr_PLA		PuroWashHarr	PLA
PuroWashHarr_PLA		PuroWashHarr	PLA
PuroWashHarr_PLA		PuroWashHarr	PLA
PuroWashHarr_PLA		PuroWashHarr	PLA
PuroWashHarr_PLA		PuroWashHarr	PLA
PuroWashHarr_PLA		PuroWashHarr	PLA
PuroWashHarr_PLA		PuroWashHarr	PLA
PuroWashHarr_PLA		PuroWashHarr	PLA
PuroWashHarr_PLA		PuroWashHarr	PLA
PuroWashHarr_PLA		PuroWashHarr	PLA
PuroWashHarr_PLA		PuroWashHarr	PLA
PuroWashHarr_PLA		PuroWashHarr	PLA
PuroWashHarr_PLA		PuroWashHarr	PLA
PuroWashHarr_PLA		PuroWashHarr	PLA
PuroWashHarr_PLA		PuroWashHarr	PLA
PuroWashHarr_PLA		PuroWashHarr	PLA
PuroWashHarr_PLA		PuroWashHarr	PLA
PuroWashHarr_PLA		PuroWashHarr	PLA
PuroWashHarr_PLA		PuroWashHarr	PLA
PuroWashHarr_PLA		PuroWashHarr	PLA
PuroWashHarr_PLA		PuroWashHarr	PLA
PuroWashHarr_PLA		PuroWashHarr	PLA
PuroWashHarr_PLA		PuroWashHarr	PLA
PuroWashHarr_PLA		PuroWashHarr	PLA
PuroWashHarr_PLA		PuroWashHarr	PLA
PuroWashHarr_PLA		PuroWashHarr	PLA
PuroWashHarr_PLA		PuroWashHarr	PLA
PuroWashHarr_PLA		PuroWashHarr	PLA
PuroWashHarr_PLA		PuroWashHarr	PLA
PuroWashHarr_PLA		PuroWashHarr	PLA
PuroWashHarr_PLA		PuroWashHarr	PLA
PuroWashHarr_PLA		PuroWashHarr	PLA
PuroWashHarr_PLA		PuroWashHarr	PLA
PuroWashHarr_PLA		PuroWashHarr	PLA
PuroWashHarr_PLA		PuroWashHarr	PLA
PuroWashHarr_PLA		PuroWashHarr	PLA
PuroWashHarr_PLA		PuroWashHarr	PLA
PuroWashHarr_PLA		PuroWashHarr	PLA
PuroWashHarr_PLA		PuroWashHarr	PLA
PuroWashHarr_PLA		PuroWashHarr	PLA
PuroWashHarr_PLA		PuroWashHarr	PLA
PuroWashHarr_PLA		PuroWashHarr	PLA
PuroWashHarr_PLA		PuroWashHarr	PLA
PuroWashHarr_PLA		PuroWashHarr	PLA
PuroWashHarr_PLA		PuroWashHarr	PLA
PuroWashHarr_PLA		PuroWashHarr	PLA
PuroWashHarr_PLA		PuroWashHarr	PLA
PuroWashHarr_PLA		PuroWashHarr	PLA
PuroWashHarr_PLA		PuroWashHarr	PLA
PuroWashHarr_PLA		PuroWashHarr	PLA
PuroWashHarr_PLA		PuroWashHarr	PLA
PuroWashHarr_PLA		PuroWashHarr	PLA
PuroWashHarr_PLA		PuroWashHarr	PLA
PuroWashHarr_PLA		PuroWashHarr	PLA
PuroWashHarr_PLA		PuroWashHarr	PLA
PuroWashHarr_PLA		PuroWashHarr	PLA
PuroWashHarr_PLA		PuroWashHarr	PLA
PuroWashHarr_PLA		PuroWashHarr	PLA
PuroWashHarr_PLA		PuroWashHarr	PLA
PuroWashHarr_PLA		PuroWashHarr	PLA
PuroWashHarr_PLA		PuroWashHarr	PLA
PuroWashHarr_PLA		PuroWashHarr	PLA
PuroWashHarr_PLA		PuroWashHarr	PLA
PuroWashHarr_PLA		PuroWashHarr	PLA
PuroWashHarr_PLA		PuroWashHarr	PLA
PuroWashHarr_PLA		PuroWashHarr	PLA
PuroWashHarr_PLA		PuroWashHarr	PLA
PuroWashHarr_PLA		PuroWashHarr	PLA
PuroWashHarr_PLA		PuroWashHarr	PLA
PuroWashHarr_PLA		PuroWashHarr	PLA
PuroWashHarr_PLA		PuroWashHarr	PLA
PuroWashHarr_PLA		PuroWashHarr	PLA
PuroWashHarr_PLA		PuroWashHarr	PLA
PuroWashHarr_PLA		PuroWashHarr	PLA
PuroWashHarr_PLA		PuroWashHarr	PLA
PuroWashHarr_PLA		PuroWashHarr	PLA
PuroWashHarr_PLA		PuroWashHarr	PLA
PuroWashHarr_PLA		PuroWashHarr	PLA
PuroWashHarr_PLA		PuroWashHarr	PLA
PuroWashHarr_PLA		PuroWashHarr	PLA
PuroWashHarr_PLA		PuroWashHarr	PLA
PuroWashHarr_PLA		PuroWashHarr	PLA
PuroWashHarr_PLA		PuroWashHarr	PLA
PuroWashHarr_PLA		PuroWashHarr	PLA
PuroWashHarr_PLA		PuroWashHarr	PLA
PuroWashHarr_PLA		PuroWashHarr	PLA
PuroWashHarr_PLA		PuroWashHarr	PLA
PuroWashHarr_PLA		PuroWashHarr	PLA
PuroWashHarr_PLA		PuroWashHarr	PLA
PuroWashHarr_PLA		PuroWashHarr	PLA
PuroWashHarr_PLA		PuroWashHarr	PLA
PuroWashHarr_PLA		PuroWashHarr	PLA
PuroWashHarr_PLA		PuroWashHarr	PLA
PuroWashHarr_PLA		PuroWashHarr	PLA
PuroWashHarr_PLA		PuroWashHarr	PLA
PuroWashHarr_PLA		PuroWashHarr	PLA
PuroWashHarr_PLA	0.541704	PuroWashHarr	PLA
PuroWashHarr_PLA	0.412544	PuroWashHarr	PLA
PuroWashHarr_PLA	0.387471	PuroWashHarr	PLA
PuroWashHarr_PLA	0.185305	PuroWashHarr	PLA
PuroWashHarr_PLA	0.635156	PuroWashHarr	PLA
PuroWashHarr_PLA	0.152239	PuroWashHarr	PLA
PuroWashHarr_PLA	0.368422	PuroWashHarr	PLA
PuroWashHarr_PLA	0.214254	PuroWashHarr	PLA
PuroWashHarr_PLA	0.420637	PuroWashHarr	PLA
PuroWashHarr_PLA	0.416606	PuroWashHarr	PLA
PuroWashHarr_PLA	0.855649	PuroWashHarr	PLA
PuroWashHarr_PLA	0.435668	PuroWashHarr	PLA
PuroWashHarr_PLA	0.341812	PuroWashHarr	PLA
PuroWashHarr_PLA	0.365788	PuroWashHarr	PLA
PuroWashHarr_PLA	0.713892	PuroWashHarr	PLA
PuroWashHarr_PLA	0.29554	PuroWashHarr	PLA
PuroWashHarr_PLA	0.500758	PuroWashHarr	PLA
PuroWashHarr_PLA	0.798595	PuroWashHarr	PLA
PuroWashHarr_PLA	0.21498	PuroWashHarr	PLA
PuroWashHarr_PLA	1.02607	PuroWashHarr	PLA
PuroWashHarr_PLA	0.626274	PuroWashHarr	PLA
PuroWashHarr_PLA	0.331481	PuroWashHarr	PLA
PuroWashHarr_PLA	0.437138	PuroWashHarr	PLA
PuroWashHarr_PLA	0.423325	PuroWashHarr	PLA
PuroWashHarr_PLA	0.188482	PuroWashHarr	PLA
PuroWashHarr_PLA	0.2985	PuroWashHarr	PLA
PuroWashHarr_PLA	0.444783	PuroWashHarr	PLA
PuroWashHarr_PLA	0.548745	PuroWashHarr	PLA
PuroWashHarr_PLA	0.375071	PuroWashHarr	PLA
PuroWashHarr_PLA	0.311781	PuroWashHarr	PLA
PuroWashHarr_PLA	0.535778	PuroWashHarr	PLA
PuroWashHarr_PLA	0.591167	PuroWashHarr	PLA
PuroWashHarr_PLA	0.374993	PuroWashHarr	PLA
PuroWashHarr_PLA	0.431071	PuroWashHarr	PLA
PuroWashHarr_PLA	0.367962	PuroWashHarr	PLA
PuroWashHarr_PLA	0.671282	PuroWashHarr	PLA
PuroWashHarr_PLA	1.05446	PuroWashHarr	PLA
PuroWashHarr_PLA	0.303593	PuroWashHarr	PLA
PuroWashHarr_PLA	0.276865	PuroWashHarr	PLA
PuroWashHarr_PLA	0.978003	PuroWashHarr	PLA
PuroWashHarr_PLA	0.379848	PuroWashHarr	PLA
PuroWashHarr_PLA	0.693942	PuroWashHarr	PLA
PuroWashHarr_PLA	0.373949	PuroWashHarr	PLA
PuroWashHarr_PLA	0.542789	PuroWashHarr	PLA
PuroWashHarr_PLA	0.60426	PuroWashHarr	PLA
PuroWashHarr_PLA	0.358425	PuroWashHarr	PLA
PuroWashHarr_PLA	1.58885	PuroWashHarr	PLA
PuroWashHarr_PLA	0.535496	PuroWashHarr	PLA
PuroWashHarr_PLA	0.960239	PuroWashHarr	PLA
PuroWashHarr_PLA	0.245351	PuroWashHarr	PLA
PuroWashHarr_PLA	1.00563	PuroWashHarr	PLA
PuroWashHarr_PLA	0.627525	PuroWashHarr	PLA
PuroWashHarr_PLA	0.255828	PuroWashHarr	PLA
PuroWashHarr_PLA	0.500361	PuroWashHarr	PLA
PuroWashHarr_PLA	0.733938	PuroWashHarr	PLA
PuroWashHarr_PLA	0.812451	PuroWashHarr	PLA
PuroWashHarr_PLA	0.380859	PuroWashHarr	PLA
PuroWashHarr_PLA	0.733145	PuroWashHarr	PLA
PuroWashHarr_PLA	1.12733	PuroWashHarr	PLA
PuroWashHarr_PLA	0.874312	PuroWashHarr	PLA
PuroWashHarr_PLA	0.389836	PuroWashHarr	PLA
PuroWashHarr_PLA	0.611494	PuroWashHarr	PLA
PuroWashHarr_PLA	0.913875	PuroWashHarr	PLA
PuroWashHarr_PLA	0.558106	PuroWashHarr	PLA
PuroWashHarr_PLA	0.703923	PuroWashHarr	PLA
PuroWashHarr_PLA	0.923724	PuroWashHarr	PLA
PuroWashHarr_PLA	0.651772	PuroWashHarr	PLA
PuroWashHarr_PLA	0.698115	PuroWashHarr	PLA
PuroWashHarr_PLA	0.309305	PuroWashHarr	PLA
PuroWashHarr_PLA	0.509797	PuroWashHarr	PLA
PuroWashHarr_PLA	0.603434	PuroWashHarr	PLA
PuroWashHarr_PLA	1.29192	PuroWashHarr	PLA
PuroWashHarr_PLA	0.849683	PuroWashHarr	PLA
PuroWashHarr_PLA	0.706881	PuroWashHarr	PLA
PuroWashHarr_PLA	0.353139	PuroWashHarr	PLA
PuroWashHarr_PLA	0.988007	PuroWashHarr	PLA
PuroWashHarr_PLA	1.8631	PuroWashHarr	PLA
PuroWashHarr_PLA	0.690363	PuroWashHarr	PLA
PuroWashHarr_PLA	0.669676	PuroWashHarr	PLA
PuroWashHarr_PLA	1.86376	PuroWashHarr	PLA
PuroWashHarr_PLA	1.43888	PuroWashHarr	PLA
PuroWashHarr_PLA	1.0237	PuroWashHarr	PLA
PuroWashHarr_PLA	0.558911	PuroWashHarr	PLA
PuroWashHarr_PLA	0.39503	PuroWashHarr	PLA
PuroWashHarr_PLA	0.479705	PuroWashHarr	PLA
PuroWashHarr_PLA	1.47546	PuroWashHarr	PLA
PuroWashHarr_PLA	0.766938	PuroWashHarr	PLA
PuroWashHarr_PLA	0.844771	PuroWashHarr	PLA
PuroWashHarr_PLA	0.6381	PuroWashHarr	PLA
PuroWashHarr_PLA	0.705577	PuroWashHarr	PLA
PuroWashHarr_PLA	0.899947	PuroWashHarr	PLA
PuroWashHarr_PLA	0.651581	PuroWashHarr	PLA
PuroWashHarr_PLA	0.729063	PuroWashHarr	PLA
PuroWashHarr_PLA	0.840597	PuroWashHarr	PLA
PuroWashHarr_PLA	0.84725	PuroWashHarr	PLA
PuroWashHarr_PLA	0.846927	PuroWashHarr	PLA
