# Supplementary material for: Elongation inhibitors do not prevent the release of puromycylated nascent polypeptide chains from ribosomes
Source: eLife journal article supplement (doi:10.7554/elife.60048), 2020-08-26

## Fig2A Blots

Emt + Puro

Rb anti-S6 / Ms anti-HA

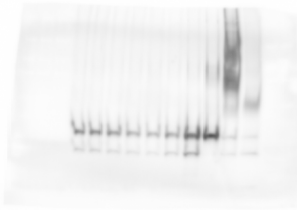

1st probes

## Fig2B Blots

Chx + Puro

Ms anti-Puro

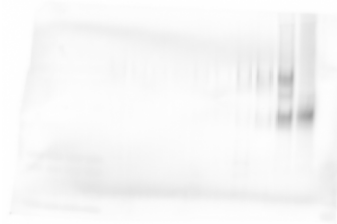

Ms anti-Puro

2nd probes

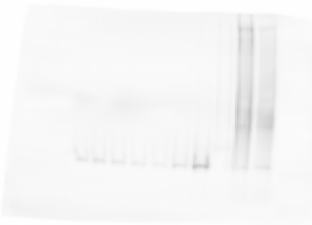

Rb anti-S6 / Ms anti-HA

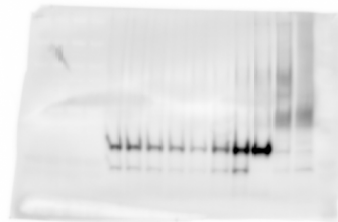

## Fig2C Blots

Ms anti-HA

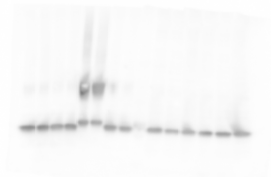

Rb anti-S6

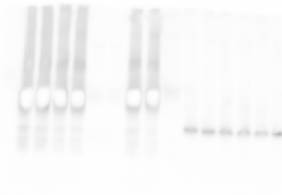

lower exposure

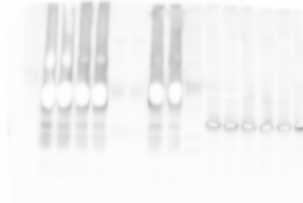

higher exposure

Ms anti-Puro

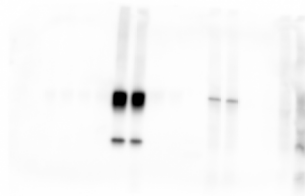

Supplement: supp [file elife-60048-supp-v1.zip › elife_poa_e60048_Figure_2_source_data_1.pdf]
