# Supplementary material for: Elongation inhibitors do not prevent the release of puromycylated nascent polypeptide chains from ribosomes
Source: eLife journal article supplement (doi:10.7554/elife.60048), 2020-08-26
Supplement: supp [file elife-60048-supp-v1.zip › elife_poa_e60048_Figure_2_source_data_2.xlsx]

## Sheet: Figure 2 - figure supplement 1A
CellPre_CellTx_LysateTx	Veh_Puro_Veh	Emt_Puro_Veh	Veh_Veh_Veh	Emt_Veh_Veh	Veh_Veh_Puro	Emt_Veh_Puro
RNA_conc_pg_uL	209	308	194	273	213	323
rRNA_ratio	2.7	2.5	2.61	2.31	2.59	2.29
