# Supplementary material for: Elongation inhibitors do not prevent the release of puromycylated nascent polypeptide chains from ribosomes
Source: eLife journal article supplement (doi:10.7554/elife.60048), 2020-08-26
Supplement: supp [file elife-60048-supp-v1.zip › elife_poa_e60048_Figure_3_source_data_1.xlsx]

## Sheet: Figure3C
Frame	Series	Time	Puncta	ROI_Intensity	Drug	Rep	Smooth	TimeBin	TimeMed
4	6	0.0414856	1.33071	1.00396	CHX-Puro	1	1.33071	1	2.60504
3	3	0.0561485	0.857143	1.00634	Puro	3	0.857143	1	2.60504
2	10	0.161898	0.934256	0.996323	EMT-Puro	4	0.934256	1	2.60504
1	1	0.193342	1.76842	1.03607	NoPuro	1	1.76842	1	2.60504
1	2	0.248255	1.04348	1.01205	Puro	2	1.04348	1	2.60504
8	2	0.312311	0.989247	0.995197	EMT-Puro	1	0.989247	1	2.60504
4	7	0.437435	1.10976	0.988931	CHX-Puro	1	1.22023	1	2.60504
3	2	0.455707	1.38462	1.01076	CHX-Puro	3	1.38462	1	2.60504
3	4	0.468652	1.07907	1.02976	Puro	3	0.968106	1	2.60504
2	3	0.473858	0.980892	0.988475	CHX-Puro	2	0.980892	1	2.60504
1	2	0.476479	1.24064	1.05518	NoPuro	1	1.50453	1	2.60504
8	3	0.588591	1.08747	0.992795	EMT-Puro	1	1.03836	1	2.60504
1	3.1	0.753937	1.23077	1.03367	NoPuro	1	1.41328	1	2.60504
1	3.2	0.753937	1.67686	1.04233	NoPuro	1	1.47917	1	2.60504
1	1	0.866211	1.50943	1.12921	NoPuro	3	1.50943	1	2.60504
3	3	0.875685	0.553846	1.00118	CHX-Puro	3	0.969231	1	2.60504
8	4	0.876161	0.993827	0.999258	EMT-Puro	1	1.02351	1	2.60504
3	5	0.931295	1	0.990817	Puro	3	0.978738	1	2.60504
1	4	1.0072	0.833684	1.02259	NoPuro	1	1.35007	1	2.60504
4	8	1.05563	1.3	1.00019	CHX-Puro	1	1.24682	1	2.60504
1	1	1.05801	1.38889	1.06766	NoPuro	2	1.38889	1	2.60504
8	5	1.16045	0.819178	1.00908	EMT-Puro	1	0.972431	1	2.60504
2	11	1.16159	1.13636	1.00121	EMT-Puro	4	1.03531	1	2.60504
3	2.2	1.22251	1.02767	0.983415	EMT-Puro	2	1.02767	1	2.60504
3	2.1	1.22251	0.853659	0.998976	EMT-Puro	2	0.940663	1	2.60504
1	2	1.24669	1.67598	1.04306	NoPuro	3	1.59271	1	2.60504
3	4	1.26574	0.95625	1.01627	CHX-Puro	3	0.964904	1	2.60504
1	5	1.2777	1.26316	1.01638	NoPuro	1	1.33559	1	2.60504
2	4	1.2997	1.3388	1.00068	CHX-Puro	2	1.15984	1	2.60504
3	6	1.41172	0.888889	0.980614	Puro	3	0.956275	1	2.60504
8	6	1.45008	1.11667	1.0052	EMT-Puro	1	1.00128	1	2.60504
4	9	1.46053	0.700599	1.0011	CHX-Puro	1	1.11027	1	2.60504
1	6	1.54169	1.08562	1.0673	NoPuro	1	1.29988	1	2.60504
3	3.2	1.60451	1.16592	1.00287	EMT-Puro	2	1.01575	1	2.60504
3	3.1	1.60451	0.782123	0.996855	EMT-Puro	2	0.957342	1	2.60504
2	9	1.61904	1.03226	0.999979	EMT-Puro	3	1.03226	1	2.60504
3	5	1.66269	0.86747	1.00119	CHX-Puro	3	0.940545	1	2.60504
2	5	1.6876	1.29126	1.02604	CHX-Puro	2	1.20365	1	2.60504
8	7	1.70615	0.766667	1.00432	EMT-Puro	1	0.962176	1	2.60504
1	7	1.80985	1.67442	1.0582	NoPuro	1	1.3467	1	2.60504
3	7	1.81984	1.6	1.02158	Puro	3	1.08502	1	2.60504
5	1	1.84055	1.33333	1.00367	CHX-Puro	1	1.15488	1	2.60504
1	2	1.96066	1.01198	1.0155	NoPuro	2	1.20043	1	2.60504
8	8	1.96772	0.938776	1.00752	EMT-Puro	1	0.958833	1	2.60504
3	4	1.99513	1.97561	1.0154	EMT-Puro	2	1.161	1	2.60504
1	4	2.06276	0.994083	1.0443	NoPuro	3	1.39316	1	2.60504
1	8.2	2.08135	0.277457	1.01211	NoPuro	1	1.22789	1	2.60504
1	8.1	2.08135	1.25338	1.03408	NoPuro	1	1.23044	1	2.60504
3	6	2.09127	0.615385	0.994572	CHX-Puro	3	0.875513	1	2.60504
2	6	2.11563	0.890909	1.00292	CHX-Puro	2	1.12547	1	2.60504
5	2	2.23114	1.24294	0.997804	CHX-Puro	1	1.16956	1	2.60504
8	9	2.25379	1.49351	0.998908	EMT-Puro	1	1.02567	1	2.60504
3	8	2.30233	1.0303	1.01001	Puro	3	1.0759	1	2.60504
3	1.2	2.32251	0.670213	1.02388	EMT-Puro	4	0.913309	1	2.60504
3	1.1	2.32251	1.18286	0.993995	EMT-Puro	4	1.08449	1	2.60504
3	1.3	2.32251	0.642857	0.982546	EMT-Puro	4	0.974083	1	2.60504
1	3	2.34906	1.08333	1.02865	NoPuro	2	1.1614	1	2.60504
1	9	2.38927	1.31868	1.02013	NoPuro	1	1.18547	1	2.60504
3	5	2.39861	0.957447	1.00676	EMT-Puro	2	1.12707	1	2.60504
2	11	2.40778	0.712329	1.01196	EMT-Puro	3	0.872293	1	2.60504
1	5	2.47144	0.988235	1.01565	NoPuro	3	1.29193	1	2.60504
3	7.2	2.4968	1.07609	0.992003	CHX-Puro	3	0.908942	1	2.60504
3	7.1	2.4968	0.209302	0.999934	CHX-Puro	3	0.808994	1	2.60504
2	1	2.71328	0.631579	1.01095	NoPuro	1	1.12456	1	2.60504
2	12	2.78346	0.966038	1.00748	EMT-Puro	3	0.903542	1	2.60504
3	8	2.88205	1.24138	1.00571	CHX-Puro	3	0.863042	1	2.60504
9	2	2.91759	0.247312	1.0048	EMT-Puro	1	0.939183	1	2.60504
1	4	2.93096	1.23045	1.03544	NoPuro	2	1.17866	1	2.60504
2	2	2.98426	1.06952	1.01549	NoPuro	1	1.10844	1	2.60504
5	4	3.02088	1.1497	0.984677	CHX-Puro	1	1.16672	1	2.60504
1	1	3.10158	1.06061	1.01134	Puro	1	1.06061	1	2.60504
3	3	3.12386	0.857143	1.00233	EMT-Puro	4	0.903948	1	2.60504
1	4	3.13261	1.41176	1.04324	Puro	2	1.22762	1	2.60504
2	13	3.17192	1.26829	0.987249	EMT-Puro	3	0.994729	1	2.60504
9	3	3.19131	1.08747	1.0072	EMT-Puro	1	0.954012	1	2.60504
3	9	3.21819	1.01266	0.997412	Puro	3	1.06687	1	2.60504
1	6	3.23783	1.06931	1.02302	NoPuro	3	1.24741	1	2.60504
2	3.2	3.24627	1.36245	1.01576	NoPuro	1	1.06542	1	2.60504
2	3.1	3.24627	0.717949	1.00645	NoPuro	1	1.01255	1	2.60504
3	9	3.28645	0.970588	1.00962	CHX-Puro	3	0.874991	1	2.60504
1	5	3.3562	1.07143	1.00651	NoPuro	2	1.15722	1	2.60504
9	4	3.47878	0.993827	1.00074	EMT-Puro	1	0.95447	1	2.60504
2	4	3.49165	0.909474	1.00854	NoPuro	1	1.03005	1	2.60504
1	2	3.53821	1.03226	1.01617	Puro	1	1.04643	1	2.60504
2	7	3.57443	0.833333	0.982271	CHX-Puro	2	1.06704	1	2.60504
3	10	3.59858	0.657534	1.02982	Puro	3	1.0157	1	2.60504
1	5	3.6097	1.34483	1.06041	Puro	2	1.26669	1	2.60504
3	7	3.60985	1.8	0.996242	EMT-Puro	2	1.2232	1	2.60504
3	1	3.65803	1.05459	1.01836	EMT-Puro	3	1.0067	1	2.60504
3	10	3.6611	0.873786	1.16382	CHX-Puro	3	0.874871	1	2.60504
9	5	3.76898	1.19726	0.990922	EMT-Puro	1	0.965449	1	2.60504
2	5	3.77016	0.947368	1.01217	NoPuro	1	1.01623	1	2.60504
1	6	3.79637	0.949153	1.0444	NoPuro	2	1.12254	1	2.60504
3	5	3.91244	1.13143	0.993297	EMT-Puro	4	0.936445	1	2.60504
1	3	3.9513	0.566038	1.00591	Puro	1	0.886301	1	2.60504
3	8	3.99081	0.830769	0.999482	EMT-Puro	2	1.17415	1	2.60504
3	11	3.99612	1.01149	1.00565	Puro	3	1.01523	1	2.60504
2	6	4.03537	0.891761	1.00569	NoPuro	1	0.937962	1	2.60504
9	6	4.05013	0.916667	0.994798	EMT-Puro	1	0.957733	1	2.60504
1	6	4.05049	1.04348	1.03432	Puro	2	1.21089	1	2.60504
3	2	4.05519	1.07143	1.00832	EMT-Puro	3	1.01749	1	2.60504
2	8	4.16738	1.14379	1.0105	CHX-Puro	2	1.07983	1	2.60504
1	7	4.24143	1.52381	1.02967	NoPuro	2	1.17986	1	2.60504
1	7	4.24533	1.44262	1.00179	NoPuro	3	1.27994	1	2.60504
9	7	4.29013	1.15	0.995677	EMT-Puro	1	0.990815	1	2.60504
3	6	4.30301	0.6	1.00054	EMT-Puro	4	0.89439	1	2.60504
2	7	4.30486	0.781395	1.02661	NoPuro	1	0.988356	1	2.60504
3	9.1	4.41305	0.954545	0.994194	EMT-Puro	2	1.12608	1	2.60504
3	9.2	4.41305	0.913043	1.00089	EMT-Puro	2	1.14514	1	2.60504
3	3	4.4891	0.861538	0.997714	EMT-Puro	3	0.99521	1	2.60504
1	7	4.49173	0.736842	1.01982	Puro	2	1.11608	1	2.60504
2	9	4.55103	1	1.01063	CHX-Puro	2	1.06843	1	2.60504
9	8	4.56009	0.657143	0.992476	EMT-Puro	1	0.944863	1	2.60504
2	8.1	4.58643	1.0677	1.02062	NoPuro	1	0.948902	1	2.60504
2	8.2	4.58643	1.10983	1.00945	NoPuro	1	0.974	1	2.60504
5	6	4.59626	1.33071	1.0013	CHX-Puro	1	1.18722	1	2.60504
1	8	4.6551	1.15789	1.01413	NoPuro	3	1.26251	1	2.60504
4	1	4.739	0.5	1.00959	Puro	3	0.963709	1	2.60504
9	9	4.85295	0.896104	1.00109	EMT-Puro	1	0.957807	1	2.60504
2	9	4.87665	1.281	1.00605	NoPuro	1	1.01384	1	2.60504
3	4	4.88129	1.1413	1.00167	EMT-Puro	3	1.01347	1	2.60504
1	8	4.92507	1.57377	1.02582	Puro	2	1.19236	1	2.60504
2	10	4.9812	0.479452	1.01151	CHX-Puro	2	0.994805	1	2.60504
4	2	4.99111	0.989011	0.984556	CHX-Puro	3	0.83531	1	2.60504
1	4	4.99797	0.955414	0.997172	Puro	1	0.903579	1	2.60504
5	7	4.9988	1.26829	1.00335	CHX-Puro	1	1.19623	1	2.60504
1	9	5.07179	1.09562	1.00998	NoPuro	3	1.24165	2	7.3717
4	2	5.11305	0.583333	1.00264	Puro	3	0.936328	2	7.3717
3	1	5.19467	0.884211	0.999693	NoPuro	1	0.995313	2	7.3717
3	8	5.19811	1.02273	0.999654	EMT-Puro	4	0.908649	2	7.3717
3	10	5.20832	1.02685	0.997789	EMT-Puro	2	1.126	2	7.3717
3	5	5.2943	0.858491	1.0037	EMT-Puro	3	0.996252	2	7.3717
1	9	5.31601	0.987531	1.00193	NoPuro	2	1.15582	2	7.3717
2	11	5.37769	0.969231	1.01906	CHX-Puro	2	0.991963	2	7.3717
5	8	5.39944	1.3	0.999849	CHX-Puro	1	1.2066	2	7.3717
1	5	5.41114	1.17117	1.02382	Puro	1	0.957097	2	7.3717
3	2	5.46831	0.983957	0.999837	NoPuro	1	1.02191	2	7.3717
4	3	5.50943	1.28571	1.01061	Puro	3	0.956993	2	7.3717
10	2	5.5151	0.989247	1.01047	EMT-Puro	1	0.962854	2	7.3717
3	9	5.6289	1.125	1.02713	EMT-Puro	4	0.930285	2	7.3717
4	1	5.68749	0.9	1.00669	EMT-Puro	2	1.13063	2	7.3717
3	3.2	5.73089	0.524017	0.99898	NoPuro	1	0.88815	2	7.3717
3	3.1	5.73089	0.410256	0.991162	NoPuro	1	0.926695	2	7.3717
10	3	5.78576	1.46809	0.986998	EMT-Puro	1	0.960312	2	7.3717
2	1	5.79417	1.22222	1.03925	NoPuro	2	1.1632	2	7.3717
5	9	5.80342	1.08982	1.00386	CHX-Puro	1	1.18251	2	7.3717
1	6	5.82402	0.784314	1.01328	Puro	1	0.9283	2	7.3717
3	1	5.83673	0.638298	1.00271	CHX-Puro	2	0.956597	2	7.3717
4	4	5.91932	1.00465	1.01861	Puro	3	0.957458	2	7.3717
4	3	5.94067	0.969231	1.0016	CHX-Puro	3	0.876849	2	7.3717
3	4	5.97207	0.985263	1.00406	NoPuro	1	0.891939	2	7.3717
3	10	6.02163	0.968858	1.00483	EMT-Puro	4	0.933745	2	7.3717
4	2.1	6.07337	1.34146	1.00775	EMT-Puro	2	1.14818	2	7.3717
4	2.2	6.07337	1.06719	1.00215	EMT-Puro	2	1.17669	2	7.3717
10	4	6.07592	1.49074	1.00374	EMT-Puro	1	1.08465	2	7.3717
6	1	6.18556	0.592593	1.009	CHX-Puro	1	1.1308	2	7.3717
2	2	6.23816	0.934132	1.00534	NoPuro	2	1.14029	2	7.3717
3	5	6.24995	1.26316	0.994295	NoPuro	1	0.929079	2	7.3717
2	1	6.25409	1.0566	1.03206	NoPuro	3	1.22109	2	7.3717
1	7.1	6.26798	1.42857	0.992773	Puro	1	0.999767	2	7.3717
1	7.2	6.26798	1.37255	1.0506	Puro	1	1.04637	2	7.3717
1	9	6.33145	1.07692	0.969906	Puro	2	1.17587	2	7.3717
10	5	6.35395	1.00822	0.997468	EMT-Puro	1	1.07673	2	7.3717
4	5	6.38403	1.27778	0.996378	Puro	3	0.996347	2	7.3717
4	3.2	6.4474	1.03139	1.00158	EMT-Puro	2	1.08708	2	7.3717
4	3.1	6.4474	1.00559	1.00086	EMT-Puro	2	1.07969	2	7.3717
3	6	6.5268	1.16317	0.941931	NoPuro	1	0.967256	2	7.3717
6	2	6.56061	0.683616	1.00298	CHX-Puro	1	1.06916	2	7.3717
2	3	6.61748	0.928571	1.01079	NoPuro	2	1.09426	2	7.3717
10	6	6.63184	0.866667	0.998109	EMT-Puro	1	1.06401	2	7.3717
2	2	6.63612	0.938547	1.01304	NoPuro	3	1.19283	2	7.3717
3	3	6.67499	0.936306	1.00649	CHX-Puro	2	0.952138	2	7.3717
1	8	6.67945	1.36842	1.03765	Puro	1	1.08215	2	7.3717
1	10	6.75071	0.857143	1.00851	Puro	2	1.13603	2	7.3717
3	7	6.78276	0.55814	0.996229	NoPuro	1	0.912087	2	7.3717
3	6	6.81021	1.2268	1.01114	EMT-Puro	3	1.01931	2	7.3717
10	7	6.88087	1.15	0.989741	EMT-Puro	1	1.05929	2	7.3717
3	11	6.90173	1.36364	1.00187	EMT-Puro	4	0.956472	2	7.3717
2	4	7.03793	1.01646	1.01867	NoPuro	2	1.09471	2	7.3717
3	8.2	7.06243	1.10983	1.00088	NoPuro	1	0.899612	2	7.3717
3	8.1	7.06243	1.11412	1.00005	NoPuro	1	0.916729	2	7.3717
10	8	7.15068	0.75102	1.00594	EMT-Puro	1	1.04272	2	7.3717
4	4	7.21371	0.658537	0.989717	EMT-Puro	2	0.972937	2	7.3717
3	7	7.22865	0.844828	0.999802	EMT-Puro	3	1.00056	2	7.3717
1	11	7.24001	0.792453	1.03792	Puro	2	1.09785	2	7.3717
4	4	7.28938	1.35	1.00701	CHX-Puro	3	0.916224	2	7.3717
3	9	7.34782	1.01727	0.993651	NoPuro	1	0.912917	2	7.3717
4	1.3	7.3717	1.07143	0.996601	EMT-Puro	4	0.945329	2	7.3717
4	1.2	7.3717	0.861702	0.997858	EMT-Puro	4	0.967214	2	7.3717
4	1.1	7.3717	1.08	1.01225	EMT-Puro	4	1.00819	2	7.3717
10	9	7.43975	1.49351	1.00953	EMT-Puro	1	1.07707	2	7.3717
4	6	7.45264	1.02058	1.00486	Puro	3	0.938404	2	7.3717
4	5	7.62525	1.24468	1.00778	EMT-Puro	2	1.01433	2	7.3717
4	1	7.65903	1.51579	1.00504	NoPuro	1	0.966101	2	7.3717
4	5	7.69446	1.08434	1.00697	CHX-Puro	3	0.937911	2	7.3717
6	4	7.75582	1.43713	1.00405	CHX-Puro	1	1.14281	2	7.3717
4	7	7.85556	0.757895	1.01387	Puro	3	0.911163	2	7.3717
2	1	7.9286	0.909091	0.995677	Puro	1	1.06484	2	7.3717
4	2	7.93592	1.02674	0.991088	NoPuro	1	1.02775	2	7.3717
2	5	7.94635	1.10714	0.999199	NoPuro	2	1.09709	2	7.3717
3	4	8.02383	1.14754	0.994322	CHX-Puro	2	0.933012	2	7.3717
4	6	8.10481	0.769231	1.02128	CHX-Puro	3	0.953295	2	7.3717
11	2	8.1072	1.23656	1.00422	EMT-Puro	1	1.13501	2	7.3717
4	3	8.18281	0.928571	1.00714	EMT-Puro	4	1.01534	2	7.3717
4	3.1	8.20854	0.717949	0.996085	NoPuro	1	1.04714	2	7.3717
4	3.2	8.20854	1.36245	0.997648	NoPuro	1	1.08486	2	7.3717
2	2	8.35017	1.35484	1.01028	Puro	1	1.09427	2	7.3717
11	3	8.38887	1.19622	0.99644	EMT-Puro	1	1.16503	2	7.3717
4	7	8.38992	0.818182	1.00166	EMT-Puro	2	1.00484	2	7.3717
4	4	8.45455	0.858947	0.992518	NoPuro	1	1.04444	2	7.3717
4	7.2	8.51144	0.978261	0.992586	CHX-Puro	3	0.943513	2	7.3717
4	7.1	8.51144	1.67442	1.00031	CHX-Puro	3	1.09002	2	7.3717
3	9	8.58597	1.22581	0.957732	EMT-Puro	3	1.05191	2	7.3717
11	4	8.69361	1.06481	1.01271	EMT-Puro	1	1.17258	2	7.3717
3	5	8.73162	1.08738	1.00813	CHX-Puro	2	0.912624	2	7.3717
4	5	8.73368	1.42105	0.998986	NoPuro	1	1.07023	2	7.3717
2	3	8.76797	0.566038	0.992695	Puro	1	1.04764	2	7.3717
2	6	8.82575	0.745763	1.00067	NoPuro	2	1.04862	2	7.3717
2	4	8.83631	1.06509	0.988891	NoPuro	3	1.1484	2	7.3717
2	1	8.84305	1.17647	1.00059	Puro	2	1.10572	2	7.3717
4	8	8.89089	0.993103	1.00201	CHX-Puro	3	1.0652	2	7.3717
11	5	8.97999	1.07123	0.99549	EMT-Puro	1	1.1329	2	7.3717
4	6	8.99928	1.20194	1.03307	NoPuro	1	1.13461	2	7.3717
3	6	9.14252	1.11364	1.00322	CHX-Puro	2	0.934897	2	7.3717
2	4	9.16978	1.01911	1.00409	Puro	1	1.09295	2	7.3717
4	8	9.24712	0.848485	0.9905	Puro	3	0.894746	2	7.3717
2	2	9.24796	1.3913	0.994262	Puro	2	1.1405	2	7.3717
11	6	9.25374	0.9	0.990868	EMT-Puro	1	1.07382	2	7.3717
2	7	9.25691	0.761905	1.0057	NoPuro	2	1.01767	2	7.3717
4	7	9.27034	0.781395	1.01114	NoPuro	1	1.10134	2	7.3717
4	5	9.32843	0.874286	1.00911	EMT-Puro	4	0.989621	2	7.3717
3	11	9.39702	1.15068	1.00541	EMT-Puro	3	1.07038	2	7.3717
4	9	9.40165	1.23529	1.01393	CHX-Puro	3	1.09167	2	7.3717
4	8	9.41409	1.10769	0.99459	EMT-Puro	2	1.02016	2	7.3717
11	7	9.51621	0.958333	0.972965	EMT-Puro	1	1.06884	2	7.3717
3	7	9.51774	0.833333	1.00754	CHX-Puro	2	0.934897	2	7.3717
4	8.2	9.54144	1.10983	0.994036	NoPuro	1	1.10134	2	7.3717
4	8.1	9.54144	1.0677	0.998005	NoPuro	1	1.10638	2	7.3717
2	5	9.58122	0.900901	1.01833	Puro	1	1.0875	2	7.3717
6	6	9.5957	0.716535	0.995864	CHX-Puro	1	1.08113	2	7.3717
4	9	9.62604	1.21519	0.978416	Puro	3	0.950512	2	7.3717
2	5	9.68117	1.55294	1.01764	NoPuro	3	1.13609	2	7.3717
4	6	9.72403	1.08	0.99996	EMT-Puro	4	1.03762	2	7.3717
3	12	9.77272	0.935849	0.991406	EMT-Puro	3	1.03713	2	7.3717
4	10	9.77634	1.13592	1.14453	CHX-Puro	3	1.11788	2	7.3717
11	8	9.78735	1.12653	1.0137	EMT-Puro	1	1.09482	2	7.3717
4	9	9.82796	1.09262	0.999121	NoPuro	1	1.06406	2	7.3717
3	8	9.89231	1.09804	1.00117	CHX-Puro	2	0.930321	2	7.3717
2	6	9.99043	0.980392	1.00863	Puro	1	1.06842	2	7.3717
6	7	9.99437	1.10976	1.00212	CHX-Puro	1	1.06781	2	7.3717
4	10	10.0034	0.986301	0.996292	Puro	3	0.947992	2	7.3717
11	9	10.0723	0.597403	1.00255	EMT-Puro	1	1.03956	3	12.5626
5	1	10.1513	1.26316	0.993056	NoPuro	1	1.0877	3	12.5626
3	13	10.1538	1.07317	0.957954	EMT-Puro	3	1.03899	3	12.5626
4	9.2	10.2168	1.04348	0.999345	EMT-Puro	2	1.02182	3	12.5626
4	9.1	10.2168	0.818182	0.991104	EMT-Puro	2	1.01364	3	12.5626
5	2	10.4304	1.06952	0.988017	NoPuro	1	1.12286	3	12.5626
4	8	10.4989	1.43182	0.998906	EMT-Puro	4	1.07853	3	12.5626
2	6	10.5464	0.594059	1.00129	NoPuro	3	1.09609	3	12.5626
6	8	10.5698	0.65	1.006	CHX-Puro	1	1.01784	3	12.5626
5	2	10.6098	0.89011	1.02151	CHX-Puro	3	1.10799	3	12.5626
4	10	10.6368	0.90604	1.00229	EMT-Puro	2	0.970096	3	12.5626
4	1	10.6469	1.06987	1.01919	EMT-Puro	3	1.03883	3	12.5626
5	3.1	10.6946	1.12821	0.995951	NoPuro	1	1.09738	3	12.5626
5	3.2	10.6946	0.838428	0.997676	NoPuro	1	1.07046	3	12.5626
2	9	10.7145	1.16708	0.992907	NoPuro	2	1.03946	3	12.5626
12	2	10.7478	0.494624	0.996318	EMT-Puro	1	1.01392	3	12.5626
4	11	10.8307	1.01149	0.999381	Puro	3	0.999142	3	12.5626
4	9	10.9033	0.959559	1.02372	EMT-Puro	4	1.06199	3	12.5626
5	4	10.9607	0.96	0.999353	NoPuro	1	1.05128	3	12.5626
6	9	10.9668	0.778443	0.996023	CHX-Puro	1	0.962618	3	12.5626
2	7	10.9676	0.811475	1.01162	NoPuro	3	1.07842	3	12.5626
5	3	11.0223	1.38462	0.999802	CHX-Puro	3	1.14953	3	12.5626
12	3	11.0273	0.978723	0.99711	EMT-Puro	1	0.962444	3	12.5626
5	1	11.1155	1.125	0.992983	EMT-Puro	2	0.975877	3	12.5626
2	7.1	11.1204	0.788177	1.02653	Puro	1	1.08281	3	12.5626
2	7.2	11.1204	1.56863	1.00725	Puro	1	1.14685	3	12.5626
5	5	11.2371	0.552632	0.998459	NoPuro	1	0.986348	3	12.5626
5	1	11.2582	1	0.999909	Puro	3	1.04081	3	12.5626
4	10	11.2896	1.07266	1.00218	EMT-Puro	4	1.07237	3	12.5626
12	4	11.3171	1.06481	1.0014	EMT-Puro	1	0.945269	3	12.5626
7	1	11.3339	1.33333	0.988852	CHX-Puro	1	0.969122	3	12.5626
4	2	11.3638	0.785714	1.00421	EMT-Puro	3	1.03125	3	12.5626
2	8	11.3791	1.23026	1.01191	NoPuro	3	1.09451	3	12.5626
5	2.2	11.5035	0.948617	1.0093	EMT-Puro	2	0.964602	3	12.5626
5	2.1	11.5035	0.97561	0.998791	EMT-Puro	2	0.972879	3	12.5626
5	6	11.5163	1.00808	0.952031	NoPuro	1	1.00902	3	12.5626
2	8	11.5239	0.631579	0.99959	Puro	1	1.00872	3	12.5626
12	5	11.5951	1.07123	0.990405	EMT-Puro	1	0.932771	3	12.5626
4	11	11.6903	0.984848	1.00735	EMT-Puro	4	1.03449	3	12.5626
7	2	11.7223	1.49153	1.01171	CHX-Puro	1	0.988275	3	12.5626
3	1	11.7281	1.05556	0.990912	NoPuro	2	0.992637	3	12.5626
5	7	11.7825	0.55814	0.997864	NoPuro	1	0.953848	3	12.5626
4	3	11.7849	1.34615	1.00169	EMT-Puro	3	1.05174	3	12.5626
2	9	11.7916	1.13944	0.994673	NoPuro	3	1.06419	3	12.5626
5	3.1	11.8744	1.39665	1.00096	EMT-Puro	2	1.03841	3	12.5626
5	3.2	11.8744	1.16592	1.00513	EMT-Puro	2	1.03054	3	12.5626
12	6	11.8773	1.13333	0.998075	EMT-Puro	1	0.939623	3	12.5626
5	8.2	12.0568	0.971098	1.00167	NoPuro	1	0.944188	3	12.5626
5	8.1	12.0568	1.0677	1.00293	NoPuro	1	0.941695	3	12.5626
12	7	12.127	0.766667	0.971948	EMT-Puro	1	0.909166	3	12.5626
5	1.1	12.1514	0.822857	1.00406	EMT-Puro	4	1.05203	3	12.5626
5	1.2	12.1514	0.957447	0.989118	EMT-Puro	4	1.03978	3	12.5626
5	1.3	12.1514	1.28571	1.01601	EMT-Puro	4	1.05592	3	12.5626
5	2	12.1629	1.3125	1.01596	Puro	3	1.04349	3	12.5626
4	4	12.1771	1.1413	1.003	EMT-Puro	3	1.08002	3	12.5626
2	4	12.1878	0.857143	1.01163	Puro	2	1.08504	3	12.5626
3	1	12.2454	0.981132	0.970645	NoPuro	3	1.04652	3	12.5626
5	4	12.2601	2.19512	0.999591	EMT-Puro	2	1.16823	3	12.5626
5	4	12.2718	0.84375	0.999759	CHX-Puro	3	1.0989	3	12.5626
3	9	12.2842	0.75	0.999201	CHX-Puro	2	0.905321	3	12.5626
5	9	12.3555	0.866562	0.996063	NoPuro	1	0.902036	3	12.5626
12	8	12.3859	0.657143	1.01975	EMT-Puro	1	0.88488	3	12.5626
5	3	12.5626	0.857143	1.00786	Puro	3	1.02874	3	12.5626
4	5	12.5889	0.792453	1.00128	EMT-Puro	3	1.03658	3	12.5626
3	2	12.6264	0.938547	0.996657	NoPuro	3	1.03081	3	12.5626
5	5	12.663	1.05319	1.0219	EMT-Puro	2	1.16278	3	12.5626
5	5	12.6671	0.975904	1.00338	CHX-Puro	3	1.08806	3	12.5626
12	9	12.6708	2.09091	1.00262	EMT-Puro	1	0.998138	3	12.5626
6	1	12.6757	1.13684	0.997109	NoPuro	1	0.908768	3	12.5626
2	5	12.7674	0.827586	1.04254	Puro	2	1.03331	3	12.5626
3	2	12.8265	0.700599	0.999113	NoPuro	2	0.963943	3	12.5626
7	4	12.9317	0.790419	1.00657	CHX-Puro	1	0.958335	3	12.5626
6	2	12.9564	1.02674	0.992057	NoPuro	1	0.927599	3	12.5626
4	6	12.9683	1.01031	0.984961	EMT-Puro	3	1.05313	3	12.5626
5	4	12.9799	1.07907	1.01339	Puro	3	1.00887	3	12.5626
5	6	13.0824	1.23077	0.989379	CHX-Puro	3	1.13421	3	12.5626
3	10	13.1564	0.958904	0.999074	CHX-Puro	2	0.953267	3	12.5626
3	3	13.209	0.77381	0.9977	NoPuro	2	0.919102	3	12.5626
6	3.2	13.2306	0.733624	0.994688	NoPuro	1	0.843423	3	12.5626
6	3.1	13.2306	0.512821	0.998884	NoPuro	1	0.866061	3	12.5626
13	2	13.3399	0.989247	1.00125	EMT-Puro	1	0.98441	3	12.5626
4	7	13.3797	0.724138	0.997444	EMT-Puro	3	1.00296	3	12.5626
3	4	13.43	0.852071	0.995213	NoPuro	3	1.01036	3	12.5626
3	1	13.4351	0.909091	1.00187	Puro	1	0.962784	3	12.5626
5	5	13.4479	1	1.00678	Puro	3	1.00681	3	12.5626
6	4	13.4797	1.06105	0.997743	NoPuro	1	0.894265	3	12.5626
5	7.2	13.4891	1.27174	1.01153	CHX-Puro	3	1.16356	3	12.5626
5	7.1	13.4891	1.25581	0.998012	CHX-Puro	3	1.1217	3	12.5626
3	11	13.5635	0.861538	0.985748	CHX-Puro	2	0.942497	3	12.5626
5	7	13.5873	1.14545	0.992601	EMT-Puro	2	1.17298	3	12.5626
13	3	13.6233	0.652482	0.986663	EMT-Puro	1	0.989918	3	12.5626
2	6	13.6406	1.21739	0.993753	Puro	2	1.0507	3	12.5626
6	5	13.7539	0.789474	0.992109	NoPuro	1	0.872405	3	12.5626
3	5	13.85	0.988235	1.00473	NoPuro	3	1.01533	3	12.5626
5	8	13.8626	0.744828	1.00193	CHX-Puro	3	1.09687	3	12.5626
3	4	13.8885	1.28395	1.00289	NoPuro	2	0.954084	3	12.5626
13	4	13.9006	0.851852	1.01395	EMT-Puro	1	1.02564	3	12.5626
4	1	14.0257	1.14894	1.00708	CHX-Puro	2	0.993561	3	12.5626
6	6	14.0409	0.852989	1.04066	NoPuro	1	0.90189	3	12.5626
2	7	14.068	1.05263	1.00951	Puro	2	1.08228	3	12.5626
4	9	14.1559	1.06452	1.00722	EMT-Puro	3	0.994348	3	12.5626
13	5	14.1839	0.945205	0.984187	EMT-Puro	1	1.02229	3	12.5626
5	3	14.1956	1	1.00953	EMT-Puro	4	1.04692	3	12.5626
5	9	14.2675	0.705882	1.00191	CHX-Puro	3	1.04393	3	12.5626
6	7	14.304	0.893023	0.99276	NoPuro	1	0.894082	3	12.5626
3	6	14.3052	0.950495	1.0086	NoPuro	3	1.00387	3	12.5626
3	5	14.3181	1.21429	0.993046	NoPuro	2	0.982655	3	12.5626
7	6	14.4486	1.02362	1.00367	CHX-Puro	1	1.00144	3	12.5626
13	6	14.4591	1.25	0.993918	EMT-Puro	1	1.04081	3	12.5626
2	8	14.4906	0.491803	0.971469	Puro	2	0.974085	3	12.5626
6	8.1	14.5947	0.649903	0.982369	NoPuro	1	0.852303	3	12.5626
6	8.2	14.5947	0.83237	0.993007	NoPuro	1	0.848884	3	12.5626
13	7	14.7066	1.725	0.979926	EMT-Puro	1	1.10618	3	12.5626
5	8	14.7183	0.969231	0.985889	EMT-Puro	2	1.18808	3	12.5626
3	7	14.7247	1.62295	1.01095	NoPuro	3	1.01087	3	12.5626
5	6	14.7528	1.02058	1.00345	Puro	3	1.03308	3	12.5626
3	6	14.7626	0.881356	0.998456	NoPuro	2	0.969145	3	12.5626
5	10	14.8049	1.13592	1.06751	CHX-Puro	3	1.04393	3	12.5626
7	7	14.8445	1.10976	1.00981	CHX-Puro	1	1.04405	3	12.5626
4	3	14.8726	0.847134	1.00807	CHX-Puro	2	0.984644	3	12.5626
6	9	14.8896	1.09262	0.994245	NoPuro	1	0.844462	3	12.5626
4	11	14.952	1.09589	1.02051	EMT-Puro	3	1.01035	3	12.5626
5	5	14.9762	1.02857	0.996255	EMT-Puro	4	1.06235	3	12.5626
13	8	14.9767	0.563265	1.01583	EMT-Puro	1	1.04918	3	12.5626
3	2	14.99	0.903226	0.995733	Puro	1	0.962198	3	12.5626
3	8	15.1452	1.01316	1.00086	NoPuro	3	1.05278	4	17.512
5	9.2	15.1512	0.391304	0.988089	EMT-Puro	2	1.13661	4	17.512
5	9.1	15.1512	0.886364	0.986384	EMT-Puro	2	1.11275	4	17.512
5	7	15.1658	1.01053	0.997128	Puro	3	1.04928	4	17.512
3	7	15.1964	1.2381	0.997428	NoPuro	2	0.98224	4	17.512
7	1	15.2034	0.757895	0.991868	NoPuro	1	0.817577	4	17.512
7	8	15.2555	1.95	1.0034	CHX-Puro	1	1.09534	4	17.512
13	9	15.2615	1.19481	1.00389	EMT-Puro	1	1.09199	4	17.512
4	12	15.3358	1.20755	1.01898	EMT-Puro	3	1.02379	4	17.512
5	6	15.3705	1.08	0.99968	EMT-Puro	4	1.06235	4	17.512
3	3	15.4115	0.754717	0.994506	Puro	1	0.902186	4	17.512
7	2	15.4749	0.941176	0.981702	NoPuro	1	0.860413	4	17.512
3	9	15.5582	0.832669	1.00032	NoPuro	3	1.0549	4	17.512
5	10	15.5872	0.66443	0.999078	EMT-Puro	2	1.08163	4	17.512
6	2	15.6263	0.692308	1.00587	CHX-Puro	3	1.02415	4	17.512
7	9	15.6541	0.856287	0.990896	CHX-Puro	1	1.10931	4	17.512
4	13	15.7188	1.07317	0.988621	EMT-Puro	3	1.02412	4	17.512
5	8	15.7439	0.545455	0.998715	Puro	3	0.982307	4	17.512
7	3.2	15.7443	1.46725	0.99129	NoPuro	1	0.961003	4	17.512
7	3.1	15.7443	1.33333	0.999897	NoPuro	1	0.920384	4	17.512
2	9	15.7903	0.923077	0.973013	Puro	2	0.9587	4	17.512
3	4	15.8175	0.955414	1.01533	Puro	1	0.941123	4	17.512
14	2	15.9298	2.22581	0.990417	EMT-Puro	1	1.24886	4	17.512
7	4	15.9874	0.96	0.995444	NoPuro	1	0.978056	4	17.512
4	1	15.9952	1.13208	0.97385	NoPuro	3	1.04508	4	17.512
3	9	16.0167	0.80798	0.999449	NoPuro	2	0.988462	4	17.512
8	1	16.0432	0.740741	0.992627	CHX-Puro	1	1.07241	4	17.512
6	1	16.0578	1.05	1.00267	EMT-Puro	2	1.09177	4	17.512
5	9	16.1243	1.21519	1.01278	Puro	3	1.0052	4	17.512
5	1	16.2045	1.17686	0.997696	EMT-Puro	3	1.06323	4	17.512
14	3	16.2057	0.869976	0.971497	EMT-Puro	1	1.12676	4	17.512
7	5	16.2728	1.42105	1.00113	NoPuro	1	1.03486	4	17.512
5	8	16.3012	0.818182	0.98867	EMT-Puro	4	1.00098	4	17.512
4	2	16.3784	0.871508	0.990489	NoPuro	3	1.01828	4	17.512
8	2	16.421	1.24294	0.990048	CHX-Puro	1	1.13171	4	17.512
6	2.2	16.4404	1.06719	0.993366	EMT-Puro	2	1.05199	4	17.512
6	2.1	16.4404	1.09756	0.998827	EMT-Puro	2	1.06186	4	17.512
4	1	16.4825	0.944444	0.993387	NoPuro	2	1.00672	4	17.512
14	4	16.4906	1.06481	1.00523	EMT-Puro	1	1.13432	4	17.512
7	6	16.5412	0.891761	0.981295	NoPuro	1	1.03474	4	17.512
5	2	16.5973	1.42857	1.0044	EMT-Puro	3	1.07148	4	17.512
4	4	16.6491	0.994536	0.990152	CHX-Puro	2	0.969344	4	17.512
5	9	16.7056	1.19118	0.999391	EMT-Puro	4	1.02415	4	17.512
14	5	16.7756	1.19726	0.999931	EMT-Puro	1	1.1888	4	17.512
6	3	16.7964	1.10769	0.996996	CHX-Puro	3	0.996461	4	17.512
7	7	16.8005	0.669767	0.977497	NoPuro	1	1.03672	4	17.512
6	3.2	16.8161	0.762332	0.996079	EMT-Puro	2	0.908706	4	17.512
6	3.1	16.8161	0.949721	0.999616	EMT-Puro	2	0.898359	4	17.512
4	2	16.9128	1.24551	0.994921	NoPuro	2	1.01456	4	17.512
5	3	17.0091	1.02308	0.993154	EMT-Puro	3	1.05965	4	17.512
4	5	17.0392	0.951456	1.00297	CHX-Puro	2	0.955751	4	17.512
14	6	17.0557	0.85	0.996701	EMT-Puro	1	1.18861	4	17.512
7	8.2	17.071	1.24855	0.997839	NoPuro	1	1.048	4	17.512
7	8.1	17.071	0.789168	0.983171	NoPuro	1	1.0324	4	17.512
5	10	17.0963	1.10727	1.00429	EMT-Puro	4	1.02761	4	17.512
2	10	17.1183	1.10204	0.995048	Puro	2	0.98319	4	17.512
6	4	17.1854	1.18125	1.00583	CHX-Puro	3	1.03021	4	17.512
6	4	17.2131	1.31707	1.00332	EMT-Puro	2	0.915521	4	17.512
5	10	17.2596	0.547945	1.00156	Puro	3	0.95884	4	17.512
4	3	17.2959	0.77381	0.997445	NoPuro	2	0.986384	4	17.512
14	7	17.3018	1.15	0.979843	EMT-Puro	1	1.20909	4	17.512
7	9	17.3516	1.01727	0.993385	NoPuro	1	1.07393	4	17.512
5	4	17.3991	1.36957	0.997741	EMT-Puro	3	1.11736	4	17.512
3	5	17.4135	1.08108	0.970642	Puro	1	0.947321	4	17.512
4	6	17.4603	0.668182	0.992232	CHX-Puro	2	0.911206	4	17.512
4	4	17.5637	0.852071	0.993743	NoPuro	3	1.00538	4	17.512
14	8	17.5702	1.03265	1.02049	EMT-Puro	1	1.18736	4	17.512
6	5	17.5989	0.759036	0.999016	CHX-Puro	3	1.00852	4	17.512
2	11	17.6006	0.90566	1.01401	Puro	2	0.994511	4	17.512
6	5	17.6192	0.957447	1.00366	EMT-Puro	2	0.914342	4	17.512
5	11	17.6703	1.10345	1.00568	Puro	3	0.969185	4	17.512
8	1	17.6792	0.505263	0.983133	NoPuro	1	1.03034	4	17.512
8	4	17.7063	1.29341	1.00578	CHX-Puro	1	1.1832	4	17.512
5	5	17.8063	0.726415	0.995252	EMT-Puro	3	1.08897	4	17.512
14	9	17.8487	1.19481	0.998333	EMT-Puro	1	1.13434	4	17.512
5	11	17.9316	0.833333	0.999991	EMT-Puro	4	1.01245	4	17.512
8	2	17.9535	1.1123	0.976413	NoPuro	1	1.00824	4	17.512
4	5	17.9773	0.847059	1.00833	NoPuro	3	0.996229	4	17.512
6	6	18.0359	1.15385	1.00692	CHX-Puro	3	1.00083	4	17.512
8	3.1	18.2319	1.12821	0.994356	NoPuro	1	0.974334	4	17.512
8	3.2	18.2319	1.57205	0.987701	NoPuro	1	1.03554	4	17.512
4	4	18.2882	0.909465	0.990541	NoPuro	2	1.00727	4	17.512
6	1.3	18.3947	1.57143	0.990555	EMT-Puro	4	1.11461	4	17.512
6	1.2	18.3947	1.43617	1.02164	EMT-Puro	4	1.0275	4	17.512
6	1.1	18.3947	1.08	1.03481	EMT-Puro	4	1.05321	4	17.512
6	7	18.3989	1.47273	0.998652	EMT-Puro	2	1.02248	4	17.512
6	7.1	18.4315	0.837209	0.999885	CHX-Puro	3	0.919841	4	17.512
6	7.2	18.4315	0.880435	1.00306	CHX-Puro	3	0.961701	4	17.512
8	4	18.4823	1.26316	0.992332	NoPuro	1	1.01975	4	17.512
3	6	18.5217	0.980392	0.994995	Puro	1	0.95527	4	17.512
15	2	18.523	1.48387	0.991067	EMT-Puro	1	1.2264	4	17.512
8	6	18.5271	0.92126	0.999826	CHX-Puro	1	1.142	4	17.512
6	1	18.5825	1.16667	0.985806	Puro	3	0.954602	4	17.512
4	5	18.7167	1.03571	0.996446	NoPuro	2	1.03346	4	17.512
4	6	18.7507	1.06931	0.990757	NoPuro	3	1.01795	4	17.512
8	5	18.7581	0.947368	0.991589	NoPuro	1	1.02531	4	17.512
15	3	18.7924	0.706856	0.980619	EMT-Puro	1	1.1776	4	17.512
6	8	18.8226	1.11724	1.00505	CHX-Puro	3	0.957082	4	17.512
8	7	18.9279	0.95122	0.998257	CHX-Puro	1	1.08797	4	17.512
3	7.2	18.9528	1.27451	1.00409	Puro	1	0.950971	4	17.512
3	7.1	18.9528	1.23153	0.9885	Puro	1	0.980383	4	17.512
6	2	18.9528	0.729167	0.989452	Puro	3	0.941804	4	17.512
5	6	19.0072	0.865979	1.00782	EMT-Puro	3	1.10316	4	17.512
8	6	19.0324	1.24071	0.993903	NoPuro	1	1.0824	4	17.512
15	4	19.0832	1.27778	1.00764	EMT-Puro	1	1.0828	4	17.512
4	7	19.131	1.16667	0.984788	CHX-Puro	2	0.944539	4	17.512
6	3	19.2101	1	1.02113	EMT-Puro	4	1.11461	4	17.512
6	8	19.2107	1.24615	0.996885	EMT-Puro	2	1.05846	4	17.512
3	1	19.2175	0.823529	0.994768	Puro	2	0.959217	4	17.512
6	9	19.2213	1.32353	1.00818	CHX-Puro	3	1.01885	4	17.512
4	6	19.2628	0.881356	0.99597	NoPuro	2	0.993202	4	17.512
8	7	19.3008	0.893023	0.982941	NoPuro	1	1.09279	4	17.512
8	8	19.3292	0.975	0.998402	CHX-Puro	1	1.10642	4	17.512
3	8	19.3659	0.842105	1.00839	Puro	1	0.956364	4	17.512
15	5	19.3708	1.51233	0.990828	EMT-Puro	1	1.14704	4	17.512
4	8	19.5215	1.14379	0.995765	CHX-Puro	2	0.949114	4	17.512
8	8.2	19.5745	0.554913	0.990939	NoPuro	1	1.02343	4	17.512
8	8.1	19.5745	0.928433	0.988992	NoPuro	1	1.01454	4	17.512
6	10	19.6125	1.57282	0.92427	CHX-Puro	3	1.06254	4	17.512
3	2	19.633	1.21739	1.01082	Puro	2	0.941825	4	17.512
6	9.2	19.6371	1.30435	1.00263	EMT-Puro	2	1.12246	4	17.512
6	9.1	19.6371	1.02273	1.00778	EMT-Puro	2	1.11973	4	17.512
15	6	19.652	1.18333	1.004	EMT-Puro	1	1.15889	4	17.512
4	7	19.7035	1.17213	0.993389	NoPuro	3	1.03634	4	17.512
4	7	19.7058	0.857143	0.994929	NoPuro	2	0.957487	4	17.512
8	9	19.7296	0.778443	0.999139	CHX-Puro	1	1.08191	4	17.512
8	9	19.8643	0.828885	0.99829	NoPuro	1	1.0469	4	17.512
15	7	19.9053	1.15	0.965234	EMT-Puro	1	1.15416	4	17.512
4	9	19.9099	1.08333	1.0025	CHX-Puro	2	0.982448	4	17.512
6	3	19.9537	1.57143	0.988183	Puro	3	0.99104	4	17.512
6	10	20.0443	1.26846	1.00547	EMT-Puro	2	1.13682	5	22.7529
9	1	20.1094	0.888889	1.00584	CHX-Puro	1	1.05982	5	22.7529
9	1	20.1775	0.757895	0.983075	NoPuro	1	1.01146	5	22.7529
15	8	20.1779	1.03265	1.0175	EMT-Puro	1	1.17243	5	22.7529
4	1	20.2683	1.06061	0.994224	Puro	1	0.999267	5	22.7529
4	10	20.3362	1.05479	0.998879	CHX-Puro	2	0.992037	5	22.7529
6	5	20.357	0.874286	0.995344	EMT-Puro	4	1.09918	5	22.7529
6	4	20.3682	1.11628	0.997404	Puro	3	1.00267	5	22.7529
9	2	20.4495	1.15508	1.00022	NoPuro	1	1.01415	5	22.7529
7	2	20.4503	0.89011	1.01223	CHX-Puro	3	1.08232	5	22.7529
15	9	20.4591	0.298701	0.998901	EMT-Puro	1	1.0873	5	22.7529
9	2	20.4986	0.80791	0.997455	CHX-Puro	1	0.94561	5	22.7529
4	9	20.5019	1.10723	1.0024	NoPuro	2	0.980075	5	22.7529
7	1	20.5197	1.35	1.00492	EMT-Puro	2	1.1651	5	22.7529
5	7	20.6538	1.2069	1.00878	EMT-Puro	3	1.1174	5	22.7529
4	2	20.7	0.774194	0.991582	Puro	1	0.985777	5	22.7529
9	3.1	20.7226	0.512821	0.983544	NoPuro	1	0.918158	5	22.7529
9	3.2	20.7226	1.36245	0.973929	NoPuro	1	0.993191	5	22.7529
6	6	20.7512	1.2	1.00747	EMT-Puro	4	1.11118	5	22.7529
4	11	20.7584	0.933333	1.00109	CHX-Puro	2	0.999216	5	22.7529
6	5	20.8281	1	1.01241	Puro	3	1.00061	5	22.7529
7	3	20.867	1.10769	1.011	CHX-Puro	3	1.08232	5	22.7529
4	8	20.968	1.23026	0.992727	NoPuro	3	1.06432	5	22.7529
5	1	20.9694	1.11111	0.985839	NoPuro	2	0.967376	5	22.7529
9	4	20.9824	0.934737	0.987408	NoPuro	1	0.916894	5	22.7529
4	3	21.1187	0.566038	1.00476	Puro	1	0.952058	5	22.7529
16	2	21.1208	0.989247	0.999153	EMT-Puro	1	1.08296	5	22.7529
5	1	21.235	1.2766	1.01166	CHX-Puro	2	1.01198	5	22.7529
9	5	21.2535	1.26316	0.994884	NoPuro	1	0.919139	5	22.7529
6	6	21.3175	0.888889	0.998151	Puro	3	0.988447	5	22.7529
5	2	21.3769	1.4012	1.00192	NoPuro	2	1.0267	5	22.7529
4	9	21.3869	1.09562	1.00285	NoPuro	3	1.01159	5	22.7529
16	3	21.3972	0.92435	0.983757	EMT-Puro	1	1.05591	5	22.7529
5	9	21.4559	0.645161	1.0074	EMT-Puro	3	1.07232	5	22.7529
4	4	21.5093	1.01911	0.999673	Puro	1	0.978498	5	22.7529
9	6	21.5223	1.00808	0.984111	NoPuro	1	0.930645	5	22.7529
6	8	21.526	0.613636	1.02021	EMT-Puro	4	1.09073	5	22.7529
16	4	21.6901	0.92284	1.00777	EMT-Puro	1	0.999809	5	22.7529
6	7	21.7257	1.01053	0.983282	Puro	3	1.03495	5	22.7529
5	3	21.7645	0.928571	1.00302	NoPuro	2	1.02511	5	22.7529
9	7	21.8008	0.55814	0.956756	NoPuro	1	0.930967	5	22.7529
5	1	21.822	0.981132	0.978096	NoPuro	3	1.00838	5	22.7529
9	4	21.8244	1.07784	0.998931	CHX-Puro	1	0.967766	5	22.7529
4	5	21.9234	0.990991	0.998424	Puro	1	0.982055	5	22.7529
7	2.2	21.9325	1.34387	1.0047	EMT-Puro	2	1.22584	5	22.7529
7	2.1	21.9325	0.97561	0.995651	EMT-Puro	2	1.18643	5	22.7529
6	9	21.9343	1.15809	0.996799	EMT-Puro	4	1.08742	5	22.7529
16	5	21.9819	1.00822	0.999279	EMT-Puro	1	1.02995	5	22.7529
9	8.2	22.0762	0.83237	1.00007	NoPuro	1	0.921361	5	22.7529
9	8.1	22.0762	0.510638	0.989779	NoPuro	1	0.889536	5	22.7529
5	4	22.1744	1.28395	0.997863	NoPuro	2	1.02896	5	22.7529
5	2	22.1998	1.13966	0.995565	NoPuro	3	1.03908	5	22.7529
16	6	22.2566	0.983333	0.993385	EMT-Puro	1	1.0005	5	22.7529
7	4	22.2788	0.9	0.986588	CHX-Puro	3	1.05419	5	22.7529
4	6	22.3381	0.980392	1.00349	Puro	1	0.971986	5	22.7529
9	9	22.3755	1.16797	0.999055	NoPuro	1	0.930544	5	22.7529
16	7	22.5233	1.725	0.966996	EMT-Puro	1	1.02177	5	22.7529
5	5	22.598	0.857143	0.996688	NoPuro	2	1.03729	5	22.7529
5	3	22.6172	1.11465	0.993816	CHX-Puro	2	1.03873	5	22.7529
7	5	22.6752	1.19277	0.997753	CHX-Puro	3	1.09756	5	22.7529
10	1	22.6956	0.757895	0.991514	NoPuro	1	0.890826	5	22.7529
6	8	22.7323	0.787879	1.00333	Puro	3	0.992223	5	22.7529
4	7.2	22.7735	0.882353	0.985768	Puro	1	0.962182	5	22.7529
4	7.1	22.7735	0.788177	1.00823	Puro	1	0.917847	5	22.7529
16	8	22.7906	0.75102	1.00015	EMT-Puro	1	0.978536	5	22.7529
7	3.1	22.7917	1.22905	1.0015	EMT-Puro	2	1.21704	5	22.7529
7	3.2	22.7917	0.807175	0.998206	EMT-Puro	2	1.20201	5	22.7529
6	10	22.8673	1.00346	0.987921	EMT-Puro	4	1.07704	5	22.7529
10	2	22.9736	0.983957	0.998749	NoPuro	1	0.852977	5	22.7529
5	4	23.0207	0.923077	0.995203	NoPuro	3	1.01818	5	22.7529
5	4	23.0509	0.918033	0.998104	CHX-Puro	2	1.03108	5	22.7529
16	9	23.0857	0.896104	1.00337	EMT-Puro	1	0.953147	5	22.7529
7	6	23.0978	0.538462	0.982419	CHX-Puro	3	1.03603	5	22.7529
6	9	23.1138	1.21519	1.01791	Puro	3	1.05895	5	22.7529
5	11	23.1562	1.0411	0.977928	EMT-Puro	3	1.05568	5	22.7529
4	8	23.1769	1.15789	1.01219	Puro	1	0.906186	5	22.7529
7	4	23.1817	1.09756	1.0042	EMT-Puro	2	1.1645	5	22.7529
10	3.1	23.2548	1.64103	0.995382	NoPuro	1	0.956166	5	22.7529
10	3.2	23.2548	0.838428	0.984684	NoPuro	1	0.885537	5	22.7529
6	11	23.2734	0.757576	1.00708	EMT-Puro	4	1.06946	5	22.7529
5	6	23.312	1.08475	0.984232	NoPuro	2	1.05482	5	22.7529
5	5	23.4305	1.83529	1.00312	NoPuro	3	1.11456	5	22.7529
6	10	23.4949	1.09589	0.979185	Puro	3	1.05819	5	22.7529
7	7.2	23.4953	1.17391	0.994307	CHX-Puro	3	1.04444	5	22.7529
7	7.1	23.4953	0.627907	1.00516	CHX-Puro	3	1.01077	5	22.7529
10	4	23.5066	1.13684	0.995537	NoPuro	1	0.943535	5	22.7529
5	12	23.5405	1.14717	0.984686	EMT-Puro	3	1.06308	5	22.7529
9	6	23.5434	1.02362	0.995381	CHX-Puro	1	0.996054	5	22.7529
7	5	23.5846	0.670213	1.00175	EMT-Puro	2	1.1069	5	22.7529
7	1.3	23.7415	0.785714	1.01298	EMT-Puro	4	0.947452	5	22.7529
7	1.1	23.7415	1.02857	0.977807	EMT-Puro	4	1.02602	5	22.7529
7	1.2	23.7415	1.05319	0.991408	EMT-Puro	4	1.03117	5	22.7529
5	7	23.7464	0.761905	0.991404	NoPuro	2	1.02744	5	22.7529
17	2	23.7634	0.741935	0.999827	EMT-Puro	1	0.924075	5	22.7529
10	5	23.7812	0.947368	0.996058	NoPuro	1	0.937464	5	22.7529
7	8	23.8795	1.11724	0.997047	CHX-Puro	3	1.04444	5	22.7529
6	11	23.8896	1.1954	0.997709	Puro	3	1.06107	5	22.7529
5	13	23.9226	0.829268	0.963721	EMT-Puro	3	1.02832	5	22.7529
9	7	23.9436	0.634146	0.99753	CHX-Puro	1	0.935175	5	22.7529
3	4	24.0228	0.957983	0.992775	Puro	2	0.951909	5	22.7529
17	3	24.0414	0.761229	0.992898	EMT-Puro	1	0.970328	5	22.7529
10	6	24.065	0.891761	0.936653	NoPuro	1	0.970826	5	22.7529
5	5	24.1467	0.951456	0.980794	CHX-Puro	2	1.03108	5	22.7529
5	6	24.1479	0.950495	1.00406	NoPuro	3	1.1244	5	22.7529
7	1	24.315	1	1.00761	Puro	3	1.08815	5	22.7529
10	7	24.3269	1.22791	0.980534	NoPuro	1	1.01038	5	22.7529
17	4	24.3306	1.06481	1.00517	EMT-Puro	1	0.977885	5	22.7529
9	8	24.3434	0.975	0.992161	CHX-Puro	1	0.903333	5	22.7529
7	7	24.3718	0.490909	0.996443	EMT-Puro	2	1.02556	5	22.7529
6	1	24.4103	0.901747	0.998894	EMT-Puro	3	0.975638	5	22.7529
5	6	24.5571	1.08182	1.00105	CHX-Puro	2	1.07245	5	22.7529
5	9	24.5602	0.957606	1.00038	NoPuro	2	1.03506	5	22.7529
3	5	24.5976	0.827586	1.02116	Puro	2	0.951909	5	22.7529
10	8.2	24.6066	1.52601	0.994734	NoPuro	1	1.10653	5	22.7529
10	8.1	24.6066	1.11412	0.984325	NoPuro	1	1.07073	5	22.7529
17	5	24.6187	0.756164	0.992808	EMT-Puro	1	0.961066	5	22.7529
7	2	24.6825	0.875	0.992045	Puro	3	1.01851	5	22.7529
9	9	24.7431	1.24551	1.00898	CHX-Puro	1	0.935758	5	22.7529
7	8	24.7533	0.830769	0.973083	EMT-Puro	2	1.00636	5	22.7529
6	2	24.8104	0.714286	0.993468	EMT-Puro	3	0.944758	5	22.7529
7	9	24.8221	1.32353	0.988162	CHX-Puro	3	1.04444	5	22.7529
10	9	24.8905	1.05495	0.993519	NoPuro	1	1.13624	5	22.7529
17	6	24.9047	1.1	0.996514	EMT-Puro	1	0.978782	5	22.7529
5	7	24.9371	1	1.00456	CHX-Puro	2	1.05578	5	22.7529
3	6	25.0421	1.04348	1.00149	Puro	2	0.934518	6	27.5438
5	1	25.0605	0.833333	1.00794	Puro	1	0.905309	6	27.5438
7	3	25.0793	0.428571	0.996331	Puro	3	0.949735	6	27.5438
5	7	25.1018	0.631148	0.990809	NoPuro	3	1.10281	6	27.5438
10	1	25.1336	0.444444	0.993512	CHX-Puro	1	0.885081	6	27.5438
17	7	25.1485	1.15	0.958883	EMT-Puro	1	0.99296	6	27.5438
7	10	25.1899	1.04854	0.838022	CHX-Puro	3	0.992017	6	27.5438
11	1	25.2095	0.884211	1.00022	NoPuro	1	1.12626	6	27.5438
6	3	25.2304	1.13077	0.997423	EMT-Puro	3	0.920879	6	27.5438
7	9.1	25.231	1.22727	1.01058	EMT-Puro	2	0.958548	6	27.5438
7	9.2	25.231	0.913043	1.0089	EMT-Puro	2	0.97082	6	27.5438
5	8	25.3219	0.960784	0.99076	CHX-Puro	2	1.03748	6	27.5438
17	8	25.429	0.938776	1.00429	EMT-Puro	1	0.988504	6	27.5438
6	1	25.474	0.944444	0.973822	NoPuro	2	1.04379	6	27.5438
11	2	25.4837	1.02674	0.968973	NoPuro	1	1.14509	6	27.5438
7	4	25.4844	1.37674	0.985674	Puro	3	0.987409	6	27.5438
5	2	25.4884	0.709677	1.00025	Puro	1	0.870216	6	27.5438
10	2	25.513	0.745763	0.998069	CHX-Puro	1	0.862157	6	27.5438
5	8	25.5148	0.940789	0.995365	NoPuro	3	1.08996	6	27.5438
6	4	25.6217	0.76087	1.00001	EMT-Puro	3	0.924324	6	27.5438
7	10	25.6515	1.02685	0.996991	EMT-Puro	2	0.963671	6	27.5438
17	9	25.7198	0.597403	1.00157	EMT-Puro	1	0.875745	6	27.5438
7	3	25.7292	1.21429	0.985	EMT-Puro	4	0.968881	6	27.5438
11	3.2	25.7564	0.943231	0.987793	NoPuro	1	1.07531	6	27.5438
11	3.1	25.7564	0.820513	0.997359	NoPuro	1	1.04368	6	27.5438
6	2	25.8833	0.778443	0.997748	NoPuro	2	1.01091	6	27.5438
5	3	25.8987	1.13208	0.998022	Puro	1	0.906004	6	27.5438
5	9	25.9268	1.05179	1.00785	NoPuro	3	1.07793	6	27.5438
7	5	25.9454	1	1.00775	Puro	3	0.99852	6	27.5438
8	2	26.0142	0.989011	0.992841	CHX-Puro	3	1.00191	6	27.5438
6	5	26.0268	0.792453	0.997061	EMT-Puro	3	0.916972	6	27.5438
11	4	26.0292	1.13684	0.993191	NoPuro	1	1.06263	6	27.5438
8	1	26.1185	1.125	0.9954	EMT-Puro	2	0.941784	6	27.5438
5	9	26.141	1.25	0.9955	CHX-Puro	2	1.05415	6	27.5438
6	3	26.2675	0.464286	0.994061	NoPuro	2	0.946229	6	27.5438
5	4	26.2967	1.27389	0.995981	Puro	1	0.976789	6	27.5438
11	5	26.306	1.10526	0.988779	NoPuro	1	1.08398	6	27.5438
6	1	26.3613	1.20755	0.982257	NoPuro	3	1.07566	6	27.5438
18	2	26.388	1.48387	1.00317	EMT-Puro	1	0.94903	6	27.5438
8	3	26.4251	1.10769	0.988546	CHX-Puro	3	1.00191	6	27.5438
8	2.2	26.5084	1.06719	1.01229	EMT-Puro	2	0.925598	6	27.5438
8	2.1	26.5084	1.58537	1.00499	EMT-Puro	2	1.00342	6	27.5438
5	10	26.5721	0.671233	0.995201	CHX-Puro	2	1.01579	6	27.5438
11	6	26.5802	0.969305	0.994765	NoPuro	1	1.05812	6	27.5438
6	4	26.671	1.55144	1.00043	NoPuro	2	0.961254	6	27.5438
18	3	26.6875	0.652482	0.986892	EMT-Puro	1	0.924668	6	27.5438
7	5	26.7363	1.02857	1.0057	EMT-Puro	4	0.984309	6	27.5438
6	2	26.7396	0.804469	0.9968	NoPuro	3	1.04654	6	27.5438
10	4	26.8247	1.07784	0.99913	CHX-Puro	1	0.892097	6	27.5438
11	7	26.854	0.893023	0.9917	NoPuro	1	1.03601	6	27.5438
8	3.2	26.8963	1.16592	1.00054	EMT-Puro	2	1.04379	6	27.5438
8	3.1	26.8963	1.00559	0.999075	EMT-Puro	2	0.99422	6	27.5438
7	6	26.9136	1.08642	1.01226	Puro	3	1.00611	6	27.5438
5	11	26.9761	1.18462	0.98074	CHX-Puro	2	1.04092	6	27.5438
18	4	26.9797	1.27778	1.00927	EMT-Puro	1	0.978252	6	27.5438
6	5	27.086	1.03571	0.991805	NoPuro	2	0.971968	6	27.5438
11	8.2	27.1272	1.10983	0.993022	NoPuro	1	0.96317	6	27.5438
11	8.1	27.1272	0.742747	0.990981	NoPuro	1	0.957682	6	27.5438
7	6	27.138	0.84	1.00219	EMT-Puro	4	0.948309	6	27.5438
18	5	27.2668	1.26027	0.998106	EMT-Puro	1	1.02816	6	27.5438
8	4	27.2945	1.06875	0.989489	CHX-Puro	3	1.01878	6	27.5438
6	6	27.3238	1.08247	1.00152	EMT-Puro	3	0.904529	6	27.5438
11	9	27.4116	0.753532	0.991578	NoPuro	1	0.950102	6	27.5438
6	1	27.4434	0.893617	0.994734	CHX-Puro	2	1.00262	6	27.5438
6	6	27.5236	1.08475	0.992672	NoPuro	2	0.952047	6	27.5438
18	6	27.5378	0.866667	0.992997	EMT-Puro	1	1.00834	6	27.5438
6	4	27.5497	1.2071	0.992668	NoPuro	3	1.06914	6	27.5438
3	7	27.6177	0.947368	0.966209	Puro	2	0.923992	6	27.5438
8	5	27.6899	0.542169	0.995345	CHX-Puro	3	0.953722	6	27.5438
12	1	27.7287	0.884211	0.99033	NoPuro	1	0.935849	6	27.5438
6	7	27.7447	0.844828	0.988991	EMT-Puro	3	0.924496	6	27.5438
18	7	27.7832	1.34167	0.963118	EMT-Puro	1	1.06689	6	27.5438
8	4	27.8762	0.439024	0.993865	EMT-Puro	2	1.0386	6	27.5438
5	5	27.8894	1.26126	0.976125	Puro	1	1.001	6	27.5438
6	5	27.9552	0.847059	0.989462	NoPuro	3	1.03988	6	27.5438
6	7	27.958	0.952381	0.996233	NoPuro	2	0.961571	6	27.5438
12	2	28.0269	0.941176	0.964874	NoPuro	1	0.935644	6	27.5438
3	8	28.0456	1.27869	0.998357	Puro	2	1.00268	6	27.5438
18	8	28.0463	0.938776	1.01467	EMT-Puro	1	1.05077	6	27.5438
7	8	28.2321	1.43182	0.989762	EMT-Puro	4	1.03013	6	27.5438
8	5	28.2813	1.14894	0.994475	EMT-Puro	2	1.07042	6	27.5438
6	3	28.2892	1.11465	1.00111	CHX-Puro	2	1.00262	6	27.5438
12	3.1	28.2952	1.12821	0.996006	NoPuro	1	0.966413	6	27.5438
12	3.2	28.2952	1.36245	0.980291	NoPuro	1	0.988973	6	27.5438
18	9	28.3473	0.597403	1.00226	EMT-Puro	1	0.995509	6	27.5438
3	9	28.4352	0.769231	1.0125	Puro	2	0.987296	6	27.5438
6	9	28.543	0.806452	1.00665	EMT-Puro	3	0.901032	6	27.5438
12	4	28.5454	1.06105	0.992739	NoPuro	1	0.984552	6	27.5438
7	9	28.6403	1.19118	0.98748	EMT-Puro	4	1.03344	6	27.5438
10	6	28.6742	1.12598	0.996153	CHX-Puro	1	0.915807	6	27.5438
6	4	28.7386	1.03279	1.00294	CHX-Puro	2	1.0141	6	27.5438
6	9	28.7692	1.01746	1.00177	NoPuro	2	0.954842	6	27.5438
7	7	28.7704	1.09474	1.00305	Puro	3	1.0368	6	27.5438
8	6	28.8092	1.23077	0.997114	CHX-Puro	3	1.02295	6	27.5438
12	5	28.8287	0.710526	0.991512	NoPuro	1	0.958675	6	27.5438
3	10	28.8546	1.22449	0.997846	Puro	2	0.999541	6	27.5438
6	6	28.9453	1.30693	0.996695	NoPuro	3	1.07826	6	27.5438
5	6	28.99	1.56863	1.00086	Puro	1	1.05877	6	27.5438
19	2	29.0131	0.989247	0.997938	EMT-Puro	1	1.00056	6	27.5438
7	10	29.0273	1.10727	1.00296	EMT-Puro	4	1.04382	6	27.5438
12	6	29.0938	0.969305	1.01545	NoPuro	1	0.966303	6	27.5438
10	7	29.1016	0.95122	0.99286	CHX-Puro	1	0.930138	6	27.5438
6	5	29.1282	0.61165	0.998227	CHX-Puro	2	0.980115	6	27.5438
8	7	29.211	0.818182	0.998952	EMT-Puro	2	1.06093	6	27.5438
8	7.2	29.2121	1.46739	1.01476	CHX-Puro	3	1.03137	6	27.5438
8	7.1	29.2121	0.418605	0.995412	CHX-Puro	3	1.00202	6	27.5438
7	8	29.2529	1.39394	1.00715	Puro	3	1.05467	6	27.5438
19	3	29.2927	1.14184	0.9845	EMT-Puro	1	1.055	6	27.5438
6	11	29.3498	0.767123	0.999456	EMT-Puro	3	0.863027	6	27.5438
6	7	29.3574	0.991803	1.00655	NoPuro	3	0.993913	6	27.5438
12	7	29.3616	1.11628	0.978553	NoPuro	1	1.00366	6	27.5438
5	7.2	29.4271	0.686275	0.990038	Puro	1	1.0495	6	27.5438
5	7.1	29.4271	1.08374	1.00009	Puro	1	1.0691	6	27.5438
10	8	29.4922	0.325	0.991563	CHX-Puro	1	0.854853	6	27.5438
6	6	29.5481	0.954545	0.98882	CHX-Puro	2	0.967388	6	27.5438
7	1	29.5586	0.777778	0.971642	NoPuro	2	0.956429	6	27.5438
19	4	29.5774	1.06481	1.00435	EMT-Puro	1	1.0131	6	27.5438
8	8	29.592	0.830769	1.03184	EMT-Puro	2	1.02128	6	27.5438
8	8	29.5946	0.868966	0.994371	CHX-Puro	3	1.00654	6	27.5438
12	8.1	29.6332	1.34623	0.987167	NoPuro	1	1.04905	6	27.5438
12	8.2	29.6332	0.971098	0.996525	NoPuro	1	0.989783	6	27.5438
6	12	29.727	0.875472	0.991395	EMT-Puro	3	0.867647	6	27.5438
6	8	29.7714	1.30263	1.00005	NoPuro	3	1.02913	6	27.5438
5	8	29.8214	1.26316	0.997022	Puro	1	1.09699	6	27.5438
19	5	29.8569	1.44932	1.00291	EMT-Puro	1	1.09278	6	27.5438
10	9	29.9004	1.24551	0.999487	CHX-Puro	1	0.877042	6	27.5438
7	11	29.9015	1.06061	0.994832	EMT-Puro	4	1.07412	6	27.5438
12	9	29.9196	0.791209	0.991383	NoPuro	1	1.03975	6	27.5438
6	7	29.9243	0.75	0.997697	CHX-Puro	2	0.942388	6	27.5438
8	9	29.9943	0.882353	0.98869	CHX-Puro	3	0.962425	6	27.5438
8	9.2	30.0142	1.17391	0.997383	EMT-Puro	2	1.03599	6	27.5438
8	9.1	30.0142	1.09091	1.00253	EMT-Puro	2	1.03258	6	27.5438
19	6	30.1355	0.933333	0.986026	EMT-Puro	1	1.05833	7	32.3674
13	1	30.2414	0.757895	0.978031	NoPuro	1	1.02142	7	32.3674
6	13	30.2661	0.731707	1.05482	EMT-Puro	3	0.850643	7	32.3674
7	9	30.2748	1.11392	0.966842	Puro	3	1.05647	7	32.3674
11	1	30.2792	0.592593	1.00247	CHX-Puro	1	0.872887	7	32.3674
6	8	30.2987	0.937908	0.994524	CHX-Puro	2	0.940101	7	32.3674
8	1.2	30.3636	0.957447	0.992077	EMT-Puro	4	1.06455	7	32.3674
8	1.1	30.3636	0.925714	0.980176	EMT-Puro	4	1.05426	7	32.3674
8	1.3	30.3636	0.928571	1.01061	EMT-Puro	4	1.06855	7	32.3674
19	7	30.3841	0.766667	0.97057	EMT-Puro	1	1.00897	7	32.3674
3	11	30.4111	0.566038	0.992219	Puro	2	0.965578	7	32.3674
8	10	30.4513	1.32886	0.993499	EMT-Puro	2	1.05875	7	32.3674
13	2	30.522	0.727273	0.974853	NoPuro	1	0.981331	7	32.3674
19	8	30.653	0.657143	1.0036	EMT-Puro	1	0.988021	7	32.3674
7	10	30.6558	0.657534	1.00211	Puro	3	1.00269	7	32.3674
7	2	30.6688	1.16766	0.992007	NoPuro	2	0.977435	7	32.3674
6	9	30.6903	0.833333	0.992974	CHX-Puro	2	0.898434	7	32.3674
6	1	30.7029	1.28788	1.00593	Puro	1	1.10999	7	32.3674
7	1	30.756	1.05459	0.97166	EMT-Puro	3	0.884673	7	32.3674
6	9	30.7705	0.657371	0.949249	NoPuro	3	1.03175	7	32.3674
13	3.1	30.7903	1.4359	1.0001	NoPuro	1	0.988676	7	32.3674
13	3.2	30.7903	1.04803	0.985859	NoPuro	1	0.987375	7	32.3674
8	10	30.804	0.786408	0.909109	CHX-Puro	3	0.936211	7	32.3674
9	1	30.9353	1.05	0.997334	EMT-Puro	2	1.00521	7	32.3674
19	9	30.9428	0.298701	1.01565	EMT-Puro	1	0.883724	7	32.3674
11	2	31.0354	0.80791	0.983349	CHX-Puro	1	0.856178	7	32.3674
13	4	31.04	0.884211	0.988619	NoPuro	1	1.00474	7	32.3674
7	11	31.0528	1.28736	1.0007	Puro	3	1.03142	7	32.3674
7	3	31.0583	1.08333	0.990373	NoPuro	2	0.991324	7	32.3674
6	10	31.1168	0.863014	1.00111	CHX-Puro	2	0.917612	7	32.3674
6	2	31.1207	0.903226	0.997719	Puro	1	1.11698	7	32.3674
7	2	31.1467	1	0.999374	EMT-Puro	3	0.871596	7	32.3674
8	3	31.1818	0.857143	0.990252	EMT-Puro	4	1.03283	7	32.3674
7	1	31.2161	0.754717	0.971089	NoPuro	3	1.01314	7	32.3674
13	5	31.3152	0.552632	1.01626	NoPuro	1	0.963076	7	32.3674
9	2.1	31.3248	1.09756	0.99501	EMT-Puro	2	0.984772	7	32.3674
9	2.2	31.3248	0.869565	0.994774	EMT-Puro	2	0.991608	7	32.3674
7	4	31.4696	0.962963	0.985429	NoPuro	2	1.00978	7	32.3674
8	1	31.4839	1.16667	1.00197	Puro	3	1.06059	7	32.3674
6	11	31.5175	0.969231	1.01863	CHX-Puro	2	0.896074	7	32.3674
6	3	31.5258	0.943396	0.997348	Puro	1	1.14035	7	32.3674
7	3	31.5676	0.807692	1.0006	EMT-Puro	3	0.876279	7	32.3674
13	6	31.5894	0.659128	0.941817	NoPuro	1	0.91736	7	32.3674
7	2	31.596	0.804469	0.985255	NoPuro	3	0.98841	7	32.3674
20	2	31.6204	0.741935	0.994534	EMT-Puro	1	0.86404	7	32.3674
9	3.1	31.6983	1.11732	1.00113	EMT-Puro	2	1.0526	7	32.3674
9	3.2	31.6983	1.21076	0.995598	EMT-Puro	2	1.05878	7	32.3674
11	4	31.8327	0.790419	0.9768	CHX-Puro	1	0.810669	7	32.3674
8	2	31.8574	0.875	1.00032	Puro	3	1.10523	7	32.3674
13	7	31.861	1.00465	0.9919	NoPuro	1	0.920716	7	32.3674
20	3	31.902	1.08747	0.987672	EMT-Puro	1	0.913047	7	32.3674
6	4	31.9318	0.89172	1.00072	Puro	1	1.11632	7	32.3674
7	4	31.9599	1.1413	0.998037	EMT-Puro	3	0.911164	7	32.3674
7	1	31.9871	1.2766	0.994016	CHX-Puro	2	0.934371	7	32.3674
4	1	32.0096	0.882353	0.998521	Puro	2	0.971461	7	32.3674
13	8.2	32.1385	0.277457	0.998956	NoPuro	1	0.813839	7	32.3674
13	8.1	32.1385	0.696325	0.993012	NoPuro	1	0.80435	7	32.3674
20	4	32.1901	0.638889	0.995664	EMT-Puro	1	0.878011	7	32.3674
8	5	32.219	0.977143	1.02186	EMT-Puro	4	1.02769	7	32.3674
8	3	32.2545	1.28571	1.0003	Puro	3	1.09613	7	32.3674
9	2	32.2738	1.08791	0.972233	CHX-Puro	3	0.946101	7	32.3674
7	5	32.3136	1.07143	1.00796	NoPuro	2	1.07049	7	32.3674
6	5	32.3496	0.810811	0.997128	Puro	1	1.07001	7	32.3674
7	5	32.3851	1.0566	0.995509	EMT-Puro	3	0.908577	7	32.3674
7	4	32.4139	1.27811	0.998189	NoPuro	3	0.995466	7	32.3674
4	2	32.4157	0.434783	0.998686	Puro	2	0.8932	7	32.3674
13	9	32.4227	0.828885	0.99597	NoPuro	1	0.811449	7	32.3674
20	5	32.466	0.882192	1.00615	EMT-Puro	1	0.852046	7	32.3674
9	4	32.6255	0.658537	0.993896	EMT-Puro	2	1.04282	7	32.3674
8	4	32.6665	0.893023	0.988229	Puro	3	1.08543	7	32.3674
9	3	32.6911	0.830769	1.00087	CHX-Puro	3	0.918409	7	32.3674
14	1	32.7359	0.631579	0.975217	NoPuro	1	0.80188	7	32.3674
6	6	32.7557	0.980392	0.990878	Puro	1	1.04192	7	32.3674
20	6	32.7578	0.983333	0.99218	EMT-Puro	1	0.843898	7	32.3674
7	6	32.7671	0.793814	0.978347	EMT-Puro	3	0.903475	7	32.3674
7	6	32.7724	0.813559	0.998171	NoPuro	2	0.996702	7	32.3674
7	5	32.8348	0.705882	0.992739	NoPuro	3	0.985607	7	32.3674
8	6	32.9934	1.2	0.99423	EMT-Puro	4	1.06369	7	32.3674
14	2	33.0064	0.898396	0.980177	NoPuro	1	0.74813	7	32.3674
20	7	33.0087	0.575	0.966671	EMT-Puro	1	0.756466	7	32.3674
11	6	33.0666	1.22835	0.992672	CHX-Puro	1	0.889059	7	32.3674
8	5	33.1216	0.722222	0.99721	Puro	3	1.04901	7	32.3674
7	7	33.1818	1.02586	0.988177	EMT-Puro	3	0.925416	7	32.3674
7	7	33.2051	1.04762	0.995555	NoPuro	2	0.997893	7	32.3674
14	3.2	33.2795	0.524017	0.980162	NoPuro	1	0.730384	7	32.3674
14	3.1	33.2795	1.23077	0.999074	NoPuro	1	0.766403	7	32.3674
7	6	33.2805	1.18812	0.991429	NoPuro	3	0.983709	7	32.3674
20	8	33.2812	1.12653	1.00758	EMT-Puro	1	0.775786	7	32.3674
9	4	33.2995	0.95625	0.995058	CHX-Puro	3	0.907159	7	32.3674
11	7	33.4615	0.95122	0.991136	CHX-Puro	1	0.909604	7	32.3674
14	4	33.5335	1.06105	0.990245	NoPuro	1	0.781226	7	32.3674
20	9	33.574	0.896104	1.01215	EMT-Puro	1	0.78873	7	32.3674
7	3	33.5753	1.02548	1.00342	CHX-Puro	2	0.925454	7	32.3674
8	6	33.5966	0.987654	0.993014	Puro	3	1.0383	7	32.3674
9	5	33.677	0.861702	0.963679	EMT-Puro	2	1.04591	7	32.3674
9	5	33.697	0.86747	0.99634	CHX-Puro	3	0.939689	7	32.3674
8	8	33.7847	1.84091	1.01484	EMT-Puro	4	1.1046	7	32.3674
14	5	33.8147	1.26316	0.994171	NoPuro	1	0.841629	7	32.3674
6	7.2	33.8888	0.588235	0.977595	Puro	1	0.943884	7	32.3674
6	7.1	33.8888	1.08374	1.00715	Puro	1	0.993434	7	32.3674
7	9	33.9694	1.22581	1.00482	EMT-Puro	3	0.971285	7	32.3674
8	7	33.9968	0.673684	0.994626	Puro	3	0.966278	7	32.3674
7	9	34.0278	0.957606	1.00402	NoPuro	2	0.985179	7	32.3674
11	8	34.0789	0.975	0.986089	CHX-Puro	1	0.89932	7	32.3674
14	6	34.081	1.00808	0.965679	NoPuro	1	0.841972	7	32.3674
7	7	34.1788	0.631148	0.986912	NoPuro	3	0.962118	7	32.3674
8	9	34.1844	0.893382	0.981617	EMT-Puro	4	1.07482	7	32.3674
21	2	34.2399	0.247312	0.999663	EMT-Puro	1	0.747747	7	32.3674
14	7	34.3429	1.22791	0.975749	NoPuro	1	0.937017	7	32.3674
11	9	34.4849	0.934132	1.00044	CHX-Puro	1	0.880135	7	32.3674
8	1	34.4947	1.16667	0.979725	NoPuro	2	1.00661	7	32.3674
7	4	34.4949	0.765027	0.990797	CHX-Puro	2	0.898678	7	32.3674
21	3	34.5147	1.19622	0.998028	EMT-Puro	1	0.837498	7	32.3674
9	6	34.5503	1	1.00832	CHX-Puro	3	0.916612	7	32.3674
8	10	34.5685	1.10727	1.0036	EMT-Puro	4	1.07482	7	32.3674
7	8	34.5934	0.904605	0.999975	NoPuro	3	0.921885	7	32.3674
14	8.2	34.6161	1.66474	0.999654	NoPuro	1	1.04846	7	32.3674
14	8.1	34.6161	0.974855	0.984817	NoPuro	1	0.96487	7	32.3674
21	4	34.7922	1.06481	0.994569	EMT-Puro	1	0.869786	7	32.3674
12	1	34.8744	1.18519	0.998822	CHX-Puro	1	0.903531	7	32.3674
14	9	34.9101	0.979592	0.995462	NoPuro	1	1.08326	7	32.3674
8	8	34.9463	1.33333	0.992747	Puro	3	0.988219	7	32.3674
9	7.2	34.9601	0.684783	0.991753	CHX-Puro	3	0.94323	7	32.3674
9	7.1	34.9601	1.88372	1.00128	CHX-Puro	3	0.984863	7	32.3674
8	11	34.9719	0.681818	0.994937	EMT-Puro	4	1.03694	7	32.3674
7	9	35.0042	1.13944	1.00845	NoPuro	3	0.936649	7	32.3674
21	5	35.0776	0.819178	0.998762	EMT-Puro	1	0.842957	8	37.4028
4	4	35.2077	1.05882	0.998895	Puro	2	0.903284	8	37.4028
9	7	35.2096	0.981818	1.01545	EMT-Puro	2	1.0267	8	37.4028
15	1	35.2244	1.38947	0.983299	NoPuro	1	1.13236	8	37.4028
7	5	35.2539	1.15534	0.995259	CHX-Puro	2	0.953047	8	37.4028
12	2	35.2635	0.870056	0.994056	CHX-Puro	1	0.958037	8	37.4028
8	9	35.3277	0.810127	1.00212	Puro	3	1.00348	8	37.4028
9	8	35.3437	0.868966	0.99388	CHX-Puro	3	0.984863	8	37.4028
21	6	35.3636	0.916667	0.974145	EMT-Puro	1	0.870735	8	37.4028
8	1	35.443	1.20755	0.988319	NoPuro	3	0.927141	8	37.4028
9	1.3	35.4519	0.857143	0.990697	EMT-Puro	4	1.0438	8	37.4028
9	1.2	35.4519	1.14894	0.984026	EMT-Puro	4	1.05095	8	37.4028
9	1.1	35.4519	0.874286	0.996891	EMT-Puro	4	1.02862	8	37.4028
6	8	35.4864	0.736842	0.980967	Puro	1	0.94894	8	37.4028
15	2	35.4997	0.855615	0.979307	NoPuro	1	1.09485	8	37.4028
9	8	35.5896	0.415385	1.01823	EMT-Puro	2	0.959151	8	37.4028
21	7	35.6165	0.383333	0.962085	EMT-Puro	1	0.820849	8	37.4028
7	11	35.6201	1.20548	0.995674	EMT-Puro	3	1.00429	8	37.4028
4	5	35.6335	0.87931	0.976677	Puro	2	0.908456	8	37.4028
7	6	35.6674	1.11364	0.998904	CHX-Puro	2	0.968956	8	37.4028
8	10	35.7098	0.986301	0.993856	Puro	3	0.973373	8	37.4028
9	9	35.7498	1.05882	0.989514	CHX-Puro	3	1.00251	8	37.4028
15	3.2	35.7675	0.733624	0.984795	NoPuro	1	1.09176	8	37.4028
15	3.1	35.7675	0.820513	0.991104	NoPuro	1	1.1245	8	37.4028
8	2	35.8219	0.603352	0.985546	NoPuro	3	0.921739	8	37.4028
21	8	35.8838	1.03265	1.00444	EMT-Puro	1	0.825781	8	37.4028
8	2	35.9231	0.934132	0.993352	NoPuro	2	0.998275	8	37.4028
7	12	35.9956	0.935849	0.986204	EMT-Puro	3	1.0247	8	37.4028
15	4	36.0146	0.833684	0.984634	NoPuro	1	1.04881	8	37.4028
7	7	36.0457	1	1.00235	CHX-Puro	2	0.993956	8	37.4028
12	4	36.0458	0.862275	0.969033	CHX-Puro	1	0.919714	8	37.4028
4	6	36.0801	0.956522	0.993618	Puro	2	0.899761	8	37.4028
8	11	36.101	0.643678	0.998739	Puro	3	0.921074	8	37.4028
9	10	36.1253	1.13592	0.952733	CHX-Puro	3	1.03746	8	37.4028
21	9	36.1703	0.896104	1.02005	EMT-Puro	1	0.857891	8	37.4028
9	9.1	36.1888	0.681818	1.00742	EMT-Puro	2	0.894447	8	37.4028
9	9.2	36.1888	0.782609	1.00276	EMT-Puro	2	0.867708	8	37.4028
9	3	36.2683	1.14286	0.984619	EMT-Puro	4	1.07237	8	37.4028
15	5	36.2937	0.868421	0.986066	NoPuro	1	1.03484	8	37.4028
8	3	36.3089	0.928571	0.986005	NoPuro	2	1.01335	8	37.4028
7	13	36.3767	0.878049	1.00458	EMT-Puro	3	1.00705	8	37.4028
7	8	36.4293	0.754902	0.9867	CHX-Puro	2	0.975656	8	37.4028
4	7	36.5162	1.15789	0.988734	Puro	2	0.920813	8	37.4028
9	1	36.5215	1	0.995107	Puro	3	0.933574	8	37.4028
15	6	36.5573	0.736672	0.981192	NoPuro	1	0.985719	8	37.4028
9	10	36.613	0.966443	1.00488	EMT-Puro	2	0.877395	8	37.4028
8	4	36.6452	0.781065	0.996472	NoPuro	3	0.924374	8	37.4028
8	4	36.7342	0.909465	0.982232	NoPuro	2	0.987534	8	37.4028
7	9	36.8177	0.833333	0.99754	CHX-Puro	2	0.975656	8	37.4028
15	7	36.8321	0.893023	1.00363	NoPuro	1	0.977536	8	37.4028
22	2	36.8451	1.23656	0.989745	EMT-Puro	1	0.868894	8	37.4028
8	1	36.8558	0.79476	1.00988	EMT-Puro	3	0.986522	8	37.4028
12	6	36.8563	0.92126	0.991592	CHX-Puro	1	0.95258	8	37.4028
9	2	36.8984	1.3125	0.999577	Puro	3	0.936252	8	37.4028
4	8	36.9515	0.688525	0.995166	Puro	2	0.861797	8	37.4028
8	5	37.0502	1.41176	0.986045	NoPuro	3	0.985103	8	37.4028
10	1	37.0874	0.6	0.988604	EMT-Puro	2	0.827639	8	37.4028
15	8.2	37.1139	1.80347	0.993264	NoPuro	1	0.991409	8	37.4028
15	8.1	37.1139	1.11412	0.98804	NoPuro	1	1.00486	8	37.4028
22	3	37.1199	1.14184	0.989761	EMT-Puro	1	0.893468	8	37.4028
8	5	37.1482	0.892857	1.00108	NoPuro	2	0.968487	8	37.4028
8	2	37.2469	1.07143	0.992503	EMT-Puro	3	1.0129	8	37.4028
12	7	37.2517	0.634146	0.986445	CHX-Puro	1	0.935204	8	37.4028
7	1	37.2651	1.13636	1.00118	Puro	1	0.936261	8	37.4028
10	2	37.2776	1.18681	0.955876	CHX-Puro	3	1.04735	8	37.4028
9	3	37.2943	0.714286	0.990377	Puro	3	0.918379	8	37.4028
4	9	37.3442	1.07692	1.00333	Puro	2	0.892566	8	37.4028
15	9	37.3998	1.09262	0.994859	NoPuro	1	0.975176	8	37.4028
22	4	37.4028	0.496914	0.999371	EMT-Puro	1	0.918428	8	37.4028
10	2.1	37.478	0.487805	0.989748	EMT-Puro	2	0.764688	8	37.4028
10	2.2	37.478	0.948617	0.985018	EMT-Puro	2	0.738473	8	37.4028
12	8	37.6525	1.625	0.9908	CHX-Puro	1	1.01866	8	37.4028
8	3	37.6669	0.807692	0.99894	EMT-Puro	3	0.979534	8	37.4028
7	10	37.6711	1.34247	0.992495	CHX-Puro	2	1.0236	8	37.4028
22	5	37.6872	1.00822	1.00778	EMT-Puro	1	0.899629	8	37.4028
10	3	37.6996	1.10769	0.989184	CHX-Puro	3	1.07504	8	37.4028
9	4	37.7063	0.55814	0.966932	Puro	3	0.90197	8	37.4028
16	1	37.7136	1.38947	0.9955	NoPuro	1	1.02856	8	37.4028
4	10	37.7658	0.857143	1.00065	Puro	2	0.855831	8	37.4028
8	6	37.8024	1.08475	0.989562	NoPuro	2	0.980665	8	37.4028
10	3.2	37.85	0.717489	0.993623	EMT-Puro	2	0.744369	8	37.4028
10	3.1	37.85	0.893855	0.997963	EMT-Puro	2	0.747584	8	37.4028
8	6	37.8658	0.831683	0.991073	NoPuro	3	0.940461	8	37.4028
22	6	37.9626	0.983333	1.00044	EMT-Puro	1	0.89148	8	37.4028
16	2	37.9922	0.770053	0.978802	NoPuro	1	1.02352	8	37.4028
12	9	38.0543	1.08982	0.995685	CHX-Puro	1	1.00481	8	37.4028
8	4	38.0633	0.684783	0.999866	EMT-Puro	3	0.942352	8	37.4028
7	11	38.075	1.07692	1.01068	CHX-Puro	2	1.03437	8	37.4028
10	4	38.0887	0.5625	0.997911	CHX-Puro	3	1.03567	8	37.4028
9	5	38.1683	1	0.988655	Puro	3	0.903205	8	37.4028
22	7	38.2121	0.958333	0.96083	EMT-Puro	1	0.905396	8	37.4028
9	5	38.2405	1.33714	0.978437	EMT-Puro	4	1.10837	8	37.4028
8	7	38.2417	1.14286	0.997569	NoPuro	2	0.987808	8	37.4028
10	4	38.2464	0.658537	0.994383	EMT-Puro	2	0.715256	8	37.4028
16	3.1	38.2632	0.923077	0.985302	NoPuro	1	1.04246	8	37.4028
16	3.2	38.2632	0.524017	0.983627	NoPuro	1	1.01149	8	37.4028
8	7	38.2885	1.2623	1.0045	NoPuro	3	0.996102	8	37.4028
13	1	38.4453	1.33333	0.997629	CHX-Puro	1	1.04302	8	37.4028
8	5	38.4678	1.51887	0.998927	EMT-Puro	3	1.01486	8	37.4028
22	8	38.4724	0.657143	1.0031	EMT-Puro	1	0.879444	8	37.4028
7	2	38.4985	0.83871	0.995537	Puro	1	0.891344	8	37.4028
16	4	38.5123	1.01053	0.987428	NoPuro	1	1.02571	8	37.4028
10	5	38.5179	1.51807	0.994315	CHX-Puro	3	1.10073	8	37.4028
10	5	38.6457	1.14894	0.992016	EMT-Puro	2	0.788611	8	37.4028
8	8	38.7014	0.832237	0.997446	NoPuro	3	0.960514	8	37.4028
22	9	38.7732	0.896104	1.01698	EMT-Puro	1	0.930721	8	37.4028
16	5	38.801	0.947368	0.992958	NoPuro	1	1.04677	8	37.4028
13	2	38.8215	0.99435	1.00041	CHX-Puro	1	1.04496	8	37.4028
9	6	38.8493	0.84	0.995933	EMT-Puro	4	1.07237	8	37.4028
8	6	38.8589	0.938144	0.983677	EMT-Puro	3	1.00609	8	37.4028
7	3	38.9184	1.88679	1.00291	Puro	1	0.989701	8	37.4028
16	6	39.0597	1.04685	0.97174	NoPuro	1	1.06216	8	37.4028
8	9	39.1262	0.701195	1.01521	NoPuro	3	0.967519	8	37.4028
4	11	39.16	1.13208	0.971423	Puro	2	0.912435	8	37.4028
9	6	39.2369	1.11934	1.00765	Puro	3	0.947771	8	37.4028
8	7	39.2746	1.2069	1.00039	EMT-Puro	3	1.00419	8	37.4028
7	4	39.3224	0.955414	0.99781	Puro	1	0.990902	8	37.4028
16	7	39.3255	1.22791	0.963894	NoPuro	1	1.0046	8	37.4028
10	6	39.3692	1.15385	0.985125	CHX-Puro	3	1.11611	8	37.4028
8	9	39.3732	0.987531	0.99781	NoPuro	2	1.00521	8	37.4028
23	2	39.4367	0	0.994361	EMT-Puro	1	0.827455	8	37.4028
9	1	39.5621	0.981132	0.974473	NoPuro	3	0.975171	8	37.4028
10	7	39.5812	1.47273	0.993321	EMT-Puro	2	0.867702	8	37.4028
13	4	39.6012	0.790419	0.978323	CHX-Puro	1	1.03058	8	37.4028
16	8.2	39.6057	1.52601	0.996836	NoPuro	1	1.06187	8	37.4028
16	8.1	39.6057	1.25338	0.991847	NoPuro	1	1.01853	8	37.4028
9	8	39.6209	0.613636	0.987956	EMT-Puro	4	0.949647	8	37.4028
9	7	39.6461	0.673684	0.986455	Puro	3	0.881806	8	37.4028
23	3	39.7175	0.706856	0.988987	EMT-Puro	1	0.808531	8	37.4028
7	5	39.7369	0.900901	0.999674	Puro	1	0.99182	8	37.4028
10	7.1	39.7662	1.46512	0.985219	CHX-Puro	3	1.1036	8	37.4028
10	7.2	39.7662	0.978261	0.998472	CHX-Puro	3	1.14546	8	37.4028
9	1	39.8693	0.888889	0.997765	NoPuro	2	0.989332	8	37.4028
16	9	39.8943	1.39403	0.996655	NoPuro	1	1.06232	8	37.4028
9	2	39.935	1.00559	0.993584	NoPuro	3	0.961786	8	37.4028
10	8	39.9638	0.553846	0.9804	EMT-Puro	2	0.844825	8	37.4028
23	4	40.0018	0.425926	1.01206	EMT-Puro	1	0.727467	8	37.4028
9	9	40.0435	0.926471	0.983863	EMT-Puro	4	0.952956	9	42.2444
8	9	40.0602	0.806452	1.00519	EMT-Puro	3	0.964292	9	42.2444
7	6	40.1509	1.56863	0.995351	Puro	1	1.0676	9	42.2444
10	8	40.1584	1.05517	0.998412	CHX-Puro	3	1.12222	9	42.2444
17	1	40.2114	0.757895	0.973259	NoPuro	1	1.06111	9	42.2444
9	2	40.2685	0.856287	1.0001	NoPuro	2	0.9792	9	42.2444
23	5	40.2936	0.252055	0.958487	EMT-Puro	1	0.638488	9	42.2444
9	10	40.4392	0.865052	0.997886	EMT-Puro	4	0.928734	9	42.2444
17	2	40.4877	0.812834	0.983564	NoPuro	1	1.05008	9	42.2444
23	6	40.5784	0.966667	0.975712	EMT-Puro	1	0.685464	9	42.2444
7	7.2	40.5885	0.980392	0.997877	Puro	1	1.06268	9	42.2444
7	7.1	40.5885	1.03448	0.975899	Puro	1	1.07301	9	42.2444
9	3	40.6553	1.08333	0.991951	NoPuro	2	0.970867	9	42.2444
8	1	40.6813	0.765957	0.994255	CHX-Puro	2	0.983306	9	42.2444
10	9.2	40.7148	0.913043	1.00147	EMT-Puro	2	0.839485	9	42.2444
10	9.1	40.7148	1.22727	1.00267	EMT-Puro	2	0.902213	9	42.2444
5	1	40.7431	1.35294	0.999433	Puro	2	0.959494	9	42.2444
17	3.1	40.755	1.02564	0.993261	NoPuro	1	1.10025	9	42.2444
17	3.2	40.755	0.838428	0.989011	NoPuro	1	1.08304	9	42.2444
9	8	40.7585	1.27273	0.997549	Puro	3	0.928066	9	42.2444
23	7	40.8281	0.766667	0.954238	EMT-Puro	1	0.661308	9	42.2444
8	11	40.8658	1.0411	0.988918	EMT-Puro	3	0.974817	9	42.2444
10	9	40.8722	0.529412	0.980885	CHX-Puro	3	1.06928	9	42.2444
7	8	40.9925	1.36842	0.994881	Puro	1	1.14069	9	42.2444
17	4	41.009	1.13684	0.986126	NoPuro	1	1.10198	9	42.2444
23	8	41.0953	0.37551	1.01075	EMT-Puro	1	0.600526	9	42.2444
9	9	41.1396	0.810127	1.02452	Puro	3	0.910448	9	42.2444
5	2	41.1481	1.30435	1.00015	Puro	2	1.04645	9	42.2444
10	10	41.1482	0.785235	0.99559	EMT-Puro	2	0.931956	9	42.2444
8	12	41.2448	1.02642	0.994481	EMT-Puro	3	0.989653	9	42.2444
10	10	41.2475	0.61165	0.949907	CHX-Puro	3	1.01685	9	42.2444
17	5	41.2923	0.947368	0.990218	NoPuro	1	1.09203	9	42.2444
9	11	41.3251	1.21212	0.992742	EMT-Puro	4	0.981764	9	42.2444
9	4	41.3417	1.01646	0.986508	NoPuro	2	0.9791	9	42.2444
23	9	41.3743	1.19481	0.987487	EMT-Puro	1	0.624173	9	42.2444
9	4	41.3842	0.852071	0.995318	NoPuro	3	0.926238	9	42.2444
9	10	41.5136	1.64384	0.997178	Puro	3	1.01046	9	42.2444
17	6	41.5558	0.891761	0.963105	NoPuro	1	1.05842	9	42.2444
13	6	41.5994	0.511811	0.988935	CHX-Puro	1	0.963247	9	42.2444
11	1	41.6194	0.675	0.982298	EMT-Puro	2	0.904594	9	42.2444
8	13	41.6279	0.682927	1.02971	EMT-Puro	3	0.97847	9	42.2444
9	5	41.7644	1.42857	1.00727	NoPuro	2	1.0291	9	42.2444
10	1.1	41.7916	1.33714	1.00401	EMT-Puro	4	1.02805	9	42.2444
10	1.2	41.7916	0.670213	1.00957	EMT-Puro	4	0.980178	9	42.2444
10	1.3	41.7916	0.785714	0.984367	EMT-Puro	4	0.973035	9	42.2444
9	5	41.795	0.564706	0.982291	NoPuro	3	0.922374	9	42.2444
17	7	41.8258	1.11628	0.983226	NoPuro	1	1.04471	9	42.2444
9	11	41.9181	0.827586	0.992142	Puro	3	0.993223	9	42.2444
13	7	41.9955	1.10976	0.983348	CHX-Puro	1	0.987217	9	42.2444
24	2	42.0461	0.741935	0.99562	EMT-Puro	1	0.632652	9	42.2444
11	2	42.0816	0.89011	0.969657	CHX-Puro	3	0.987183	9	42.2444
17	8.1	42.0959	1.16054	0.984715	NoPuro	1	1.00816	9	42.2444
17	8.2	42.0959	0.693642	0.991789	NoPuro	1	0.938123	9	42.2444
9	1	42.1145	0.947598	0.984318	EMT-Puro	3	0.966087	9	42.2444
9	6	42.2351	1.08475	0.995865	NoPuro	2	1.04663	9	42.2444
9	6	42.2444	1.06931	0.993079	NoPuro	3	0.951198	9	42.2444
24	3	42.3156	0.761229	0.993966	EMT-Puro	1	0.619165	9	42.2444
10	1	42.3455	1.16667	1.00333	Puro	3	0.978639	9	42.2444
17	9	42.3828	0.941915	0.992598	NoPuro	1	0.956525	9	42.2444
13	8	42.4011	1.3	1.00591	CHX-Puro	1	1.03099	9	42.2444
24	4	42.5919	1.20679	0.992254	EMT-Puro	1	0.739844	9	42.2444
10	3	42.5999	0.928571	0.964546	EMT-Puro	4	0.951606	9	42.2444
9	7	42.6758	0.571429	0.991511	NoPuro	2	1.01449	9	42.2444
18	1	42.6972	1.13684	0.983877	NoPuro	1	0.988926	9	42.2444
10	2	42.72	1.3125	1.00889	Puro	3	1.03846	9	42.2444
11	2.2	42.8678	0.869565	0.964457	EMT-Puro	2	0.919802	9	42.2444
11	2.1	42.8678	0.731707	0.987638	EMT-Puro	2	0.903587	9	42.2444
24	5	42.8843	0.756164	1.01412	EMT-Puro	1	0.744775	9	42.2444
8	1	42.8884	1.13636	0.983443	Puro	1	1.18065	9	42.2444
18	2	42.9864	0.727273	0.998934	NoPuro	1	0.959089	9	42.2444
24	6	43.1617	0.8	0.97289	EMT-Puro	1	0.782182	9	42.2444
11	3.1	43.2441	0.893855	0.99083	EMT-Puro	2	0.927119	9	42.2444
11	3.2	43.2441	0.672646	0.983653	EMT-Puro	2	0.87949	9	42.2444
9	7	43.2569	0.631148	0.993481	NoPuro	3	0.873136	9	42.2444
18	3.1	43.2671	1.53846	0.988275	NoPuro	1	1.02021	9	42.2444
18	3.2	43.2671	1.04803	0.98013	NoPuro	1	0.98005	9	42.2444
11	3	43.3076	0.830769	0.984912	CHX-Puro	3	0.959491	9	42.2444
24	7	43.4176	0.766667	0.961032	EMT-Puro	1	0.833643	9	42.2444
9	9	43.4878	1.13716	0.999324	NoPuro	2	1.01973	9	42.2444
18	4	43.5152	1.08632	0.986502	NoPuro	1	1.03411	9	42.2444
11	4	43.6331	0	0.983644	EMT-Puro	2	0.732217	9	42.2444
24	8	43.6848	1.6898	1.0469	EMT-Puro	1	0.905956	9	42.2444
11	4	43.6938	1.18125	0.999097	CHX-Puro	3	1.02137	9	42.2444
13	9	43.7184	1.01198	0.977162	CHX-Puro	1	1.04006	9	42.2444
18	5	43.7931	0.631579	1.00982	NoPuro	1	1.00809	9	42.2444
24	9	43.9713	1.49351	1.03966	EMT-Puro	1	0.97864	9	42.2444
11	5	44.036	0.957447	0.9701	EMT-Puro	2	0.772577	9	42.2444
8	2	44.06	1.29032	0.992568	Puro	1	1.19604	9	42.2444
9	2	44.0612	0.928571	0.997725	EMT-Puro	3	0.978175	9	42.2444
18	6	44.0822	1.12439	0.986376	NoPuro	1	1.0089	9	42.2444
5	4	44.0854	0.806723	0.997931	Puro	2	1.02124	9	42.2444
11	5	44.0946	1.19277	0.999273	CHX-Puro	3	0.988836	9	42.2444
14	1	44.1091	1.03704	0.99202	CHX-Puro	1	1.08035	9	42.2444
10	3	44.2433	1	0.974565	Puro	3	1.08265	9	42.2444
18	7	44.3505	1.89767	0.977007	NoPuro	1	1.08261	9	42.2444
9	8	44.467	0.615132	0.987546	NoPuro	3	0.851481	9	42.2444
8	3	44.4748	1.32075	1.00196	Puro	1	1.24425	9	42.2444
9	3	44.4759	1.02308	1.01047	EMT-Puro	3	1.012	9	42.2444
10	5	44.6057	0.822857	1.07403	EMT-Puro	4	0.900178	9	42.2444
5	5	44.6083	1.13793	0.959918	Puro	2	1.0471	9	42.2444
18	8.2	44.6237	0.971098	0.997626	NoPuro	1	1.11036	9	42.2444
18	8.1	44.6237	0.789168	0.984508	NoPuro	1	1.09508	9	42.2444
25	2	44.6533	1.23656	0.998124	EMT-Puro	1	1.06475	9	42.2444
10	4	44.6569	0.893023	0.96121	Puro	3	1.07195	9	42.2444
10	1	44.8217	0.888889	0.98428	NoPuro	2	0.994329	9	42.2444
8	4	44.8756	0.700637	0.992068	Puro	1	1.12563	9	42.2444
9	9	44.8801	1.31474	1.01141	NoPuro	3	0.856725	9	42.2444
9	4	44.8835	0.76087	0.999677	EMT-Puro	3	0.936205	9	42.2444
18	9	44.9124	1.01727	1.00006	NoPuro	1	1.08313	9	42.2444
25	3	44.9254	1.0331	0.98655	EMT-Puro	1	1.04857	9	42.2444
10	6	45.0043	0.96	1.00456	EMT-Puro	4	0.912178	9	42.2444
5	6	45.0491	0.869565	0.987552	Puro	2	1.03841	10	47.1024
10	5	45.1163	1	0.981721	Puro	3	1.06001	10	47.1024
25	4	45.2087	0.92284	0.995362	EMT-Puro	1	1.06666	10	47.1024
19	1	45.2246	1.13684	0.97792	NoPuro	1	1.12408	10	47.1024
10	2	45.2359	0.934132	1.00728	NoPuro	2	0.988989	10	47.1024
8	5	45.2901	0.810811	1.00513	Puro	1	1.11117	10	47.1024
11	6	45.291	1.30769	0.97667	CHX-Puro	3	1.00422	10	47.1024
9	5	45.2933	1.25472	1.00827	EMT-Puro	3	0.967862	10	47.1024
10	1	45.3081	0.90566	0.969859	NoPuro	3	0.864068	10	47.1024
5	7	45.4851	1.15789	0.994255	Puro	2	1.03841	10	47.1024
25	5	45.4967	1.00822	0.99323	EMT-Puro	1	1.09136	10	47.1024
19	2	45.4977	1.06952	0.997046	NoPuro	1	1.12623	10	47.1024
10	3	45.6201	0.619048	0.996401	NoPuro	2	0.962005	10	47.1024
11	7.1	45.6858	0.627907	0.974158	CHX-Puro	3	0.871586	10	47.1024
11	7.2	45.6858	0.48913	1.0165	CHX-Puro	3	0.955307	10	47.1024
10	2	45.6917	1.00559	0.992719	NoPuro	3	0.894507	10	47.1024
8	6	45.702	1.17647	0.991952	Puro	1	1.13873	10	47.1024
19	3.1	45.7662	0.512821	0.985876	NoPuro	1	1.02367	10	47.1024
19	3.2	45.7662	0.524017	0.984645	NoPuro	1	0.967438	10	47.1024
25	6	45.7667	0.966667	0.997074	EMT-Puro	1	1.06735	10	47.1024
11	7	45.7684	0	0.99825	EMT-Puro	2	0.681273	10	47.1024
10	8	45.7844	0.818182	0.995952	EMT-Puro	4	0.932632	10	47.1024
9	6	46.0032	1.08247	1.03253	EMT-Puro	3	0.95542	10	47.1024
25	7	46.0165	0.383333	0.971396	EMT-Puro	1	1.03007	10	47.1024
19	4	46.0274	0.858947	0.988243	NoPuro	1	0.990175	10	47.1024
10	9	46.1911	0.727941	0.977695	EMT-Puro	4	0.912779	10	47.1024
25	8	46.2891	0.844898	1.0191	EMT-Puro	1	1.03456	10	47.1024
19	5	46.3048	1.02632	1.00738	NoPuro	1	0.980367	10	47.1024
10	6	46.3064	0.987654	1.00864	Puro	3	1.09141	10	47.1024
5	8	46.3145	1.18033	0.993661	Puro	2	1.08759	10	47.1024
10	4	46.3587	0.802469	0.981754	NoPuro	2	0.956623	10	47.1024
11	8	46.3695	2.21538	0.996136	EMT-Puro	2	0.780084	10	47.1024
9	7	46.4166	1.14655	1.01642	EMT-Puro	3	0.98943	10	47.1024
19	6	46.5631	1.08562	0.977439	NoPuro	1	0.899162	10	47.1024
10	10	46.581	1.00346	1.00557	EMT-Puro	4	0.92662	10	47.1024
25	9	46.589	0.298701	1.0278	EMT-Puro	1	0.987762	10	47.1024
10	7	46.7216	1.17895	1.00758	Puro	3	1.08203	10	47.1024
10	5	46.7731	0.714286	1.00682	NoPuro	2	0.919719	10	47.1024
19	7	46.833	0.893023	0.993066	NoPuro	1	0.891354	10	47.1024
8	7.1	46.8363	0.788177	1.01924	Puro	1	1.07488	10	47.1024
8	7.2	46.8363	1.17647	0.987857	Puro	1	1.09951	10	47.1024
10	4	46.9315	0.994083	0.999692	NoPuro	3	0.895802	10	47.1024
10	11	46.9843	1.06061	1.00033	EMT-Puro	4	0.911469	10	47.1024
19	8.1	47.1024	0.974855	0.982551	NoPuro	1	0.909923	10	47.1024
19	8.2	47.1024	0.693642	0.999277	NoPuro	1	0.87756	10	47.1024
9	9	47.1961	1.19355	1.01101	EMT-Puro	3	1.00467	10	47.1024
10	6	47.2175	0.813559	0.987197	NoPuro	2	0.899429	10	47.1024
26	2	47.2502	1.73118	0.998685	EMT-Puro	1	0.9919	10	47.1024
10	5	47.3429	0.705882	0.984534	NoPuro	3	0.865832	10	47.1024
19	9	47.3905	0.866562	0.996509	NoPuro	1	0.850532	10	47.1024
11	1.3	47.4519	1.07143	0.994698	EMT-Puro	4	0.884897	10	47.1024
11	1.2	47.4519	1.24468	1.01045	EMT-Puro	4	0.942344	10	47.1024
11	1.1	47.4519	0.668571	0.987485	EMT-Puro	4	0.93063	10	47.1024
5	9	47.516	1.07692	0.985346	Puro	2	1.08759	10	47.1024
26	3	47.5442	1.0331	0.996802	EMT-Puro	1	0.945859	10	47.1024
10	7	47.6449	1.33333	0.999584	NoPuro	2	0.889905	10	47.1024
20	1	47.7116	1.13684	0.981822	NoPuro	1	0.857265	10	47.1024
26	4	47.8302	0.780864	1.00085	EMT-Puro	1	0.90029	10	47.1024
5	10	47.9372	0.979592	0.992503	Puro	2	1.09983	10	47.1024
20	2	47.9965	0.941176	0.989883	NoPuro	1	0.9001	10	47.1024
26	5	48.121	1.44932	1.0043	EMT-Puro	1	0.941912	10	47.1024
20	3.1	48.2687	0.717949	0.985683	NoPuro	1	0.919493	10	47.1024
20	3.2	48.2687	0.733624	0.984402	NoPuro	1	0.906961	10	47.1024
11	3	48.272	1.07143	1.00066	EMT-Puro	4	0.944916	10	47.1024
8	8	48.311	1.15789	0.986036	Puro	1	1.09263	10	47.1024
26	6	48.3994	1.1	0.993261	EMT-Puro	1	0.959628	10	47.1024
10	6	48.4375	1.30693	0.99727	NoPuro	3	0.911318	10	47.1024
10	9	48.4425	0.957606	1.0072	NoPuro	2	0.877191	10	47.1024
20	4	48.5114	0.808421	0.989018	NoPuro	1	0.885172	10	47.1024
26	7	48.6429	0.766667	0.961373	EMT-Puro	1	0.935472	10	47.1024
20	5	48.7842	1.10526	0.99844	NoPuro	1	0.887136	10	47.1024
10	7	48.8574	1.2623	1.01069	NoPuro	3	0.981077	10	47.1024
26	8	48.9086	1.6898	1.03706	EMT-Puro	1	1.00779	10	47.1024
14	4	48.9236	1.07784	1.01158	CHX-Puro	1	1.02563	10	47.1024
20	6	49.0449	1.04685	1.04278	NoPuro	1	0.902518	10	47.1024
5	11	49.1146	1.35849	0.984249	Puro	2	1.12247	10	47.1024
26	9	49.1962	1.49351	1.02245	EMT-Puro	1	1.1188	10	47.1024
10	8	49.2641	0.796053	0.988032	NoPuro	3	0.953751	10	47.1024
20	7	49.3122	1.11628	0.961829	NoPuro	1	0.916661	10	47.1024
11	1	49.3483	1.16667	0.9876	NoPuro	2	0.936715	10	47.1024
20	8.2	49.5881	0.693642	1.00628	NoPuro	1	0.916661	10	47.1024
20	8.1	49.5881	1.16054	0.993577	NoPuro	1	0.946059	10	47.1024
8	3	49.6117	0.980892	0.987267	CHX-Puro	2	0.978848	10	47.1024
10	9	49.6766	0.920319	1.01417	NoPuro	3	0.982668	10	47.1024
14	6	49.7434	0.92126	1.00396	CHX-Puro	1	1.00878	10	47.1024
11	2	49.7538	1.32335	1.00662	NoPuro	2	0.955334	10	47.1024
27	2	49.8686	1.48387	1.00371	EMT-Puro	1	1.1827	10	47.1024
20	9	49.8741	0.904239	0.996156	NoPuro	1	0.922798	10	47.1024
8	4	50.0557	0.803279	1.00865	CHX-Puro	2	0.982673	11	52.2999
11	1	50.1227	0.301887	0.955066	NoPuro	3	0.951344	11	52.2999
10	8	50.1395	0.787879	0.991199	Puro	3	1.07981	11	52.2999
27	3	50.1402	0.978723	0.987673	EMT-Puro	1	1.2507	11	52.2999
11	3	50.1406	1.2381	0.998297	NoPuro	2	0.990255	11	52.2999
14	7	50.1452	1.26829	1.01984	CHX-Puro	1	1.00227	11	52.2999
21	1	50.1847	0.757895	0.97983	NoPuro	1	0.90447	11	52.2999
27	4	50.4252	0.780864	1.00115	EMT-Puro	1	1.15567	11	52.2999
8	5	50.4501	0.951456	0.989715	CHX-Puro	2	0.962284	11	52.2999
21	2	50.4599	1.06952	0.984233	NoPuro	1	0.939627	11	52.2999
11	2	50.5032	1.00559	1.00062	NoPuro	3	0.920428	11	52.2999
10	9	50.5215	0.607595	1.00311	Puro	3	0.976185	11	52.2999
14	8	50.5389	0.325	1.0019	CHX-Puro	1	0.93534	11	52.2999
9	1	50.5403	0.984848	0.998394	Puro	1	1.05428	11	52.2999
11	4	50.5532	0.641975	0.987866	NoPuro	2	0.961039	11	52.2999
27	5	50.707	0.945205	1.00168	EMT-Puro	1	1.14688	11	52.2999
21	3.1	50.7273	1.53846	0.995701	NoPuro	1	1.02011	11	52.2999
21	3.2	50.7273	1.67686	0.987437	NoPuro	1	1.10695	11	52.2999
6	1	50.7282	0.764706	0.992607	Puro	2	1.06365	11	52.2999
8	6	50.8904	1.17727	1.00527	CHX-Puro	2	0.968648	11	52.2999
14	9	50.9545	1.08982	1.01822	CHX-Puro	1	0.96528	11	52.2999
9	2	50.9646	1.35484	1.00016	Puro	1	1.07612	11	52.2999
21	4	50.9792	1.03579	0.987478	NoPuro	1	1.10001	11	52.2999
27	6	50.9819	1.01667	0.999929	EMT-Puro	1	1.17046	11	52.2999
11	5	50.9854	0.928571	1.00026	NoPuro	2	0.991992	11	52.2999
6	2	51.1326	0.608696	1.01196	Puro	2	0.994085	11	52.2999
27	7	51.2304	1.34167	0.962692	EMT-Puro	1	1.1597	11	52.2999
21	5	51.2562	1.26316	1.01043	NoPuro	1	1.12164	11	52.2999
11	4	51.3212	0.923077	0.99829	NoPuro	3	0.92217	11	52.2999
15	1	51.3404	1.18519	1.03326	CHX-Puro	1	1.03262	11	52.2999
9	3	51.3708	1.32075	1.00189	Puro	1	1.07917	11	52.2999
27	8	51.5041	1.78367	1.04135	EMT-Puro	1	1.22806	11	52.2999
21	6	51.5256	1.27948	0.980619	NoPuro	1	1.13796	11	52.2999
15	2	51.7368	1.0565	1.02424	CHX-Puro	1	1.02729	11	52.2999
11	5	51.7374	0.847059	0.980311	NoPuro	3	0.906317	11	52.2999
9	4	51.7724	1.21019	0.99716	Puro	1	1.06811	11	52.2999
27	9	51.7912	0.597403	1.02972	EMT-Puro	1	1.21114	11	52.2999
21	7	51.7951	1.33953	0.985188	NoPuro	1	1.20255	11	52.2999
11	6	51.8042	1.15254	0.990656	NoPuro	2	1.027	11	52.2999
21	8.2	52.0705	0.971098	1.00486	NoPuro	1	1.2278	11	52.2999
21	8.1	52.0705	1.34623	0.988243	NoPuro	1	1.22112	11	52.2999
11	6	52.1815	0.831683	0.998517	NoPuro	3	0.890077	11	52.2999
9	5	52.1855	1.17117	1.01073	Puro	1	1.11516	11	52.2999
11	7	52.2397	0.666667	0.988645	NoPuro	2	1.02224	11	52.2999
21	9	52.3602	1.01727	0.996324	NoPuro	1	1.25374	11	52.2999
28	2	52.4624	0.741935	1.00856	EMT-Puro	1	1.11635	11	52.2999
15	4	52.5202	1.00599	1.00273	CHX-Puro	1	0.99789	11	52.2999
9	6	52.597	0.588235	1.00055	Puro	1	1.09291	11	52.2999
11	7	52.6101	0.540984	1.01369	NoPuro	3	0.873587	11	52.2999
22	1	52.6746	1.38947	0.97386	NoPuro	1	1.28574	11	52.2999
28	3	52.7366	1.30496	1.00496	EMT-Puro	1	1.0975	11	52.2999
22	2	52.952	1.19786	0.990386	NoPuro	1	1.25168	11	52.2999
11	8	53.014	0.976974	0.994254	NoPuro	3	0.840592	11	52.2999
28	4	53.0232	1.27778	0.998866	EMT-Puro	1	1.07689	11	52.2999
9	7.1	53.043	1.08374	0.981585	Puro	1	1.02481	11	52.2999
9	7.2	53.043	0.588235	0.998926	Puro	1	1.03408	11	52.2999
11	9	53.0438	0.86783	1.00429	NoPuro	2	1.02766	11	52.2999
22	3.1	53.2141	0.923077	0.982802	NoPuro	1	1.16704	11	52.2999
22	3.2	53.2141	0.943231	0.983475	NoPuro	1	1.17831	11	52.2999
28	5	53.3126	0.756164	1.00563	EMT-Puro	1	1.05463	11	52.2999
15	6	53.3302	0.92126	1.00376	CHX-Puro	1	0.988818	11	52.2999
9	8	53.4481	0.947368	0.983271	Puro	1	1.04073	11	52.2999
22	4	53.4573	1.11158	0.986098	NoPuro	1	1.15188	11	52.2999
12	1	53.5198	0.666667	0.988101	NoPuro	2	0.960997	11	52.2999
28	6	53.5816	0.933333	1.00228	EMT-Puro	1	1.06988	11	52.2999
15	7	53.7332	0.47561	0.996539	CHX-Puro	1	0.932676	11	52.2999
22	5	53.7374	1.18421	0.99484	NoPuro	1	1.14236	11	52.2999
28	7	53.8361	1.53333	0.980633	EMT-Puro	1	1.12869	11	52.2999
12	2	53.9253	0.856287	0.99929	NoPuro	2	0.950866	11	52.2999
22	6	54.0171	1.35703	0.998346	NoPuro	1	1.14411	11	52.2999
28	8	54.1081	1.40816	1.02668	EMT-Puro	1	1.16784	11	52.2999
15	8	54.1255	0	1.00149	CHX-Puro	1	0.824891	11	52.2999
11	8	54.1641	0.993103	0.978142	CHX-Puro	3	0.86538	11	52.2999
22	7	54.2806	0.781395	0.971532	NoPuro	1	1.08762	11	52.2999
11	9	54.2812	1.05179	0.938183	NoPuro	3	0.819541	11	52.2999
12	3	54.3113	1.70238	0.998296	NoPuro	2	1.00444	11	52.2999
10	1	54.3299	0.681818	0.989736	Puro	1	0.993121	11	52.2999
28	9	54.3866	0.896104	1.03044	EMT-Puro	1	1.12329	11	52.2999
15	9	54.5289	1.4012	1.00718	CHX-Puro	1	0.872885	11	52.2999
22	8.1	54.5548	0.742747	0.989115	NoPuro	1	1.06479	11	52.2999
22	8.2	54.5548	0.693642	1.00551	NoPuro	1	1.03242	11	52.2999
6	4	54.6535	0.907563	0.979603	Puro	2	1.00417	11	52.2999
12	4	54.7193	0.962963	0.987125	NoPuro	2	0.968398	11	52.2999
10	2	54.7567	0.83871	0.993742	Puro	1	0.978507	11	52.2999
22	9	54.8412	0.678179	0.989765	NoPuro	1	0.961295	11	52.2999
11	9.1	54.849	1.09091	1.01223	EMT-Puro	2	0.899673	11	52.2999
11	9.2	54.849	1.56522	1.00449	EMT-Puro	2	0.858082	11	52.2999
16	1	54.912	1.33333	1.01397	CHX-Puro	1	0.879389	11	52.2999
29	2	55.0573	0.494624	1.00712	EMT-Puro	1	0.99438	12	57.7309
6	5	55.0628	0.982759	0.969252	Puro	2	0.988652	12	57.7309
12	5	55.1521	0.75	0.993272	NoPuro	2	0.919588	12	57.7309
23	1	55.1598	0.884211	0.97236	NoPuro	1	0.92993	12	57.7309
10	3	55.1718	0.943396	0.998274	Puro	1	0.937362	12	57.7309
16	2	55.3015	1.0565	1.00573	CHX-Puro	1	0.952539	12	57.7309
29	3	55.3325	0.815603	0.992205	EMT-Puro	1	1.0162	12	57.7309
23	2	55.4383	1.02674	0.991045	NoPuro	1	0.93828	12	57.7309
12	1	55.473	0.981132	1.00637	NoPuro	3	0.838049	12	57.7309
6	6	55.5137	0.869565	0.995219	Puro	2	0.988652	12	57.7309
10	4	55.5794	1.01911	0.99706	Puro	1	0.907198	12	57.7309
12	6	55.5997	1.42373	0.986008	NoPuro	2	0.997764	12	57.7309
29	4	55.6211	0.993827	1.01442	EMT-Puro	1	1.04139	12	57.7309
23	3.1	55.7019	1.12821	0.986384	NoPuro	1	0.900037	12	57.7309
23	3.2	55.7019	0.524017	0.983667	NoPuro	1	0.898375	12	57.7309
11	5	55.7286	0.925714	0.986585	EMT-Puro	4	0.955201	12	57.7309
12	2	55.861	1.2067	0.994939	NoPuro	3	0.866688	12	57.7309
29	5	55.9021	1.13425	1.00024	EMT-Puro	1	1.02432	12	57.7309
6	7	55.9486	0.947368	0.988966	Puro	2	0.967599	12	57.7309
23	4	55.9503	1.01053	0.987052	NoPuro	1	0.882669	12	57.7309
10	5	55.9923	0.900901	1.00654	Puro	1	0.876269	12	57.7309
12	7	56.0416	1.14286	0.99261	NoPuro	2	1.01919	12	57.7309
9	11	56.0555	0.986301	1.00014	EMT-Puro	3	1.00066	12	57.7309
16	4	56.1052	0.646707	0.997786	CHX-Puro	1	0.908227	12	57.7309
11	6	56.1246	1.2	1.01048	EMT-Puro	4	0.979201	12	57.7309
29	6	56.171	1.11667	0.998113	EMT-Puro	1	1.00821	12	57.7309
23	5	56.2481	0.631579	0.976262	NoPuro	1	0.810124	12	57.7309
6	8	56.3894	0.786885	0.992854	Puro	2	0.928255	12	57.7309
10	6	56.4034	0.392157	1.0002	Puro	1	0.798367	12	57.7309
29	7	56.4249	0.958333	0.976176	EMT-Puro	1	1.02842	12	57.7309
23	6	56.5186	0.930533	1.00542	NoPuro	1	0.825038	12	57.7309
29	8	56.7093	0.844898	0.985696	EMT-Puro	1	1.01958	12	57.7309
23	7	56.7799	0.781395	0.972786	NoPuro	1	0.828903	12	57.7309
6	9	56.7837	1.07692	1.00012	Puro	2	0.928255	12	57.7309
8	7	56.79	1.41667	1.004	CHX-Puro	2	1.01031	12	57.7309
12	9	56.8505	1.04738	1.00154	NoPuro	2	1.00868	12	57.7309
11	8	56.894	0.409091	1.00274	EMT-Puro	4	0.938292	12	57.7309
16	6	56.9283	1.02362	1.00074	CHX-Puro	1	0.892071	12	57.7309
29	9	56.9936	0.896104	1.01969	EMT-Puro	1	0.955857	12	57.7309
23	8.2	57.0702	1.66474	1.01769	NoPuro	1	0.926012	12	57.7309
23	8.1	57.0702	1.0677	0.990731	NoPuro	1	0.964964	12	57.7309
8	8	57.1795	0.960784	1.0133	CHX-Puro	2	1.0309	12	57.7309
6	10	57.1999	0.979592	0.997588	Puro	2	0.928255	12	57.7309
13	1	57.3178	0.777778	0.979295	NoPuro	2	1.01979	12	57.7309
16	7	57.3205	1.42683	0.98965	CHX-Puro	1	0.929104	12	57.7309
23	9	57.3567	1.1303	0.99338	NoPuro	1	0.989573	12	57.7309
10	7.1	57.5434	0.689655	0.995436	Puro	1	0.808509	12	57.7309
10	7.2	57.5434	0.882353	1.00317	Puro	1	0.837921	12	57.7309
8	9	57.569	1.25	1.01497	CHX-Puro	2	1.07257	12	57.7309
30	2	57.6707	1.48387	1.00351	EMT-Puro	1	0.963428	12	57.7309
24	1	57.6829	0.884211	0.962867	NoPuro	1	0.97532	12	57.7309
16	8	57.7192	1.3	0.9985	CHX-Puro	1	0.958506	12	57.7309
13	2	57.7309	0.856287	1.00108	NoPuro	2	1.01863	12	57.7309
11	10	57.8356	1.02685	1.02443	EMT-Puro	2	0.915401	12	57.7309
11	9	57.8398	0.970588	0.984731	CHX-Puro	3	0.909497	12	57.7309
30	3	57.9481	1.41371	0.994281	EMT-Puro	1	1.01519	12	57.7309
10	8	57.9602	0.526316	0.988816	Puro	1	0.782178	12	57.7309
24	2	57.9696	1.3262	0.993815	NoPuro	1	1.05554	12	57.7309
12	4	58.124	1.27811	0.977959	NoPuro	3	0.96431	12	57.7309
11	10	58.2209	0.699029	1.23184	CHX-Puro	3	0.918235	12	57.7309
24	3.1	58.2368	0.923077	0.988583	NoPuro	1	1.03503	12	57.7309
24	3.2	58.2368	0.838428	0.985006	NoPuro	1	1.01782	12	57.7309
30	4	58.2419	1.27778	1.00586	EMT-Puro	1	1.0935	12	57.7309
6	11	58.3822	1.24528	0.992139	Puro	2	0.916934	12	57.7309
24	4	58.4818	1.06105	0.980251	NoPuro	1	1.06076	12	57.7309
30	5	58.5279	0.693151	1.01728	EMT-Puro	1	1.08126	12	57.7309
12	5	58.5297	0.705882	0.978753	NoPuro	3	0.934339	12	57.7309
13	3	58.6446	1.39286	0.995461	NoPuro	2	1.09125	12	57.7309
12	1	58.7392	1.125	0.98956	EMT-Puro	2	0.95473	12	57.7309
11	9	58.7467	0.827206	1.00359	EMT-Puro	4	0.948219	12	57.7309
24	5	58.7629	0.947368	0.995548	NoPuro	1	1.06245	12	57.7309
30	6	58.7989	1.11667	1.01229	EMT-Puro	1	1.09354	12	57.7309
10	10	58.9691	1.42466	0.986777	Puro	3	1.03589	12	57.7309
24	6	59.0467	0.659128	0.986767	NoPuro	1	1.05022	12	57.7309
30	7	59.0554	0.766667	0.979997	EMT-Puro	1	1.05678	12	57.7309
9	12	59.1169	0.90566	1.02537	EMT-Puro	3	1.02294	12	57.7309
8	10	59.127	1.63014	0.990353	CHX-Puro	2	1.10134	12	57.7309
11	10	59.1351	0.83045	1.01687	EMT-Puro	4	0.930918	12	57.7309
12	2.1	59.1367	0.853659	0.99519	EMT-Puro	2	0.950711	12	57.7309
12	2.2	59.1367	0.790514	1.00941	EMT-Puro	2	0.962498	12	57.7309
24	7	59.3156	1.11628	0.96139	NoPuro	1	0.995374	12	57.7309
13	4	59.3177	0.427984	0.982753	NoPuro	2	1.04842	12	57.7309
30	8	59.3216	1.50204	1.02674	EMT-Puro	1	1.09532	12	57.7309
9	13	59.5059	1.46341	1.01334	EMT-Puro	3	1.07452	12	57.7309
12	3.1	59.5183	0.726257	1.00698	EMT-Puro	2	1.03512	12	57.7309
12	3.2	59.5183	1.30045	0.996347	EMT-Puro	2	1.06942	12	57.7309
11	11	59.5273	0.909091	1.00257	EMT-Puro	4	0.915766	12	57.7309
8	11	59.5352	1.00513	1.0017	CHX-Puro	2	1.09416	12	57.7309
10	11	59.5801	0.91954	0.999473	Puro	3	1.01118	12	57.7309
24	8.1	59.592	1.0677	0.996474	NoPuro	1	0.995374	12	57.7309
24	8.2	59.592	0.693642	1.01462	NoPuro	1	0.951709	12	57.7309
30	9	59.617	1.79221	1.02418	EMT-Puro	1	1.17871	12	57.7309
16	9	59.6248	0.778443	0.977654	CHX-Puro	1	0.944224	12	57.7309
13	5	59.7372	0.892857	0.998802	NoPuro	2	0.967469	12	57.7309
24	9	59.878	0.866562	0.995923	NoPuro	1	0.949944	12	57.7309
12	6	59.951	0.831683	0.982822	NoPuro	3	0.9252	12	57.7309
12	1.1	60	1.02857	1.03533	EMT-Puro	4	0.887012	12	57.7309
12	1.3	60	1	1.05343	EMT-Puro	4	0.908623	12	57.7309
9	1	60	0.510638	0.995553	CHX-Puro	2	1.06863	12	57.7309
7	1	60	1	1.01483	Puro	2	0.940463	12	57.7309
11	1	60	0.666667	1.03383	Puro	3	0.946596	12	57.7309
12	1.2	60	1.14894	1.04161	EMT-Puro	4	0.935049	12	57.7309
10	1	60	0.871179	1.02343	EMT-Puro	3	1.06878	12	57.7309
11	1	60.0039	1.36364	1.00232	Puro	1	0.823805	12	57.7309
17	1	60.0042	0.888889	0.997708	CHX-Puro	1	0.985552	12	57.7309
13	6	60.1877	1.15254	0.998707	NoPuro	2	0.986427	13	62.4142
25	1	60.195	1.26316	0.974699	NoPuro	1	0.943639	13	62.4142
31	2	60.2982	1.48387	0.992623	EMT-Puro	1	1.24261	13	62.4142
12	7	60.3679	0.991803	1.02169	NoPuro	3	0.939674	13	62.4142
11	2	60.3725	1.45833	1.01987	Puro	3	0.99243	13	62.4142
10	2	60.3873	1.14286	1.02836	EMT-Puro	3	1.08076	13	62.4142
12	2	60.3975	1.18681	0.980065	CHX-Puro	3	0.947905	13	62.4142
17	2	60.3975	1.18079	1.00228	CHX-Puro	1	1.10363	13	62.4142
7	2	60.3997	0.956522	0.991656	Puro	2	0.975246	13	62.4142
11	2	60.4307	0.967742	0.994666	Puro	1	0.852397	13	62.4142
25	2	60.4708	1.19786	0.977437	NoPuro	1	0.971118	13	62.4142
31	3	60.5763	1.25059	0.986692	EMT-Puro	1	1.27806	13	62.4142
13	7	60.6086	0.857143	0.99557	NoPuro	2	0.997142	13	62.4142
25	3.2	60.7349	0.733624	0.982543	NoPuro	1	0.960637	13	62.4142
25	3.1	60.7349	1.12821	0.99263	NoPuro	1	0.967353	13	62.4142
11	3	60.7689	1.14286	1.00171	Puro	3	1.01741	13	62.4142
12	8	60.7751	0.940789	0.98782	NoPuro	3	0.950585	13	62.4142
10	3	60.7993	1.13077	1.00367	EMT-Puro	3	1.11775	13	62.4142
12	3	60.8106	1.52308	1.01208	CHX-Puro	3	1.01714	13	62.4142
9	3	60.8452	1.11465	1.01136	CHX-Puro	2	1.082	13	62.4142
11	3	60.8476	1.13208	1.00162	Puro	1	0.881734	13	62.4142
31	4	60.8739	1.34877	1.00255	EMT-Puro	1	1.26454	13	62.4142
25	4	60.9858	1.08632	0.990427	NoPuro	1	0.981247	13	62.4142
31	5	61.1539	1.07123	1.00044	EMT-Puro	1	1.2303	13	62.4142
17	4	61.1804	1.1497	1.00736	CHX-Puro	1	1.07848	13	62.4142
11	4	61.1857	1.07907	0.969366	Puro	3	1.02532	13	62.4142
12	4	61.1941	1.06875	1.02609	CHX-Puro	3	1.00589	13	62.4142
10	4	61.2045	0.98913	1.01343	EMT-Puro	3	1.09119	13	62.4142
11	4	61.2431	1.21019	0.994568	Puro	1	0.908413	13	62.4142
12	4	61.2439	0.878049	0.988692	EMT-Puro	2	1.15723	13	62.4142
25	5	61.2611	1.02632	0.997272	NoPuro	1	1.01797	13	62.4142
9	4	61.2784	1.07104	1.01436	CHX-Puro	2	1.10878	13	62.4142
13	9	61.4146	1.13716	0.991579	NoPuro	2	0.968484	13	62.4142
31	6	61.4388	0.916667	0.989757	EMT-Puro	1	1.19419	13	62.4142
25	6	61.5251	1.12439	0.940188	NoPuro	1	1.01878	13	62.4142
12	5	61.5959	1.84337	1.01946	CHX-Puro	3	1.07095	13	62.4142
10	5	61.6099	0.858491	1.01305	EMT-Puro	3	1.06879	13	62.4142
11	5	61.6452	1.27778	0.996708	Puro	3	1.05433	13	62.4142
12	5	61.6504	0.765957	1.00496	EMT-Puro	2	1.01229	13	62.4142
9	5	61.6721	1.29126	0.998863	CHX-Puro	2	1.14276	13	62.4142
31	7	61.6832	1.15	0.993688	EMT-Puro	1	1.23987	13	62.4142
25	7	61.7966	1.00465	0.988402	NoPuro	1	1.01247	13	62.4142
31	8	61.9542	1.03265	0.975052	EMT-Puro	1	1.23147	13	62.4142
17	6	61.9942	1.22835	0.993996	CHX-Puro	1	1.06798	13	62.4142
10	6	62.0065	1.08247	1.02804	EMT-Puro	3	1.06238	13	62.4142
12	6	62.0202	0.769231	1.01081	CHX-Puro	3	1.0171	13	62.4142
25	8.2	62.0714	1.38728	1.0169	NoPuro	1	1.14373	13	62.4142
25	8.1	62.0714	1.48549	0.982162	NoPuro	1	1.09166	13	62.4142
11	6	62.1453	1.02058	1.03522	Puro	3	1.0385	13	62.4142
31	9	62.2386	2.09091	1.01359	EMT-Puro	1	1.36389	13	62.4142
11	5	62.3044	0.900901	0.998212	Puro	1	0.896593	13	62.4142
12	3	62.3064	1.14286	0.973815	EMT-Puro	4	0.942192	13	62.4142
14	1	62.3197	0.722222	0.991056	NoPuro	2	0.926421	13	62.4142
25	9	62.3569	1.01727	0.994048	NoPuro	1	1.11914	13	62.4142
17	7	62.395	1.10976	0.978898	CHX-Puro	1	1.07331	13	62.4142
10	7	62.4142	1.14655	0.987584	EMT-Puro	3	1.05768	13	62.4142
12	9	62.4843	0.74502	0.940832	NoPuro	3	0.970989	13	62.4142
11	7	62.5417	0.673684	0.997512	Puro	3	1.02708	13	62.4142
26	1	62.6744	1.26316	0.968728	NoPuro	1	1.12567	13	62.4142
11	6	62.7173	1.17647	1.00066	Puro	1	0.92415	13	62.4142
14	2	62.7226	0.856287	0.997559	NoPuro	2	0.907312	13	62.4142
12	7	62.7418	0.981818	1.00417	EMT-Puro	2	0.953946	13	62.4142
17	8	62.799	1.625	1.00856	CHX-Puro	1	1.17114	13	62.4142
13	1	62.9201	0.679245	0.947045	NoPuro	3	0.941216	13	62.4142
32	2	62.9291	1.23656	0.984887	EMT-Puro	1	1.33735	13	62.4142
26	2	62.9711	1.06952	0.966497	NoPuro	1	1.15926	13	62.4142
12	5	63.084	0.925714	1.00554	EMT-Puro	4	0.942192	13	62.4142
14	3	63.1077	0.77381	0.993867	NoPuro	2	0.906915	13	62.4142
12	8	63.1243	0.692308	1.02322	EMT-Puro	2	0.914086	13	62.4142
17	9	63.203	0.700599	0.987833	CHX-Puro	1	1.13884	13	62.4142
32	3	63.2065	1.19622	0.991505	EMT-Puro	1	1.27775	13	62.4142
26	3.1	63.2394	1.23077	0.995225	NoPuro	1	1.16952	13	62.4142
26	3.2	63.2394	0.838428	0.981375	NoPuro	1	1.14473	13	62.4142
13	2	63.3042	1.47486	1.00393	NoPuro	3	0.983523	13	62.4142
12	6	63.4891	0.96	1.01408	EMT-Puro	4	0.918192	13	62.4142
26	4	63.4902	1.06105	0.993883	NoPuro	1	1.1482	13	62.4142
32	4	63.4946	1.27778	0.974451	EMT-Puro	1	1.25714	13	62.4142
10	9	63.5772	0.870968	1.0155	EMT-Puro	3	1.04615	13	62.4142
18	1	63.5963	1.33333	0.991185	CHX-Puro	1	1.12949	13	62.4142
12	9.2	63.7102	1.43478	1.00204	EMT-Puro	2	0.954879	13	62.4142
12	9.1	63.7102	0.681818	1.01126	EMT-Puro	2	0.910561	13	62.4142
26	5	63.7656	1.18421	0.980687	NoPuro	1	1.15418	13	62.4142
32	5	63.7901	0.819178	1.00443	EMT-Puro	1	1.214	13	62.4142
14	4	63.8389	1.06996	0.98257	NoPuro	2	0.928282	13	62.4142
18	2	63.9735	0.99435	1.00704	CHX-Puro	1	1.09892	13	62.4142
26	6	64.0499	0.775444	0.962374	NoPuro	1	1.13126	13	62.4142
32	6	64.0637	0.866667	0.981356	EMT-Puro	1	1.16579	13	62.4142
13	4	64.1216	0.852071	0.99305	NoPuro	3	0.970617	13	62.4142
12	10	64.1323	0.785235	1.01848	EMT-Puro	2	0.903719	13	62.4142
12	7.2	64.1419	1.27174	1.00318	CHX-Puro	3	1.09536	13	62.4142
12	7.1	64.1419	1.67442	0.976142	CHX-Puro	3	1.20001	13	62.4142
14	5	64.2604	0.964286	0.992995	NoPuro	2	0.885425	13	62.4142
26	7	64.3188	1.11628	0.972182	NoPuro	1	1.09434	13	62.4142
32	7	64.3202	1.53333	1.01099	EMT-Puro	1	1.212	13	62.4142
12	8	64.3632	1.43182	1.02387	EMT-Puro	4	1.02046	13	62.4142
10	11	64.3797	1.15068	0.995903	EMT-Puro	3	1.07065	13	62.4142
12	8	64.5219	1.17931	0.998515	CHX-Puro	3	1.21863	13	62.4142
13	5	64.5362	0.847059	0.977442	NoPuro	3	0.934652	13	62.4142
32	8	64.5853	0.563265	0.958492	EMT-Puro	1	1.17666	13	62.4142
26	8.2	64.6	1.10983	1.01353	NoPuro	1	1.0666	13	62.4142
26	8.1	64.6	1.25338	0.982652	NoPuro	1	1.09021	13	62.4142
13	1	64.6168	0.75	0.996445	EMT-Puro	2	0.899667	13	62.4142
18	4	64.7679	1.29341	0.994398	CHX-Puro	1	1.15042	13	62.4142
12	9	64.7713	0.794118	1.03031	EMT-Puro	4	1.01716	13	62.4142
10	12	64.7794	0.845283	1.04096	EMT-Puro	3	1.00884	13	62.4142
14	6	64.809	1.01695	0.997793	NoPuro	2	0.944321	13	62.4142
32	9	64.8933	2.68831	1.00629	EMT-Puro	1	1.33049	13	62.4142
26	9	64.8939	1.01727	0.993855	NoPuro	1	1.06562	13	62.4142
12	9	64.9211	1.14706	1.00252	CHX-Puro	3	1.23628	13	62.4142
13	2.2	65.0111	0.988142	1.00782	EMT-Puro	2	0.881177	13	62.4142
13	2.1	65.0111	0.853659	1.00693	EMT-Puro	2	0.912407	13	62.4142
12	10	65.1573	0.83045	1.01697	EMT-Puro	4	1.01716	14	67.5805
10	13	65.1615	1.02439	1.16835	EMT-Puro	3	1.02416	14	67.5805
27	1	65.2087	1.51579	0.96479	NoPuro	1	1.11025	14	67.5805
14	7	65.2435	1.14286	0.9887	NoPuro	2	0.969321	14	67.5805
12	10	65.2973	1.13592	0.987674	CHX-Puro	3	1.27997	14	67.5805
13	6	65.4601	0.950495	0.987865	NoPuro	3	0.901891	14	67.5805
27	2	65.483	1.02674	0.977648	NoPuro	1	1.08984	14	67.5805
33	2	65.5555	1.48387	0.999535	EMT-Puro	1	1.37561	14	67.5805
11	1	65.6495	0.871179	1.04539	EMT-Puro	3	0.996992	14	67.5805
9	6	65.6705	1.11364	1.00759	CHX-Puro	2	1.13639	14	67.5805
27	3.2	65.7481	0.943231	0.980868	NoPuro	1	1.09678	14	67.5805
27	3.1	65.7481	1.02564	0.985637	NoPuro	1	1.10856	14	67.5805
33	3	65.8363	1.41371	0.973395	EMT-Puro	1	1.30789	14	67.5805
13	3.2	65.8624	1.07623	0.980708	EMT-Puro	2	0.908198	14	67.5805
13	3.1	65.8624	0.837989	1.00384	EMT-Puro	2	0.877171	14	67.5805
13	7	65.8854	1.2623	1.02434	NoPuro	3	0.957532	14	67.5805
11	8	65.9762	0.727273	0.993413	Puro	3	1.03904	14	67.5805
27	4	66.001	1.08632	0.983027	NoPuro	1	1.08699	14	67.5805
9	7	66.0393	0.583333	1.0168	CHX-Puro	2	1.05306	14	67.5805
11	2	66.0406	1.21429	1.02461	EMT-Puro	3	1.00534	14	67.5805
14	9	66.0695	1.01746	0.997621	NoPuro	2	0.955813	14	67.5805
33	4	66.1185	1.1358	0.979503	EMT-Puro	1	1.29781	14	67.5805
13	2	66.1215	1.28571	0.98744	CHX-Puro	3	1.28986	14	67.5805
13	4	66.2515	0.219512	0.999714	EMT-Puro	2	0.831968	14	67.5805
27	5	66.2801	1.26316	0.979349	NoPuro	1	1.13576	14	67.5805
13	8	66.3011	0.868421	0.9847	NoPuro	3	0.961206	14	67.5805
11	9	66.3545	1.41772	1.09745	Puro	3	1.03835	14	67.5805
33	5	66.3997	1.07123	0.959658	EMT-Puro	1	1.28532	14	67.5805
9	8	66.4139	0.663399	1.00729	CHX-Puro	2	1.02332	14	67.5805
11	3	66.4649	1.18462	1.00349	EMT-Puro	3	1.02489	14	67.5805
13	3	66.5446	1.24615	0.995313	CHX-Puro	3	1.26217	14	67.5805
27	6	66.5575	0.969305	0.978399	NoPuro	1	1.12107	14	67.5805
13	5	66.6421	1.43617	0.985426	EMT-Puro	2	0.906354	14	67.5805
33	6	66.6745	0.7	0.976386	EMT-Puro	1	1.22754	14	67.5805
11	10	66.7376	0.986301	0.979562	Puro	3	1.04503	14	67.5805
9	9	66.8109	1.25	0.986681	CHX-Puro	2	1.02332	14	67.5805
27	7	66.8311	1.00465	0.981906	NoPuro	1	1.11055	14	67.5805
11	4	66.8618	1.21739	1.00979	EMT-Puro	3	1.06078	14	67.5805
15	1	66.9203	1.05556	0.981944	NoPuro	2	0.975654	14	67.5805
33	7	66.9241	0.191667	0.988244	EMT-Puro	1	1.16479	14	67.5805
13	4	66.9319	1.0125	1.03378	CHX-Puro	3	1.25654	14	67.5805
18	6	67.0828	0.409449	0.982153	CHX-Puro	1	1.10247	14	67.5805
27	8.2	67.1144	0.971098	1.01018	NoPuro	1	1.07344	14	67.5805
27	8.1	67.1144	0.928433	0.980468	NoPuro	1	1.07805	14	67.5805
11	11	67.1368	1.10345	1.01753	Puro	3	1.0887	14	67.5805
33	8	67.2003	0.938776	0.973747	EMT-Puro	1	1.172	14	67.5805
11	5	67.2726	0.990566	1.01293	EMT-Puro	3	1.05159	14	67.5805
15	2	67.3337	0.934132	0.996184	NoPuro	2	0.955351	14	67.5805
13	5	67.3417	1.08434	1.02427	CHX-Puro	3	1.18064	14	67.5805
9	10	67.3479	2.0137	1.01138	CHX-Puro	2	1.06168	14	67.5805
27	9	67.3988	0.979592	0.990831	NoPuro	1	1.01982	14	67.5805
13	7	67.4096	1.30909	0.998861	EMT-Puro	2	0.893785	14	67.5805
18	7	67.4772	1.26829	0.949296	CHX-Puro	1	1.11122	14	67.5805
33	9	67.4858	1.19481	1.01385	EMT-Puro	1	1.13814	14	67.5805
12	1	67.5653	0.666667	1.03334	Puro	3	1.00954	14	67.5805
13	9	67.5805	0.876494	0.937406	NoPuro	3	0.949675	14	67.5805
12	11	67.5994	0.909091	0.972505	EMT-Puro	4	1.01716	14	67.5805
11	6	67.6643	0.793814	1.00167	EMT-Puro	3	1.01632	14	67.5805
28	1	67.7126	1.13684	0.967685	NoPuro	1	1.03083	14	67.5805
13	6	67.7617	1.46154	1.03161	CHX-Puro	3	1.24987	14	67.5805
9	11	67.7674	1.04103	0.982362	CHX-Puro	2	1.06527	14	67.5805
13	8	67.7879	1.10769	1.00659	EMT-Puro	2	0.936372	14	67.5805
18	8	67.8684	0.65	0.999324	CHX-Puro	1	1.06125	14	67.5805
28	2	67.983	0.855615	0.955635	NoPuro	1	1.01382	14	67.5805
14	1	68.0148	1.0566	0.951092	NoPuro	3	0.961256	14	67.5805
11	7	68.08	1.14655	0.991226	EMT-Puro	3	1.04388	14	67.5805
34	2	68.155	1.48387	0.985022	EMT-Puro	1	1.2302	14	67.5805
13	7.2	68.1657	1.46739	1.01663	CHX-Puro	3	1.26943	14	67.5805
13	7.1	68.1657	0.209302	0.980187	CHX-Puro	3	1.12292	14	67.5805
15	3	68.1945	1.08333	0.980947	NoPuro	2	0.991462	14	67.5805
13	9.2	68.202	1.17391	1.00121	EMT-Puro	2	0.97524	14	67.5805
13	9.1	68.202	0.954545	1.00703	EMT-Puro	2	0.995695	14	67.5805
28	3.2	68.2566	1.36245	0.980638	NoPuro	1	1.05575	14	67.5805
28	3.1	68.2566	1.23077	0.987641	NoPuro	1	1.07019	14	67.5805
18	9	68.2729	0.54491	0.992379	CHX-Puro	1	0.99291	14	67.5805
14	2	68.3899	1.40782	1.00534	NoPuro	3	1.02754	14	67.5805
13	1.3	68.4358	0.214286	1.02171	EMT-Puro	4	0.887867	14	67.5805
13	1.1	68.4358	0.617143	0.971631	EMT-Puro	4	0.97887	14	67.5805
13	1.2	68.4358	1.05319	1.02978	EMT-Puro	4	0.981332	14	67.5805
34	3	68.4367	1.19622	0.970421	EMT-Puro	1	1.081	14	67.5805
28	4	68.5138	1.13684	0.985633	NoPuro	1	1.05756	14	67.5805
13	8	68.5494	0.558621	1.00222	CHX-Puro	3	1.06085	14	67.5805
13	10	68.6246	1.02685	1.00341	EMT-Puro	2	1.01301	14	67.5805
34	4	68.7281	0.993827	0.980773	EMT-Puro	1	1.03199	14	67.5805
28	5	68.7941	0.947368	0.972352	NoPuro	1	1.05537	14	67.5805
15	4	68.8303	0.855967	0.983232	NoPuro	2	0.99143	14	67.5805
11	9	68.8515	0.83871	1.03038	EMT-Puro	3	1.01268	14	67.5805
10	1	68.8787	1.53191	0.975823	CHX-Puro	2	1.1674	14	67.5805
19	1	68.8818	0.740741	0.982065	CHX-Puro	1	0.956009	14	67.5805
34	5	69.021	0.693151	0.95298	EMT-Puro	1	0.959935	14	67.5805
12	2	69.0609	0.875	1.00116	Puro	3	0.982752	14	67.5805
28	6	69.0646	1.08562	1.04018	NoPuro	1	1.06346	14	67.5805
14	1	69.107	0.825	0.99149	EMT-Puro	2	0.996699	14	67.5805
14	4	69.2051	1.2071	0.993094	NoPuro	3	1.08032	14	67.5805
15	5	69.2501	0.821429	0.985261	NoPuro	2	0.996192	14	67.5805
13	3	69.2532	0.642857	0.932031	EMT-Puro	4	0.837867	14	67.5805
19	2	69.2707	1.24294	0.991225	CHX-Puro	1	0.917803	14	67.5805
34	6	69.2964	0.683333	0.945849	EMT-Puro	1	0.914688	14	67.5805
28	7	69.3276	1.11628	0.963931	NoPuro	1	1.08225	14	67.5805
34	7	69.5476	0.383333	1.00751	EMT-Puro	1	0.845898	14	67.5805
28	8.1	69.6062	0.928433	0.985016	NoPuro	1	1.07713	14	67.5805
28	8.2	69.6062	0.971098	1.01332	NoPuro	1	1.08225	14	67.5805
14	5	69.6207	1.27059	0.994175	NoPuro	3	1.05989	14	67.5805
11	11	69.6437	0.767123	0.995637	EMT-Puro	3	1.00486	14	67.5805
15	6	69.6968	1.01695	1.00813	NoPuro	2	0.990891	14	67.5805
10	3	69.7186	0.936306	0.999615	CHX-Puro	2	1.14956	14	67.5805
34	8	69.8122	1.03265	0.953585	EMT-Puro	1	0.879163	14	67.5805
28	9	69.9007	0.904239	0.991095	NoPuro	1	1.05387	14	67.5805
14	2.1	69.9883	1.21951	1.00522	EMT-Puro	2	1.01418	14	67.5805
14	2.2	69.9883	0.869565	0.984359	EMT-Puro	2	0.999857	14	67.5805
11	12	70.0188	0.784906	1.04172	EMT-Puro	3	0.980914	14	67.5805
19	4	70.0538	0.646707	0.906869	CHX-Puro	1	0.912413	15	72.5089
34	9	70.0946	1.79221	1.02882	EMT-Puro	1	1.03922	15	72.5089
15	7	70.1301	0.857143	0.993635	NoPuro	2	0.980177	15	72.5089
29	1	70.2145	1.38947	0.967372	NoPuro	1	1.10726	15	72.5089
13	9	70.2873	0.794118	1.0289	CHX-Puro	3	1.02556	15	72.5089
11	13	70.4115	0.731707	1.13918	EMT-Puro	3	0.966967	15	72.5089
14	6	70.4507	0.712871	0.996122	NoPuro	3	1.04597	15	72.5089
29	2	70.4876	0.983957	0.951261	NoPuro	1	1.06941	15	72.5089
13	10	70.6683	0.873786	1.00914	CHX-Puro	3	0.999346	15	72.5089
29	3.2	70.7608	0.838428	0.979775	NoPuro	1	1.0088	15	72.5089
29	3.1	70.7608	0.923077	0.985361	NoPuro	1	1.03864	15	72.5089
35	2	70.7635	0.741935	0.982334	EMT-Puro	1	1.01953	15	72.5089
13	5	70.8198	1.02857	1.03542	EMT-Puro	4	0.848153	15	72.5089
19	6	70.8616	0.92126	0.968306	CHX-Puro	1	0.871206	15	72.5089
14	7	70.8728	0.811475	1.01326	NoPuro	3	1.04242	15	72.5089
7	4	70.8776	0.857143	0.999006	Puro	2	0.970204	15	72.5089
12	1	70.9009	0.626638	1.0317	EMT-Puro	3	0.908202	15	72.5089
29	4	71.0206	1.03579	0.98165	NoPuro	1	1.01764	15	72.5089
35	3	71.0426	0.761229	0.954169	EMT-Puro	1	0.976176	15	72.5089
10	4	71.1704	1.07104	0.989047	CHX-Puro	2	1.14956	15	72.5089
13	6	71.2152	0.72	0.989299	EMT-Puro	4	0.824153	15	72.5089
11	7.1	71.234	1.03448	0.997003	Puro	1	1.03706	15	72.5089
11	7.2	71.234	1.17647	0.978112	Puro	1	1.00258	15	72.5089
19	7	71.2524	0.634146	0.929168	CHX-Puro	1	0.835186	15	72.5089
14	8	71.2831	0.759868	0.984734	NoPuro	3	1.02335	15	72.5089
7	5	71.2896	1.55172	0.992686	Puro	2	1.0271	15	72.5089
12	2	71.2937	0.785714	1.01697	EMT-Puro	3	0.868312	15	72.5089
29	5	71.3034	0.868421	0.993744	NoPuro	1	0.99592	15	72.5089
15	9	71.319	1.37656	1.00727	NoPuro	2	1.01614	15	72.5089
35	4	71.3323	1.1358	0.973665	EMT-Puro	1	0.941369	15	72.5089
14	2	71.4905	0.791209	1.03013	CHX-Puro	3	0.949896	15	72.5089
10	5	71.5611	1.15534	0.986212	CHX-Puro	2	1.13597	15	72.5089
29	6	71.5723	1.16317	0.98255	NoPuro	1	1.00061	15	72.5089
35	5	71.6087	0.50411	0.95658	EMT-Puro	1	0.872158	15	72.5089
12	3	71.6544	1.57143	0.965825	Puro	3	1.03199	15	72.5089
14	9	71.6961	0.525896	0.995466	NoPuro	3	0.949714	15	72.5089
12	3	71.7025	1.18462	0.998681	EMT-Puro	3	0.865035	15	72.5089
7	6	71.7266	1.13043	1.02027	Puro	2	1.05319	15	72.5089
16	1	71.7933	1.05556	1.00446	NoPuro	2	1.00741	15	72.5089
29	7	71.8423	0.893023	0.971376	NoPuro	1	0.992801	15	72.5089
35	6	71.8981	0.766667	0.936461	EMT-Puro	1	0.849442	15	72.5089
14	3	71.911	0.830769	1.01288	CHX-Puro	3	0.908357	15	72.5089
10	6	71.9735	0.922727	1.00503	CHX-Puro	2	1.11688	15	72.5089
12	4	72.0743	0.855814	0.942757	Puro	3	0.989791	15	72.5089
19	8	72.0878	0.975	0.986438	CHX-Puro	1	0.803344	15	72.5089
12	4	72.1017	0.836957	1.00035	EMT-Puro	3	0.849674	15	72.5089
29	8.1	72.1214	1.39265	0.990972	NoPuro	1	1.03922	15	72.5089
29	8.2	72.1214	0.971098	1.00553	NoPuro	1	1.04591	15	72.5089
15	1	72.1317	0.603774	0.948512	NoPuro	3	0.923249	15	72.5089
35	7	72.1473	2.68333	0.959057	EMT-Puro	1	1.04846	15	72.5089
7	7	72.16	0.894737	0.996763	Puro	2	1.04792	15	72.5089
13	8	72.2002	0.409091	1.01826	EMT-Puro	4	0.72188	15	72.5089
14	3.2	72.298	0.941704	0.964046	EMT-Puro	2	1.0864	15	72.5089
14	3.1	72.298	1.22905	0.996799	EMT-Puro	2	1.06569	15	72.5089
14	4	72.3015	0.73125	1.02987	CHX-Puro	3	0.880232	15	72.5089
10	7	72.347	0.666667	1.01382	CHX-Puro	2	1.12521	15	72.5089
29	9	72.412	0.941915	0.992859	NoPuro	1	1.00115	15	72.5089
35	8	72.4226	0.563265	0.949822	EMT-Puro	1	1.03645	15	72.5089
19	9	72.4865	1.01198	0.946118	CHX-Puro	1	0.863597	15	72.5089
12	5	72.5024	0.924528	1.00232	EMT-Puro	3	0.862745	15	72.5089
15	2	72.5089	1.13966	1.0006	NoPuro	3	0.949566	15	72.5089
12	5	72.527	1.16667	1.02335	Puro	3	1.0044	15	72.5089
7	8	72.5905	1.18033	1.00859	Puro	2	1.08727	15	72.5089
13	9	72.6009	0.926471	1.00158	EMT-Puro	4	0.735115	15	72.5089
14	4	72.6918	0.219512	1.00355	EMT-Puro	2	0.956734	15	72.5089
35	9	72.707	1.49351	0.986076	EMT-Puro	1	1.14747	15	72.5089
10	8	72.7306	0.915033	0.996437	CHX-Puro	2	1.15037	15	72.5089
30	1	72.7333	1.01053	0.954592	NoPuro	1	1.00381	15	72.5089
20	1	72.8732	0.592593	0.980772	CHX-Puro	1	0.796027	15	72.5089
12	6	72.8888	0.649485	1.0062	EMT-Puro	3	0.813038	15	72.5089
7	9	72.9731	1.38462	1.02793	Puro	2	1.11804	15	72.5089
14	5	72.9739	1.3012	1.00965	CHX-Puro	3	0.901919	15	72.5089
13	10	72.982	0.657439	1.00463	EMT-Puro	4	0.717814	15	72.5089
30	2	73.0069	1.06952	0.97576	NoPuro	1	1.01845	15	72.5089
12	6	73.0109	1.21811	1.06545	Puro	3	1.05884	15	72.5089
14	5	73.0855	0.765957	0.978415	EMT-Puro	2	0.922561	15	72.5089
10	9	73.1235	1.25	0.981182	CHX-Puro	2	1.15037	15	72.5089
16	2	73.2243	1.16766	0.992686	NoPuro	2	1.02243	15	72.5089
20	2	73.252	0.745763	0.985089	CHX-Puro	1	0.805603	15	72.5089
30	3.2	73.2764	1.25764	0.977949	NoPuro	1	1.06962	15	72.5089
30	3.1	73.2764	1.12821	0.986397	NoPuro	1	1.04743	15	72.5089
15	4	73.3209	1.34911	1.00438	NoPuro	3	0.978817	15	72.5089
36	2	73.3699	0.494624	0.972402	EMT-Puro	1	1.09367	15	72.5089
13	11	73.3865	1.21212	0.967965	EMT-Puro	4	0.748117	15	72.5089
12	7	73.415	1.17895	1.04784	Puro	3	1.10401	15	72.5089
30	4	73.5249	1.44	0.985537	NoPuro	1	1.12677	15	72.5089
7	10	73.6622	1.46939	1.00446	Puro	2	1.16702	15	72.5089
36	3	73.6639	1.0331	0.944694	EMT-Puro	1	1.01776	15	72.5089
15	5	73.7334	1.27059	0.983554	NoPuro	3	0.965094	15	72.5089
30	5	73.8114	0.789474	0.98484	NoPuro	1	1.08941	15	72.5089
14	6	73.8134	1.30769	1.00338	CHX-Puro	3	0.886534	15	72.5089
14	7	73.8736	1.47273	1.00517	EMT-Puro	2	0.952442	15	72.5089
36	4	73.9505	0.638889	0.968015	EMT-Puro	1	1.00745	15	72.5089
12	7	74.0005	0.905172	1.02022	EMT-Puro	3	0.819685	15	72.5089
20	4	74.0441	0.790419	0.953255	CHX-Puro	1	0.830154	15	72.5089
30	6	74.0787	1.12439	0.982612	NoPuro	1	1.11254	15	72.5089
7	11	74.1505	1.4717	1.02625	Puro	2	1.18966	15	72.5089
10	10	74.1536	1.05479	0.993074	CHX-Puro	2	1.05448	15	72.5089
14	7.1	74.2266	1.04651	0.984082	CHX-Puro	3	0.95069	15	72.5089
14	7.2	74.2266	1.27174	1.01609	CHX-Puro	3	0.866969	15	72.5089
36	5	74.2403	0.630137	0.960534	EMT-Puro	1	0.994343	15	72.5089
11	8	74.2547	0.631579	0.970038	Puro	1	1.01199	15	72.5089
14	8	74.2562	0.553846	1.00428	EMT-Puro	2	0.912372	15	72.5089
30	7	74.3471	1.33953	0.990859	NoPuro	1	1.10723	15	72.5089
15	6	74.4444	1.06931	0.991473	NoPuro	3	0.951315	15	72.5089
36	6	74.5295	0.566667	0.930516	EMT-Puro	1	0.937429	15	72.5089
12	8	74.5412	0.969697	1.00396	Puro	3	1.05921	15	72.5089
10	11	74.5645	1.04103	0.954936	CHX-Puro	2	1.05448	15	72.5089
30	8.2	74.6272	0.693642	0.995209	NoPuro	1	1.06885	15	72.5089
30	8.1	74.6272	0.83559	0.978338	NoPuro	1	1.09368	15	72.5089
14	8	74.6323	0.434483	1.00012	CHX-Puro	3	0.938276	15	72.5089
14	9.1	74.6827	0.75	1.00635	EMT-Puro	2	0.884687	15	72.5089
14	9.2	74.6827	1.04348	1.00184	EMT-Puro	2	0.906535	15	72.5089
36	7	74.7711	0.766667	1.00141	EMT-Puro	1	0.963685	15	72.5089
16	3	74.7839	1.08333	0.974814	NoPuro	2	1.02521	15	72.5089
14	1.3	74.8073	0.571429	1.00412	EMT-Puro	4	0.705084	15	72.5089
14	1.1	74.8073	0.668571	0.970709	EMT-Puro	4	0.75326	15	72.5089
14	1.2	74.8073	0.861702	1.02237	EMT-Puro	4	0.769825	15	72.5089
15	7	74.8634	1.2623	1.01662	NoPuro	3	0.950485	15	72.5089
30	9	74.9211	0.904239	0.992364	NoPuro	1	1.05822	15	72.5089
12	9	74.9446	1.41772	1.11065	Puro	3	1.10235	15	72.5089
36	8	75.0433	0.844898	0.951796	EMT-Puro	1	0.971508	16	77.4025
12	1	75.1397	0.606061	0.991004	Puro	1	1.01996	16	77.4025
16	4	75.1975	0.855967	0.993612	NoPuro	2	1.01739	16	77.4025
14	10	75.2064	0.362416	1.00595	EMT-Puro	2	0.85582	16	77.4025
31	1	75.2343	0.884211	0.956011	NoPuro	1	1.03969	16	77.4025
15	8	75.2746	0.940789	0.980886	NoPuro	3	0.973277	16	77.4025
12	10	75.3229	0.767123	1.01249	Puro	3	1.06872	16	77.4025
36	9	75.3389	0.298701	1.01216	EMT-Puro	1	0.733045	16	77.4025
20	6	75.4978	0.818898	0.976407	CHX-Puro	1	0.83797	16	77.4025
31	2	75.5139	1.1123	0.95142	NoPuro	1	1.0381	16	77.4025
12	2	75.5624	1.03226	0.999192	Puro	1	0.986823	16	77.4025
14	3	75.6259	0.785714	0.983641	EMT-Puro	4	0.784111	16	77.4025
15	9	75.6886	0.920319	0.995755	NoPuro	3	0.984161	16	77.4025
15	1	75.7055	0.45	0.986933	EMT-Puro	2	0.778869	16	77.4025
31	3.1	75.7807	1.94872	0.983582	NoPuro	1	1.02609	16	77.4025
31	3.2	75.7807	0.628821	0.972623	NoPuro	1	0.97522	16	77.4025
11	1	75.7889	1.14894	0.99113	CHX-Puro	2	1.01619	16	77.4025
12	9	75.8565	0.419355	0.876137	EMT-Puro	3	0.784908	16	77.4025
16	5	75.8823	0.714286	0.992329	NoPuro	2	0.980485	16	77.4025
20	7	75.9013	1.10976	0.911178	CHX-Puro	1	0.824652	16	77.4025
12	3	75.9743	0.754717	1.00588	Puro	1	0.965521	16	77.4025
37	2	76.0115	0.741935	0.975932	EMT-Puro	1	0.750912	16	77.4025
31	4	76.0449	1.03579	0.985843	NoPuro	1	1.05072	16	77.4025
15	2.1	76.1019	0.853659	1.00498	EMT-Puro	2	0.770065	16	77.4025
15	2.2	76.1019	0.790514	1.00339	EMT-Puro	2	0.726211	16	77.4025
16	1	76.1261	0.754717	0.957221	NoPuro	3	0.983646	16	77.4025
12	11	76.1602	1.01149	1.0145	Puro	3	1.1032	16	77.4025
37	3	76.2762	0.706856	0.941987	EMT-Puro	1	0.672247	16	77.4025
20	8	76.2935	1.3	0.97893	CHX-Puro	1	0.889981	16	77.4025
31	5	76.3169	0.789474	0.990414	NoPuro	1	1.01723	16	77.4025
14	9	76.3248	0.705882	1.03775	CHX-Puro	3	0.929453	16	77.4025
16	6	76.3275	0.949153	1.00852	NoPuro	2	0.989804	16	77.4025
12	4	76.3723	1.40127	1.03025	Puro	1	0.99244	16	77.4025
16	2	76.5012	1.40782	1.00179	NoPuro	3	1.07184	16	77.4025
37	4	76.5626	0.567901	0.958324	EMT-Puro	1	0.679575	16	77.4025
31	6	76.5865	0.891761	1.02569	NoPuro	1	0.972454	16	77.4025
13	1	76.5914	1.66667	1.03517	Puro	3	1.18237	16	77.4025
12	11	76.6511	0.657534	1.01426	EMT-Puro	3	0.772171	16	77.4025
11	3	76.6807	1.07006	0.996483	CHX-Puro	2	1.02956	16	77.4025
20	9	76.6968	0.467066	0.942154	CHX-Puro	1	0.844562	16	77.4025
14	10	76.7063	1.2233	0.858147	CHX-Puro	3	0.964404	16	77.4025
14	5	76.7194	0.925714	0.996732	EMT-Puro	4	0.773825	16	77.4025
16	7	76.7592	1.80952	0.985349	NoPuro	2	1.08861	16	77.4025
12	5	76.7853	1.26126	1.01529	Puro	1	0.997547	16	77.4025
37	5	76.8459	0.567123	0.96218	EMT-Puro	1	0.632977	16	77.4025
31	7	76.8516	1.11628	0.993999	NoPuro	1	1.00052	16	77.4025
12	12	77.023	0.845283	1.01743	EMT-Puro	3	0.783528	16	77.4025
21	1	77.0874	0.444444	1.0023	CHX-Puro	1	0.825591	16	77.4025
11	4	77.1155	1.22404	1.00472	CHX-Puro	2	1.04486	16	77.4025
14	6	77.1169	1.2	0.981555	EMT-Puro	4	0.821825	16	77.4025
37	6	77.1259	0.466667	0.91781	EMT-Puro	1	0.615755	16	77.4025
31	8.1	77.1291	0.928433	0.978729	NoPuro	1	1.024	16	77.4025
31	8.2	77.1291	1.10983	0.996471	NoPuro	1	1.04456	16	77.4025
12	6	77.1904	1.17647	1.01849	Puro	1	1.0251	16	77.4025
13	2	77.2249	0.875	1.00788	Puro	3	1.11272	16	77.4025
37	7	77.3814	1.53333	1.01129	EMT-Puro	1	0.706075	16	77.4025
31	9	77.4236	0.979592	0.99131	NoPuro	1	1.0541	16	77.4025
21	2	77.4781	0.745763	0.980395	CHX-Puro	1	0.802668	16	77.4025
11	5	77.5029	1.01942	0.964745	CHX-Puro	2	1.03127	16	77.4025
16	9	77.5708	0.927681	1.00352	NoPuro	2	1.07969	16	77.4025
13	3	77.6278	0.714286	0.978084	Puro	3	1.09857	16	77.4025
37	8	77.6455	0.469388	0.937168	EMT-Puro	1	0.696347	16	77.4025
32	1	77.7434	0.757895	0.95743	NoPuro	1	1.01866	16	77.4025
15	2	77.7987	0.89011	0.995207	CHX-Puro	3	0.974294	16	77.4025
11	6	77.9266	0.859091	0.998095	CHX-Puro	2	1.02491	16	77.4025
37	9	77.933	0.597403	0.997888	EMT-Puro	1	0.679421	16	77.4025
12	13	78.0071	0.439024	1.14736	EMT-Puro	3	0.764767	16	77.4025
13	4	78.0397	0.781395	0.913113	Puro	3	1.06004	16	77.4025
32	2	78.041	0.941176	0.943098	NoPuro	1	1.04989	16	77.4025
16	4	78.1669	1.13609	0.98592	NoPuro	3	1.12507	16	77.4025
15	3	78.2166	1.93846	0.998526	CHX-Puro	3	1.08506	16	77.4025
21	4	78.2663	0.934132	0.92935	CHX-Puro	1	0.794883	16	77.4025
11	7	78.3065	1.08333	1.00624	CHX-Puro	2	1.06657	16	77.4025
32	3.1	78.312	0.615385	0.986101	NoPuro	1	0.916561	16	77.4025
32	3.2	78.312	1.36245	0.982006	NoPuro	1	0.949227	16	77.4025
17	1	78.4258	0.833333	0.988785	NoPuro	2	1.07731	16	77.4025
13	5	78.5168	1.44444	1.0221	Puro	3	1.08268	16	77.4025
32	4	78.5643	1.08632	0.983577	NoPuro	1	0.978911	16	77.4025
15	4	78.6061	1.4625	1.02377	CHX-Puro	3	1.15819	16	77.4025
38	2	78.6153	0.741935	0.970094	EMT-Puro	1	0.669124	16	77.4025
11	8	78.6896	0.869281	0.982812	CHX-Puro	2	1.062	16	77.4025
13	1	78.7187	0.687773	1.00388	EMT-Puro	3	0.754973	16	77.4025
14	8	78.8082	0.613636	1.02345	EMT-Puro	4	0.84228	16	77.4025
32	5	78.8353	1.18421	0.991078	NoPuro	1	1.00816	16	77.4025
17	2	78.8388	0.700599	0.998842	NoPuro	2	1.00971	16	77.4025
38	3	78.8943	0.489362	0.928863	EMT-Puro	1	0.68819	16	77.4025
16	5	78.9648	0.847059	1.00816	NoPuro	3	1.09581	16	77.4025
13	6	79.0046	1.28395	1.07594	Puro	3	1.09318	16	77.4025
15	5	79.0091	1.08434	1.00925	CHX-Puro	3	1.1365	16	77.4025
21	6	79.0699	0.614173	0.975164	CHX-Puro	1	0.797041	16	77.4025
32	6	79.1063	1.12439	1.00075	NoPuro	1	1.00897	16	77.4025
13	2	79.1163	0.714286	1.01788	EMT-Puro	3	0.70794	16	77.4025
38	4	79.174	0.425926	0.95338	EMT-Puro	1	0.656589	16	77.4025
14	9	79.2213	0.595588	1.02051	EMT-Puro	4	0.809192	16	77.4025
17	3	79.2214	1.39286	0.974284	NoPuro	2	1.04344	16	77.4025
15	3.1	79.2619	0.502793	1.00074	EMT-Puro	2	0.754539	16	77.4025
15	3.2	79.2619	0.627803	0.957059	EMT-Puro	2	0.740724	16	77.4025
32	7	79.3774	0.446512	0.985326	NoPuro	1	0.960775	16	77.4025
16	6	79.402	0.475248	1.00087	NoPuro	3	1.00842	16	77.4025
13	7	79.4101	1.01053	1.0184	Puro	3	1.09726	16	77.4025
38	5	79.4568	0.630137	0.963798	EMT-Puro	1	0.648917	16	77.4025
21	7	79.4673	0.792683	0.909639	CHX-Puro	1	0.801733	16	77.4025
17	4	79.6335	0.855967	0.98546	NoPuro	2	1.01227	16	77.4025
32	8.2	79.6484	1.80347	1.00933	NoPuro	1	1.03014	16	77.4025
32	8.1	79.6484	1.34623	0.985761	NoPuro	1	1.0668	16	77.4025
15	4	79.6515	0	0.988631	EMT-Puro	2	0.593451	16	77.4025
11	9	79.6727	1.5	0.972129	CHX-Puro	2	1.087	16	77.4025
38	6	79.737	0.5	0.911654	EMT-Puro	1	0.642127	16	77.4025
21	8	79.8654	1.3	0.975503	CHX-Puro	1	0.852691	16	77.4025
32	9	79.935	1.1303	0.995195	NoPuro	1	1.10404	16	77.4025
38	7	79.9824	0.383333	0.987399	EMT-Puro	1	0.623748	16	77.4025
13	3	80.013	0.592308	0.974592	EMT-Puro	3	0.683475	16	77.4025
15	5	80.0565	0.574468	0.925989	EMT-Puro	2	0.595513	17	82.5723
11	10	80.0932	0.958904	0.96887	CHX-Puro	2	1.07741	17	82.5723
38	8	80.2544	0.469388	0.923286	EMT-Puro	1	0.62402	17	82.5723
33	1	80.2582	0.631579	0.952211	NoPuro	1	1.07308	17	82.5723
13	8	80.2637	0.909091	0.99573	Puro	3	1.0464	17	82.5723
21	9	80.2716	0.778443	0.928295	CHX-Puro	1	0.848646	17	82.5723
15	6	80.289	1.23077	1.00863	CHX-Puro	3	1.12881	17	82.5723
17	5	80.3316	1	0.974897	NoPuro	2	1.00394	17	82.5723
11	11	80.4983	0.861538	0.976532	CHX-Puro	2	1.05946	17	82.5723
33	2	80.5437	1.1123	0.946531	NoPuro	1	1.12278	17	82.5723
38	9	80.552	0.896104	0.994719	EMT-Puro	1	0.560298	17	82.5723
13	9	80.6468	1.82278	1.10495	Puro	3	1.15196	17	82.5723
22	1	80.6573	0.592593	0.980254	CHX-Puro	1	0.79693	17	82.5723
15	7.2	80.7001	1.07609	1.03421	CHX-Puro	3	1.04645	17	82.5723
15	7.1	80.7001	0.418605	0.997019	CHX-Puro	3	1.0435	17	82.5723
17	6	80.7795	1.08475	1.00714	NoPuro	2	1.02681	17	82.5723
14	10	80.7926	0.553633	0.97541	EMT-Puro	4	0.798811	17	82.5723
33	3.1	80.8131	1.53846	0.985407	NoPuro	1	1.12607	17	82.5723
33	3.2	80.8131	0.943231	0.975605	NoPuro	1	1.08085	17	82.5723
15	7	80.8266	0.818182	1.00805	EMT-Puro	2	0.602331	17	82.5723
16	7	80.9472	1.17213	0.994566	NoPuro	3	0.998578	17	82.5723
12	1	80.983	1.14894	0.962168	CHX-Puro	2	1.05946	17	82.5723
13	10	81.0283	0.986301	0.962509	Puro	3	1.14944	17	82.5723
22	2	81.0356	1.11864	0.975331	CHX-Puro	1	0.778794	17	82.5723
33	4	81.0692	1.11158	0.977797	NoPuro	1	1.11881	17	82.5723
15	8	81.0858	0.806897	0.990228	CHX-Puro	3	1.08369	17	82.5723
13	4	81.1583	0.913043	0.991839	EMT-Puro	3	0.682326	17	82.5723
14	11	81.2019	0.681818	0.977492	EMT-Puro	4	0.745781	17	82.5723
17	7	81.2021	0.666667	0.990458	NoPuro	2	1.02205	17	82.5723
39	2	81.2164	0.247312	0.964631	EMT-Puro	1	0.53809	17	82.5723
33	5	81.3519	1.34211	0.978921	NoPuro	1	1.14058	17	82.5723
16	8	81.3677	0.796053	0.991571	NoPuro	3	0.971253	17	82.5723
8	1	81.3852	0.764706	0.998721	Puro	2	1.16613	17	82.5723
13	11	81.4375	1.1954	1.01802	Puro	3	1.10232	17	82.5723
15	9	81.4961	0.970588	1.03836	CHX-Puro	3	1.11017	17	82.5723
39	3	81.5045	0.434988	0.931352	EMT-Puro	1	0.521849	17	82.5723
13	5	81.5637	0.660377	1.00175	EMT-Puro	3	0.683416	17	82.5723
33	6	81.6166	1.16317	0.961004	NoPuro	1	1.21224	17	82.5723
15	1.3	81.6582	0.428571	0.992186	EMT-Puro	4	0.754364	17	82.5723
15	1.2	81.6582	1.24468	1.01727	EMT-Puro	4	0.797677	17	82.5723
15	1.1	81.6582	0.514286	0.985997	EMT-Puro	4	0.730352	17	82.5723
39	4	81.7857	0.709877	0.953646	EMT-Puro	1	0.518643	17	82.5723
16	9	81.7876	1.09562	1.00476	NoPuro	3	0.954585	17	82.5723
33	7	81.8904	0.55814	0.973914	NoPuro	1	1.08771	17	82.5723
39	5	82.0684	0.50411	0.958478	EMT-Puro	1	0.520117	17	82.5723
33	8.1	82.1614	0.510638	0.983994	NoPuro	1	1.00415	17	82.5723
33	8.2	82.1614	1.66474	1.00455	NoPuro	1	1.05759	17	82.5723
15	10	82.3009	1.39806	1.00942	CHX-Puro	3	1.12764	17	82.5723
15	8	82.334	1.38462	0.998879	EMT-Puro	2	0.636445	17	82.5723
39	6	82.3398	0.616667	0.924371	EMT-Puro	1	0.539191	17	82.5723
17	9	82.3899	1.10723	0.997779	NoPuro	2	1.03786	17	82.5723
12	3	82.4185	0.579618	0.979237	CHX-Puro	2	1.01042	17	82.5723
33	9	82.4619	1.31868	0.991395	NoPuro	1	1.1263	17	82.5723
15	3	82.4735	0.928571	0.956864	EMT-Puro	4	0.76865	17	82.5723
14	1	82.5567	1.33333	1.02037	Puro	3	1.14815	17	82.5723
39	7	82.588	0.958333	1.00755	EMT-Puro	1	0.572011	17	82.5723
15	9.2	82.7699	0.652174	0.996697	EMT-Puro	2	0.674966	17	82.5723
15	9.1	82.7699	0.545455	1.00157	EMT-Puro	2	0.654749	17	82.5723
34	1	82.7719	1.01053	0.965893	NoPuro	1	1.11613	17	82.5723
39	8	82.8563	0.0938776	0.914905	EMT-Puro	1	0.531399	17	82.5723
17	1	82.8763	0.830189	1.02275	NoPuro	3	0.943525	17	82.5723
22	4	83.0642	1.22156	0.971485	CHX-Puro	1	0.854243	17	82.5723
34	2	83.0648	1.15508	0.968575	NoPuro	1	1.13731	17	82.5723
16	2	83.1219	1.58242	1.00197	CHX-Puro	3	1.19687	17	82.5723
39	9	83.1359	0.597403	0.988221	EMT-Puro	1	0.552806	17	82.5723
15	10	83.3004	0.604027	1.00731	EMT-Puro	2	0.650003	17	82.5723
34	3.1	83.3326	1.23077	0.990857	NoPuro	1	1.05827	17	82.5723
34	3.2	83.3326	0.628821	0.976189	NoPuro	1	1.04635	17	82.5723
13	6	83.3353	0.43299	1.02991	EMT-Puro	3	0.636197	17	82.5723
18	1	83.3576	1.11111	1.00323	NoPuro	2	0.968019	17	82.5723
12	4	83.5109	1.18579	0.993843	CHX-Puro	2	1.00659	17	82.5723
34	4	83.5764	0.808421	0.981319	NoPuro	1	1.0049	17	82.5723
14	2	83.7293	0.729167	1.00418	Puro	3	1.14964	17	82.5723
13	7	83.7502	0.482759	0.976165	EMT-Puro	3	0.642538	17	82.5723
18	2	83.7738	1.16766	1.00341	NoPuro	2	0.992018	17	82.5723
16	1	83.7924	0.525	0.982988	EMT-Puro	2	0.623452	17	82.5723
16	3	83.805	0.969231	0.983318	CHX-Puro	3	1.09995	17	82.5723
40	2	83.836	0.494624	0.96715	EMT-Puro	1	0.555329	17	82.5723
34	5	83.8625	1.10526	0.997652	NoPuro	1	0.999108	17	82.5723
22	6	83.8805	0.511811	0.973308	CHX-Puro	1	0.86098	17	82.5723
8	2	84.0404	2	1.01009	Puro	2	1.27048	17	82.5723
40	3	84.1146	0.815603	0.940129	EMT-Puro	1	0.547279	17	82.5723
34	6	84.1281	0.930533	0.979305	NoPuro	1	1.03635	17	82.5723
14	3	84.1396	1.57143	0.969425	Puro	3	1.22864	17	82.5723
18	3	84.157	1.39286	0.979221	NoPuro	2	1.04797	17	82.5723
17	2	84.1618	1.34078	1.00805	NoPuro	3	0.985571	17	82.5723
16	2.2	84.1835	0.395257	0.997629	EMT-Puro	2	0.598698	17	82.5723
16	2.1	84.1835	0.487805	1.00141	EMT-Puro	2	0.621953	17	82.5723
16	4	84.1947	1.0125	1.02122	CHX-Puro	3	1.05495	17	82.5723
15	5	84.2065	0.72	0.993604	EMT-Puro	4	0.748079	17	82.5723
22	7	84.2867	0.95122	0.885279	CHX-Puro	1	0.881526	17	82.5723
34	7	84.3954	1.11628	0.969897	NoPuro	1	1.09691	17	82.5723
40	4	84.4037	0.638889	0.960928	EMT-Puro	1	0.586437	17	82.5723
12	5	84.493	1.08738	0.963381	CHX-Puro	2	1.01339	17	82.5723
13	9	84.5449	0.483871	1.00669	EMT-Puro	3	0.625171	17	82.5723
16	3.1	84.5491	0.614525	1.00572	EMT-Puro	2	0.660151	17	82.5723
16	3.2	84.5491	0.538117	0.973328	EMT-Puro	2	0.656516	17	82.5723
14	4	84.5534	0.967442	0.894476	Puro	3	1.18094	17	82.5723
18	4	84.5661	0.641975	0.986919	NoPuro	2	1.04211	17	82.5723
16	5	84.6067	1.08434	1.00485	CHX-Puro	3	1.05495	17	82.5723
34	8.1	84.6722	1.0677	0.986939	NoPuro	1	1.01632	17	82.5723
34	8.2	84.6722	1.10983	1.00081	NoPuro	1	1.04142	17	82.5723
40	5	84.6875	0.378082	0.954236	EMT-Puro	1	0.580746	17	82.5723
22	8	84.6917	2.275	0.975277	CHX-Puro	1	1.01561	17	82.5723
15	6	84.8167	1.08	0.9899	EMT-Puro	4	0.736079	17	82.5723
12	6	84.9167	0.763636	0.993256	CHX-Puro	2	1.00384	17	82.5723
16	4	84.9407	0.439024	0.994604	EMT-Puro	2	0.6186	17	82.5723
34	9	84.9561	1.35636	0.995394	NoPuro	1	1.0509	17	82.5723
40	6	84.9579	0.533333	0.918766	EMT-Puro	1	0.563092	17	82.5723
18	5	85.006	0.928571	0.978776	NoPuro	2	0.995679	17	82.5723
16	6	85.0341	1.30769	1.01016	CHX-Puro	3	1.06264	18	87.8591
22	9	85.1069	0.700599	0.938298	CHX-Puro	1	1.02425	18	87.8591
40	7	85.207	0.575	1.00303	EMT-Puro	1	0.570181	18	87.8591
35	1	85.2746	0.505263	0.96926	NoPuro	1	0.985923	18	87.8591
12	7	85.2966	1.25	1.00632	CHX-Puro	2	1.02051	18	87.8591
16	5	85.3461	0.670213	0.955462	EMT-Puro	2	0.54716	18	87.8591
16	7.1	85.4344	1.04651	0.979917	CHX-Puro	3	1.12543	18	87.8591
16	7.2	85.4344	1.56522	1.01675	CHX-Puro	3	1.17435	18	87.8591
18	6	85.4445	0.813559	1.00957	NoPuro	2	0.991438	18	87.8591
40	8	85.4797	0.0938776	0.923437	EMT-Puro	1	0.517902	18	87.8591
23	1	85.4949	0.592593	0.980744	CHX-Puro	1	1.00425	18	87.8591
35	2	85.5506	0.812834	0.954317	NoPuro	1	1.00432	18	87.8591
15	8	85.5952	0.818182	1.02428	EMT-Puro	4	0.756533	18	87.8591
12	8	85.6775	0.823529	0.9847	CHX-Puro	2	1.01593	18	87.8591
12	7.1	85.7162	1.03448	0.993665	Puro	1	0.952082	18	87.8591
12	7.2	85.7162	0.588235	1.00691	Puro	1	0.966281	18	87.8591
40	9	85.7545	0.298701	0.995315	EMT-Puro	1	0.451939	18	87.8591
[truncated: 8,793 more rows]

## Sheet: Figure 3D
Drug	Rep	t0.33	t0.5	t0.66
Puro	1	38.23	42.86	49.73
Puro	2	40.01	46.48	48.17
Puro	3	40.55	43.35	47.13
CHX-Puro	1	96.36	148.12	189.13
CHX-Puro	2	114.15	139.89	185.88
CHX-Puro	3	104.29	129.1	169.94
EMT-Puro	1	8.03	31.83	41.67
EMT-Puro	2	22.3	37.31	58.08
EMT-Puro	3	21.96	34.82	56.2
EMT-Puro	4	30.89	42	51.91
