# Supplementary figures and images for: Elongation inhibitors do not prevent the release of puromycylated nascent polypeptide chains from ribosomes
Source: eLife journal article supplement (doi:10.7554/elife.60048), 2020-08-26

**A**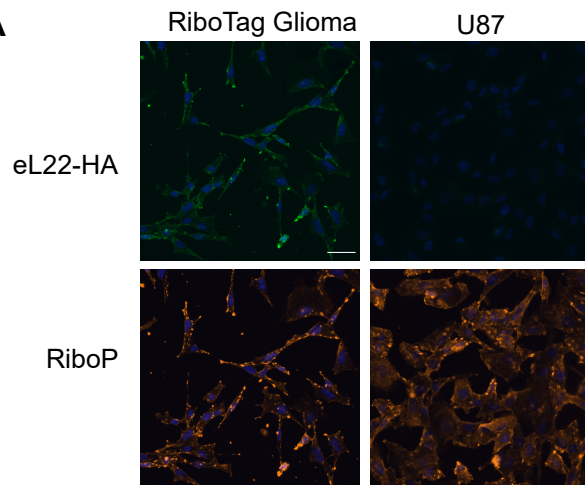**B**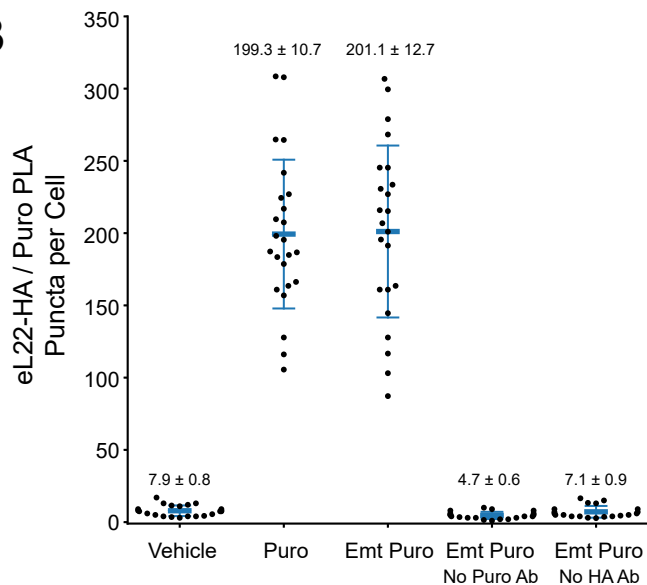**C**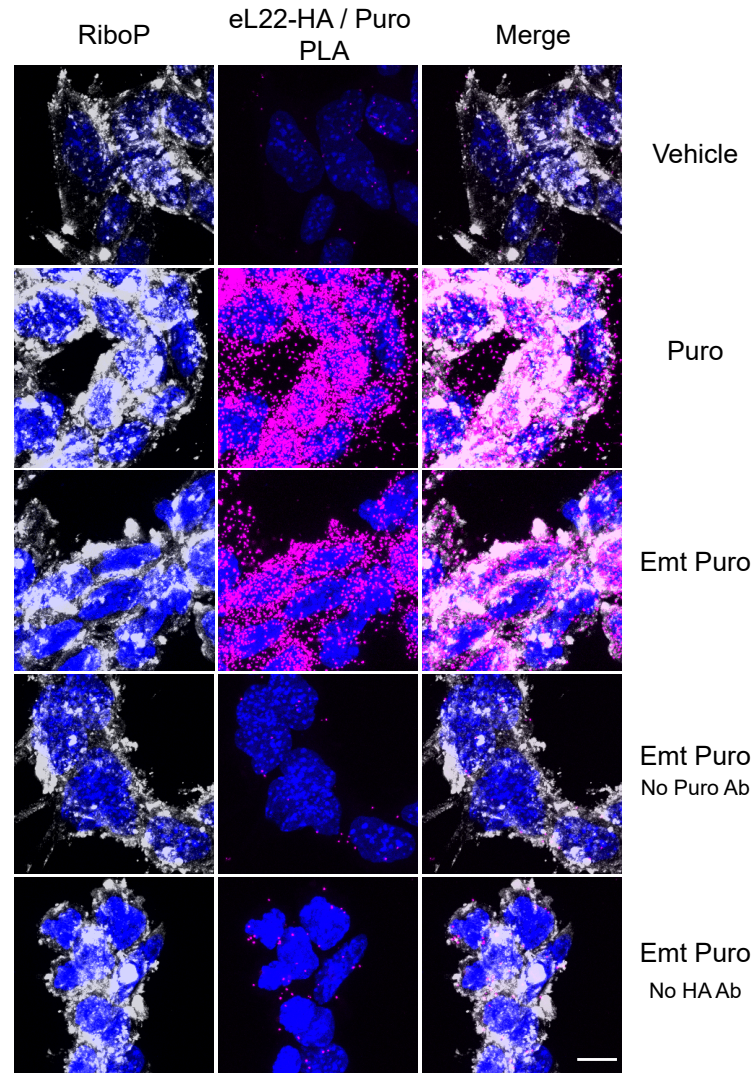

Supplement: supp [file elife-60048-supp-v1.zip › elife_poa_e60048_Figure_1_figure_supplement_1.pdf]

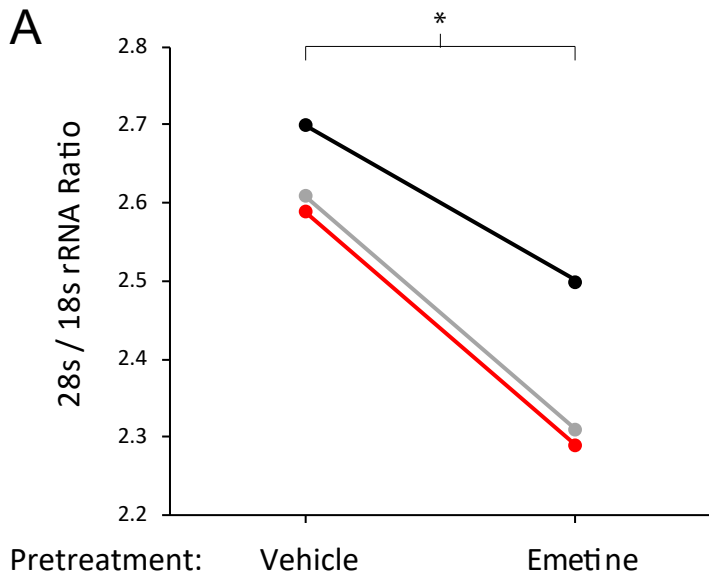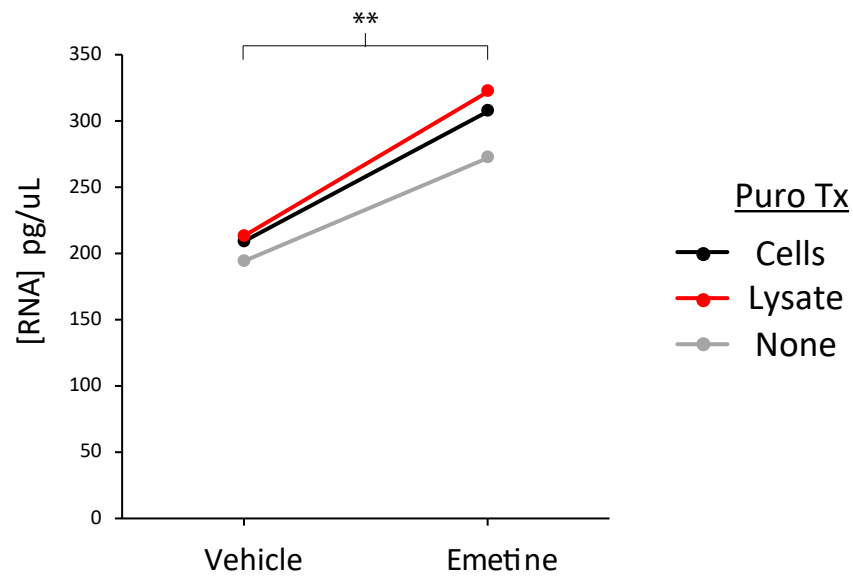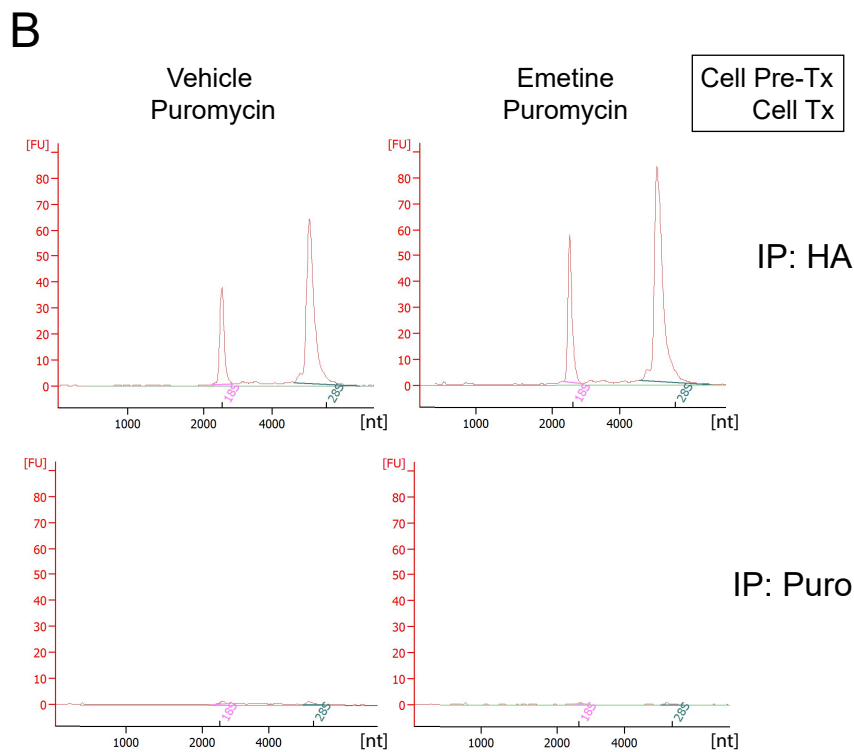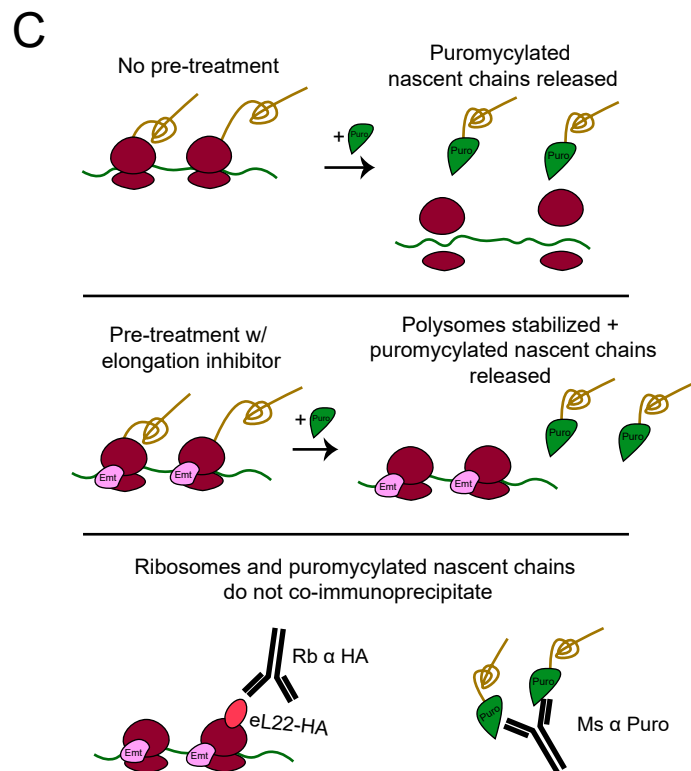

Supplement: supp [file elife-60048-supp-v1.zip › elife_poa_e60048_Figure_2_figure_supplement_1.pdf]

**A**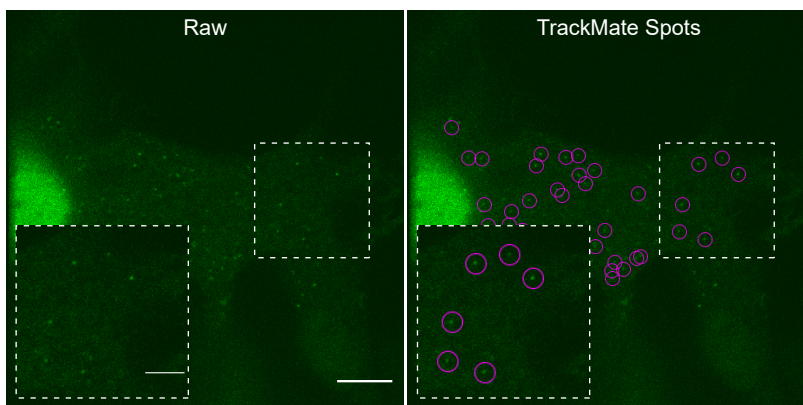**B**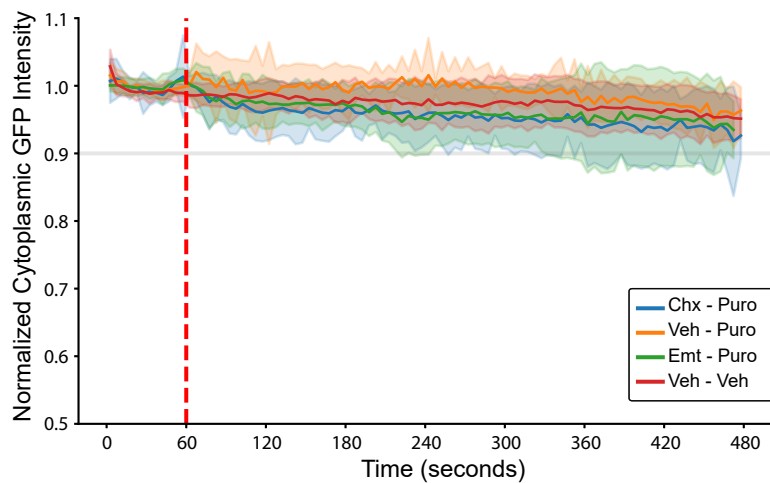**C**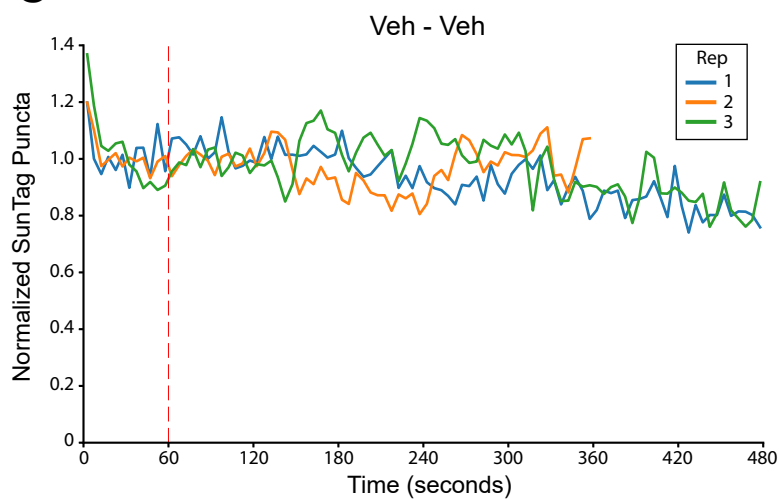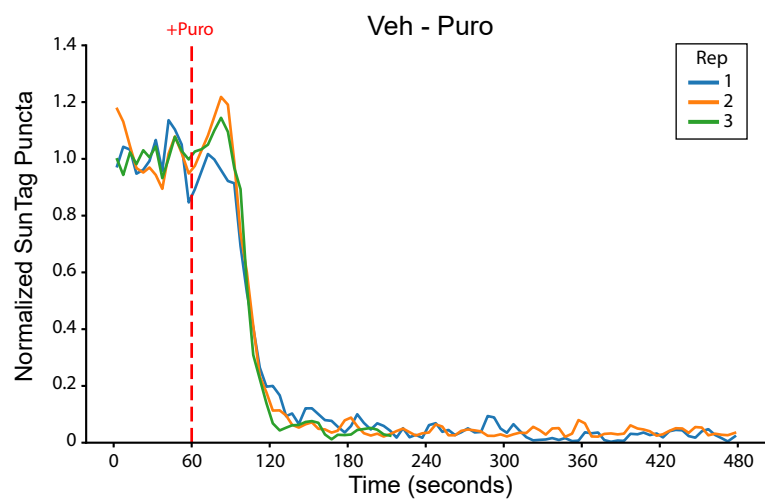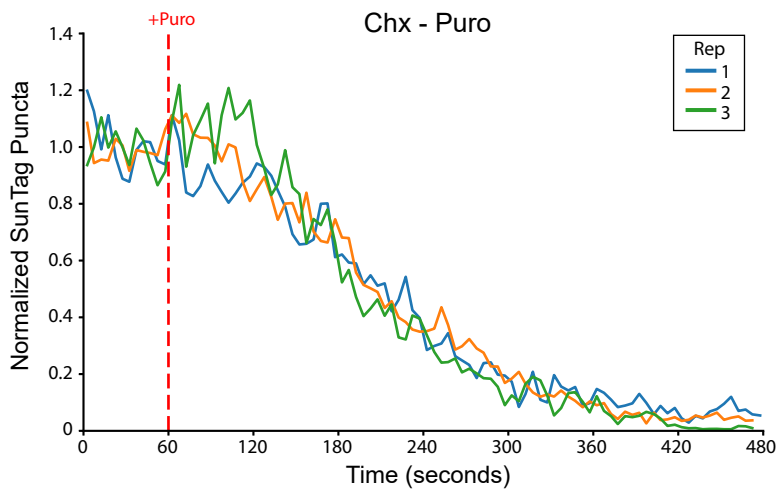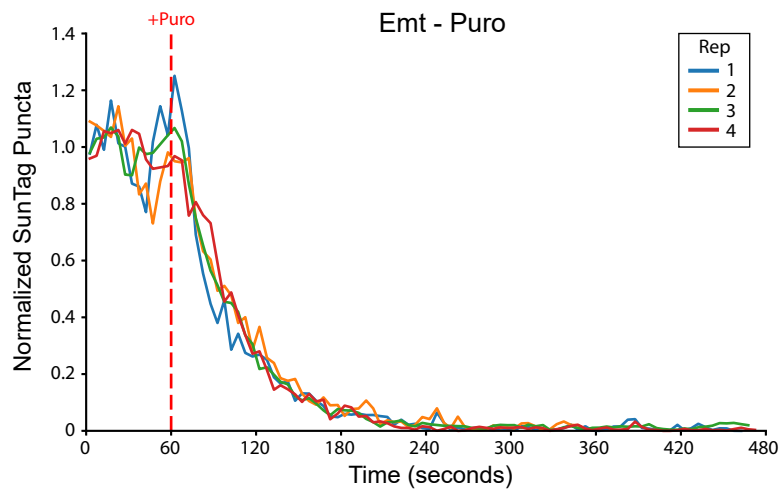

Supplement: supp [file elife-60048-supp-v1.zip › elife_poa_e60048_Figure_3_figure_supplement_1.pdf]

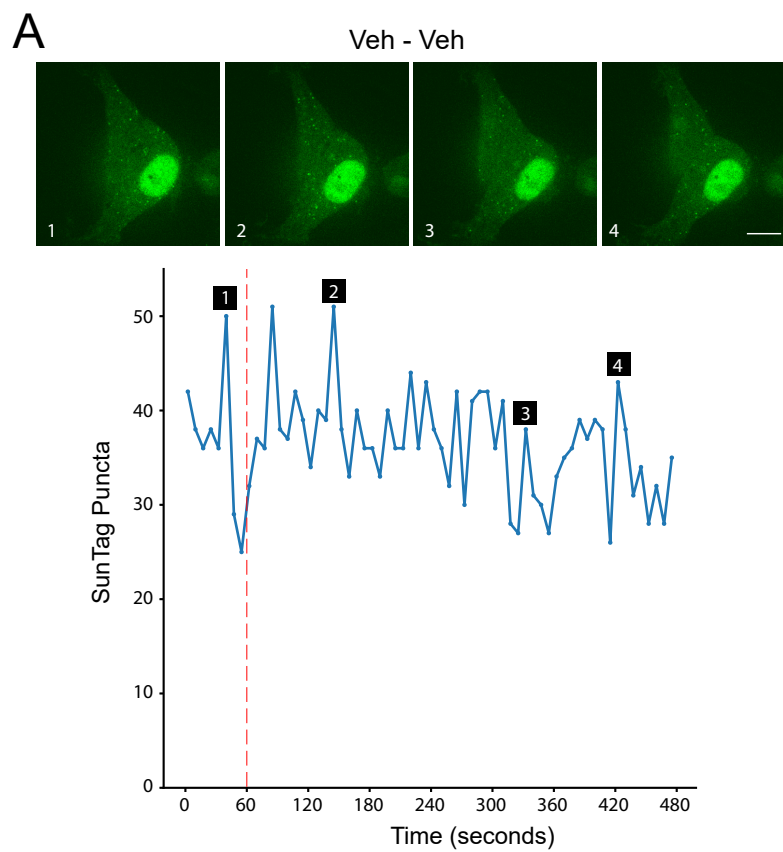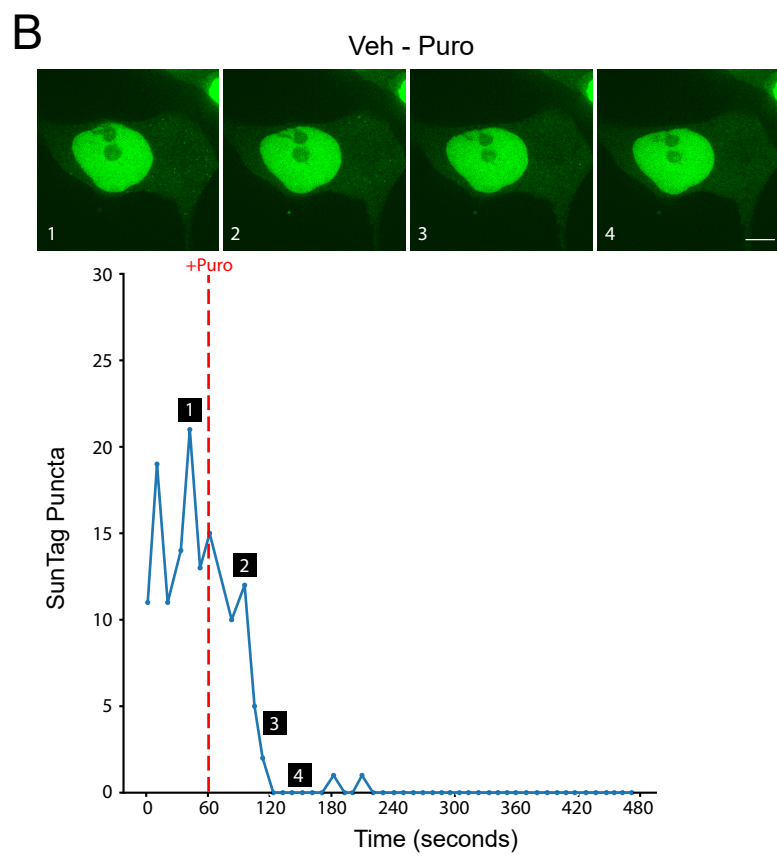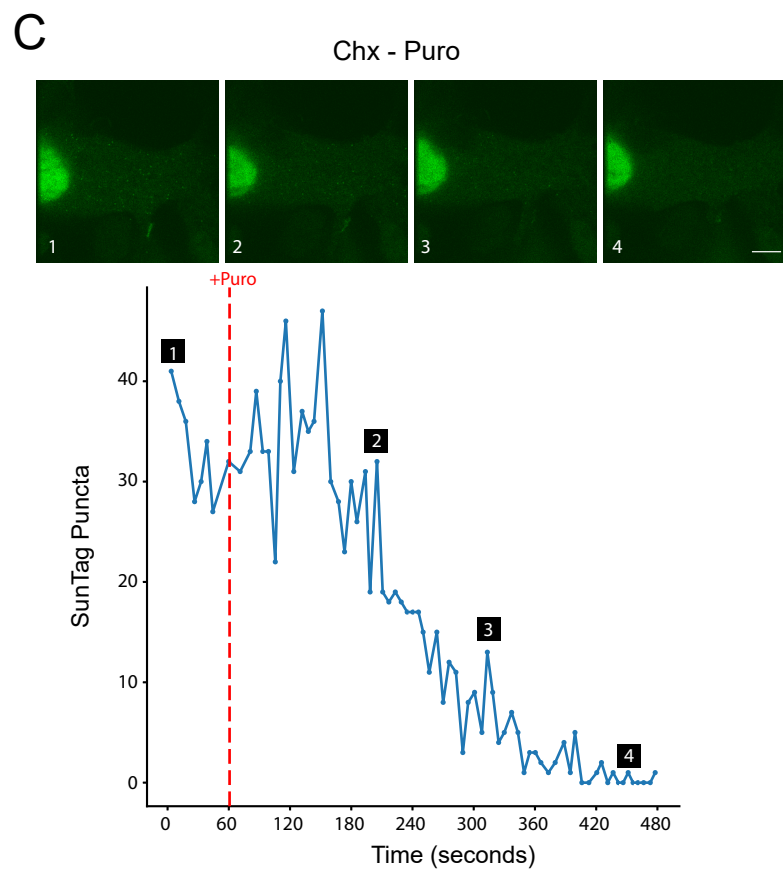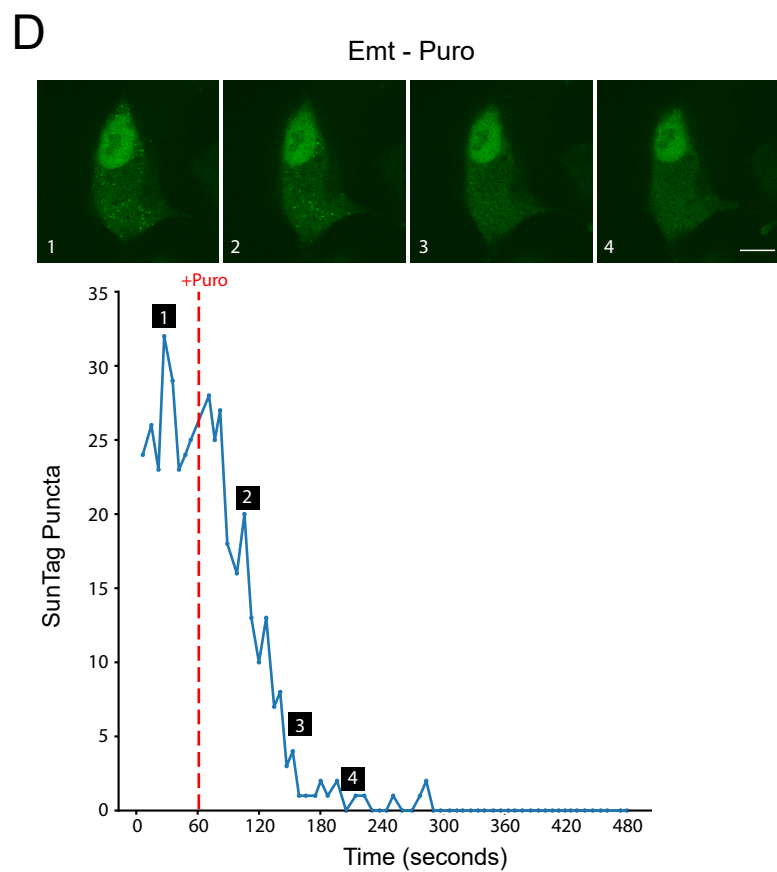

Supplement: supp [file elife-60048-supp-v1.zip › elife_poa_e60048_Figure_3_figure_supplement_2.pdf]
